# Supplementary material
Source: PubMed Central journal article supplement (PMC2528249)

**Structure Reassignment and Synthesis of Jenamidines A<sub>1</sub>/A<sub>2</sub>. Synthesis of (+)-  
NP25302, and Formal Synthesis of SB-311009 Analogues**

Jeremy R. Duvall, Fanghui Wu, and Barry B. Snider\*

Department of Chemistry, MS 015, Brandeis University, Waltham, Massachusetts 02454-  
9110.

**Supporting Material**

|                                                               |         |
|---------------------------------------------------------------|---------|
| Experimental Procedures .....                                 | S2-S14  |
| Copies of <sup>1</sup> H and <sup>13</sup> C NMR Spectra..... | S15-S71 |

**General Procedures.** All reactions were performed under nitrogen atmosphere. All commercially available reagents were used without further purification unless otherwise noted. Dichloromethane was distilled from CaH<sub>2</sub> under nitrogen. Ether and tetrahydrofuran were freshly distilled from benzophenone ketyl radical under nitrogen prior to use. Flash chromatography was performed with silica gel (40-63  $\mu\text{m}$ ). Optical rotations were measured on a precision automated polarimeter. NMR spectra were recorded on a 400 MHz spectrometer. Chemical shifts are reported in  $\delta$  and coupling constants ( $J$  values) in Hz. IR spectra were recorded on an FT-IR spectrometer and are reported in  $\text{cm}^{-1}$ . The Wittig reactions of **76** were carried out in a sealed vessel in a CEM Discover microwave oven with automatic temperature and pressure display.

**5a,6,8,9-Tetrahydro-5H-pyrido[2,1-b]quinazoline-7,11-dione (6).** A solution of 2,3-dihydro-4-pyridinone (**4**)<sup>4</sup> (100 mg, 1.09 mmol), isatoic anhydride (**5**, 178 mg, 1.09 mmol), and triethylamine (0.17 mL, 1.20 mmol) in 10 mL of dry THF was stirred in a sealed tube under N<sub>2</sub> for 8 h in an 80 °C oil bath. The mixture was cooled and concentrated to yield a mixture of recovered **4**, anthranilic acid, the desired product **6**, and the decomposition product **7**. Flash chromatography on silica gel (95:5 CH<sub>2</sub>Cl<sub>2</sub>/MeOH) yielded 150 mg of a mixture of **6** and **7** followed by 65 mg of **4** (65%). The mixture of **6** and **7** was diluted with CHCl<sub>3</sub> and filtered. The filtrate was concentrated and the resulting oil was then taken up in minimal CH<sub>2</sub>Cl<sub>2</sub>. The solution was filtered and added dropwise to a solution of hexanes. The milky suspension was filtered and the precipitate was collected to give 67 mg of 90% pure **6** (29% yield, 65% based on recovered SM). Quinazoline **6** was unstable at room temperature and decomposed to form **7** over time.

Data for **6**: mp 122-123 °C; <sup>1</sup>H NMR (CD<sub>3</sub>OD) 7.71 (d, 1,  $J$  = 8.0), 7.25 (dd, 1,  $J$  = 8.0, 7.7), 6.73 (dd, 1,  $J$  = 8.0, 7.7), 6.65 (d, 1,  $J$  = 8.0), 5.12 (dd, 1,  $J$  = 3.7, 9.2), 4.51 (ddd, 1,  $J$  = 4.3, 6.1, 13.4), 3.29 (ddd, 1,  $J$  = 4.3, 10.4, 13.4), 2.86 (dd, 1,  $J$  = 9.2, 15.3), 2.64 (dd, 1,  $J$  = 3.7, 15.3), 2.52 (ddd, 1,  $J$  = 6.1, 10.4, 15.9), 2.42 (ddd, 1,  $J$  = 4.3, 4.3,

15.9); <sup>1</sup>H NMR (CDCl<sub>3</sub>) 7.91 (d, 1, *J* = 7.9), 7.31 (dd, 1, *J* = 7.9, 7.3), 6.86 (dd, 1, *J* = 7.9, 7.3), 6.67 (d, 1, 7.9), 5.17 (ddd, 1, *J* = 1.8, 3.8, 9.2), 4.96 (br s, 1, NH), 4.73 (ddd, 1, *J* = 4.0, 6.1, 13.7), 3.24 (ddd, 1, *J* = 4.0, 10.7, 13.7), 2.92 (dd, 1, *J* = 9.2, 14.8), 2.72 (dd, 1, *J* = 3.8, 14.8), 2.62 (ddd, 1, *J* = 6.1, 10.7, 16.2), 2.49 (ddd, 1, *J* = 4.0, 4.0, 16.2); <sup>13</sup>C NMR (CD<sub>3</sub>OD) 207.8, 165.4, 148.5, 135.2, 129.1, 119.5, 115.7, 115.2, 67.6, 47.8, 40.9, 39.7; <sup>13</sup>C NMR (CDCl<sub>3</sub>) 205.7, 163.2, 145.5, 134.0, 128.5, 119.5, 114.7, 114.6, 66.5, 47.7, 40.2, 38.9; IR (KBr) 3303, 1720, 1640.

**3-(3-Oxobutyl)-4(3*H*)-quinazolone (7).** Complete conversion to **7** was easily achieved by washing a solution of 10 mg of **6** in CH<sub>2</sub>Cl<sub>2</sub> three times with 5% aqueous HCl. The organic fraction was dried over magnesium sulfate and concentrated to give 8 mg of **7**: <sup>1</sup>H NMR (CDCl<sub>3</sub>) 8.28 (d, 1, *J* = 6.7), 8.27 (s, 1), 7.76 (dd, 1, *J* = 7.9, 7.4), 7.71 (d, 1, *J* = 7.9), 7.50 (dd, 1, *J* = 7.4, 6.7), 4.22 (t, 2, *J* = 6.1), 3.07 (t, 2, *J* = 6.1), 2.16 (s, 3); <sup>13</sup>C NMR 206.2, 161.2, 148.0, 147.5, 134.2, 127.4, 127.1, 126.3, 121.9, 42.2, 41.4, 30.0; IR (neat) 1714, 1672. The <sup>1</sup>H NMR spectral data are identical to those previously reported.<sup>6</sup>

**1,3-Bis[[trifluoromethyl)sulfonyl]oxy]-6,7-dihydro-5*H*-pyrrolizine (16).** Keto amide **15**<sup>11</sup> (100 mg, 0.71 mmol) in 1 mL of dry CH<sub>2</sub>Cl<sub>2</sub> was added to NaH (63 mg, 1.56 mmol) in 1 mL of dry CH<sub>2</sub>Cl<sub>2</sub> at 0 °C under N<sub>2</sub>. The mixture was stirred for 10 min and Tf<sub>2</sub>O (0.24 mL, 1.42 mmol) was added dropwise. The mixture was stirred for 1 h at 0 °C, quenched with 2 mL of saturated NH<sub>4</sub>Cl solution, diluted with CH<sub>2</sub>Cl<sub>2</sub>, and stirred for 30 min at 25 °C. The organic layer was separated, washed with H<sub>2</sub>O and brine, dried over MgSO<sub>4</sub>, and concentrated to yield 260 mg (91%) of 90% pure bistriflate **16**. Flash chromatography on silica gel (97:2:1 hexanes/EtOAc/pyridine) gave 50 mg (17%) of pure unstable bistriflate **16**: <sup>1</sup>H NMR (CDCl<sub>3</sub>) 5.93 (s, 1), 4.02 (t, 2, *J* = 7.0), 2.95 (t, 2, *J* = 7.3), 2.56 (tt, 2, *J* = 7.0, 7.3).

***N*-Cyano-*N'*-methoxy-*N'*-methylprolinamide (18).** *N*-Methylmorpholine (5.1 mL, 46.5 mmol) in 20 mL of dry CH<sub>2</sub>Cl<sub>2</sub> and then ethyl chloroformate (8.6 mL, 90

mmol) in 20 mL of dry CH<sub>2</sub>Cl<sub>2</sub> were added to *N*-Boc-proline (10 g, 46.5 mmol) in 60 mL of dry CH<sub>2</sub>Cl<sub>2</sub> at -15 °C under N<sub>2</sub> and the mixture was stirred for 15 min.

*N*-Methylmorpholine (10.0 mL, 90.3 mmol) and *N,O*-dimethylhydroxylamine were added portionwise and the mixture was stirred for 1 h at -15 °C and at 25 °C for 15h. The mixture was diluted with H<sub>2</sub>O and extracted with EtOAc. The combined organic extracts were washed successively with 10% sodium bicarbonate solution, brine, 5% HCl solution, and brine, dried over MgSO<sub>4</sub>, and concentrated. Flash chromatography on silica gel (1:1 EtOAc/CH<sub>2</sub>Cl<sub>2</sub>) afforded 9.3 g (78%) of the *N*-Boc Weinreb amide as a 1:1 mixture of rotamers: <sup>1</sup>H NMR (CDCl<sub>3</sub>) 4.68-4.74 (m, 1 × 0.5), 4.57-4.62 (m, 1 × 0.5), 3.79 (s, 3 × 0.5), 3.72 (s, 3 × 0.5), 3.35-3.65 (m, 2), 3.20 (s, 3), 1.80-2.25 (m, 4), 1.46 (s, 9 × 0.5), 1.42 (s, 9 × 0.5).

The *N*-Boc Weinreb amide (316 mg, 1.2 mmol) was stirred in 4 mL of 1:1 TFA/CH<sub>2</sub>Cl<sub>2</sub> solution for 18 h and concentrated. A solution of the resulting oil in 4 mL of EtOH was added to a solution of sodium bicarbonate (500 mg, 6.0 mmol) and cyanogen bromide (140 mg, 1.32 mmol) in 9 mL of EtOH. The mixture was stirred for 2 h at 25 °C, treated with 2 mL of H<sub>2</sub>O, stirred for 15 min, and extracted with CH<sub>2</sub>Cl<sub>2</sub>. The combined organic extracts were dried over MgSO<sub>4</sub> and concentrated. Flash chromatography on silica gel (98:2 CH<sub>2</sub>Cl<sub>2</sub>/MeOH) gave 185 mg (84%) of cyanamide **18**: <sup>1</sup>H NMR (CDCl<sub>3</sub>) 4.57 (dd, 1, *J* = 3.7, 8.5), 3.74 (s, 3), 3.62-3.70 (m, 1), 3.45-3.55 (m, 1), 3.23 (s, 3), 2.20-2.28 (m, 1), 1.90-2.10 (m, 3).

**Addition of *tert*-Butyl Acetate to **18**.** *tert*-Butyl acetate (0.18 mL, 1.3 mmol) was added to a freshly prepared solution of LDA (1.3 mmol in 4 mL THF) at -78 °C under N<sub>2</sub> and the mixture was stirred for 15 min. Weinreb amide cyanamide **18** (215 mg, 1.17 mmol) was added in 2 mL of dry THF. The mixture was stirred for 2 h at -78 °C, quenched with 5% HCl solution, and extracted with CH<sub>2</sub>Cl<sub>2</sub>. The combined organic extracts were dried over MgSO<sub>4</sub> and concentrated. Flash chromatography on silica gel (98:2 CH<sub>2</sub>Cl<sub>2</sub>/MeOH) gave 90 mg (30%) of **24**, followed by 50 mg (21%) of **23**,

and 75 mg (32%) of **22**. A solution of urea **23** in CDCl<sub>3</sub> containing several drops of TFA completely isomerized to **22** in 2 h.

Data for *tert*-butyl 1-(2,5,6,7-tetrahydro-3-oxo-3*H*-pyrrolo[1,2-*c*]imidazole)acetate (**22**): <sup>1</sup>H NMR (CDCl<sub>3</sub>) 9.30 (br s, 1, NH), 3.66 (t, 2, *J* = 6.7), 3.27 (s, 2), 2.66 (t, 2, *J* = 7.3), 2.40 (tt, 2, *J* = 6.7, 7.3), 1.45 (s, 9); <sup>13</sup>C NMR (CDCl<sub>3</sub>) 169.0, 151.1, 124.6, 105.4, 81.5, 41.8, 32.2, 28.3, 27.9 (3 C), 22.0.

Data for *tert*-butyl (2*Z*)-(2,5,6,7-tetrahydro-3-oxo-3*H*-pyrrolo[1,2-*c*]imidazol-1-ylidene)acetate (**23**): <sup>1</sup>H NMR (CDCl<sub>3</sub>) 8.70 (br s, 1, NH), 5.19 (s, 1), 4.87 (dd, 1, *J* = 7.3, 7.3), 3.59 (ddd, 1, *J* = 8.0, 8.0, 11.0), 3.24-3.34 (m, 1), 2.58-2.66 (m, 1), 2.00-2.10 (m, 2), 1.40-1.52 (m, 1), 1.46 (s, 9); <sup>13</sup>C NMR (CDCl<sub>3</sub>) 166.5, 161.8, 155.1, 91.8, 79.5, 64.6, 44.8, 30.1, 28.3 (3 C), 26.4; HRMS (DCI/NH<sub>3</sub>) calcd for C<sub>12</sub>H<sub>19</sub>N<sub>2</sub>O<sub>3</sub> (MH<sup>+</sup>) 239.1396, found 239.1402.

Data for *tert*-butyl 2-(1-carbamoyl-pyrrolidine)-3-hydroxypropenoate (**24**): <sup>1</sup>H NMR (CDCl<sub>3</sub>) 8.95 (br s, 1, OH or NH<sub>2</sub>), 4.87 (s, 1), 4.33 (dd, 1, *J* = 7.9, 7.9), 3.59 (ddd, 1, *J* = 7.9, 7.9, 11.0), 3.15-3.22 (m, 1), 1.95-2.20 (m, 3), 1.55-1.65 (m, 1), 1.48 (s, 9).

***tert*-Butyl 3-Amino-5,6,7,7a-tetrahydro-1-oxo-1*H*-pyrrolizine-2-carboxylate (**26**)**. *tert*-Butyl acetate (1.5 mL, 11.1 mmol) was added dropwise over a period of 10 min to a freshly prepared solution of LDA (10 mmol in 27 mL THF) at -45 °C under N<sub>2</sub>. The solution was stirred for 15 min and treated with methyl (*S*)-1-cyano-2-pyrrolidinecarboxylate (**25**)<sup>19</sup> (680 mg, 4.4 mmol) in 5 mL of dry THF. The mixture was stirred for 1 h at -45 °C, treated dropwise with LHMDS (5 mL, 1.0 M in THF) and allowed to warm to 25 °C. The mixture was stirred for 2 h at 25 °C, quenched with H<sub>2</sub>O, and extracted with CH<sub>2</sub>Cl<sub>2</sub>. The combined organic extracts were dried over MgSO<sub>4</sub> and concentrated. Flash chromatography on silica gel (95:5 CH<sub>2</sub>Cl<sub>2</sub>/MeOH) gave 250 mg (24%) of byproduct **28** followed by 280 mg (27%) of pure **26**.

Data for **26**: mp 200-203 °C; [α]<sub>D</sub><sup>22</sup> -66.9 (*c* 1.2, MeOH); UV (MeOH) λ<sub>max</sub> nm (log ε) 211(4.17), 241 (4.21), 264 (4.11); <sup>1</sup>H NMR (CDCl<sub>3</sub>) 8.00 (br, 1, NH), 5.42 (br, 1,

NH), 3.87 (dd, 1,  $J = 6.7, 9.8$ ), 3.34-3.42 (m, 1), 3.20-3.28 (m, 1), 2.06-2.26 (m, 3), 1.54-1.60 (m, 1), 1.55 (s, 9);  $^{13}\text{C}$  NMR ( $\text{CDCl}_3$ ) 193.1, 174.0, 164.9, 90.5, 79.9, 69.7, 46.6, 28.5 (3 C), 27.6, 26.7; IR (KBr) 3475, 3077, 1714, 1638; HRMS (DEI) calcd for  $\text{C}_{12}\text{H}_{18}\text{N}_2\text{O}_3$  ( $\text{M}^+$ ) 238.1317, found 238.1315.

Data for **28**:  $^1\text{H}$  NMR ( $\text{CDCl}_3$ ) 9.95 (br s, 1, NH), 4.34 (s, 1), 3.98 (dd, 1,  $J = 8.6, 8.6$ ), 3.31-3.38 (m, 1), 3.21 (ddd, 1,  $J = 7.9, 7.9, 10.4$ ), 1.98-2.26 (m, 3), 1.64-1.75 (m, 1), 1.47 (s, 9);  $^{13}\text{C}$  NMR ( $\text{CDCl}_3$ ) 173.4, 169.4, 160.9, 79.1, 72.6, 63.6, 49.9, 28.4 (3 C), 27.3, 27.1. A 1D NOESY experiment showed an NOE from the alkene hydrogen ( $\delta$  4.34) to the *tert*-butyl hydrogens ( $\delta$  1.47) and the methylene group adjacent to the ring fusion nitrogen ( $\delta$  3.21 and  $\delta$  3.31-3.38) establishing that the stereochemistry is *E* as drawn.

### **3-(2-Methyl-2*E*-butenoylamino)-5,6,7,7a-tetrahydro-1*H*-pyrrolizin-1-one**

**(31)**. 2-Methyl-2*E*-butenoyl chloride (27 mg, 0.23 mmol) was treated with **26** (25 mg, 0.10 mmol) and NaH (10 mg, 0.25 mmol) and hydrolyzed and decarboxylated with 9:1  $\text{CH}_2\text{Cl}_2/\text{TFA}$  as described below for the preparation of **39d** to give 15 mg (69%) of **31** after flash chromatography on silica gel (98:2  $\text{CH}_2\text{Cl}_2/\text{MeOH}$ ):  $[\alpha]_{\text{D}}^{22}$  1.3 ( $c$  0.7, MeOH);  $^1\text{H}$  NMR ( $\text{CD}_3\text{OD}$ ) 6.60 (q, 1,  $J = 6.7$ ), 5.65 (s, 1), 3.95 (dd, 1,  $J = 8.2, 8.2$ ), 3.42-3.50 (m, 1), 3.22 (ddd, 1,  $J = 7.3, 7.3, 11.0$ ), 2.06-2.22 (m, 3), 1.88 (s, 3), 1.87 (d, 3,  $J = 6.7$ ), 1.50-1.60 (m, 1);  $^{13}\text{C}$  NMR ( $\text{CD}_3\text{OD}$ ) 204.5, 173.7, 169.9, 136.3, 133.2, (93.6, 93.5), 70.7, 28.8, (27.5, 27.4), 14.4, 12.3 (one C is obscured by the  $\text{CD}_3\text{OD}$  peak between 49-50).

**Jenamidines A<sub>1</sub>/A<sub>2</sub> 4'-Acetate (39a)**. (*S*)-4-Acetoxy-2-methylpent-2*E*-enoyl chloride (**38a**, 80 mg, 0.44 mmol) (prepared as described for **39d** using AcCl instead of methoxyacetyl chloride) was treated with **26** (36 mg, 0.15 mmol) and NaH (14 mg, 0.33 mmol) and hydrolyzed and decarboxylated with 9:1  $\text{CH}_2\text{Cl}_2/\text{TFA}$  as described below for the preparation of **39d** to give 37 mg (84%) of **39a** as a 1:1 mixture of diastereomers upon flash chromatography (95:5  $\text{CH}_2\text{Cl}_2/\text{MeOH}$ ):  $[\alpha]_{\text{D}}^{22}$  -27.5 ( $c$  0.8, MeOH);  $^1\text{H}$  NMR

(CD<sub>3</sub>OD) 6.28-6.38 (m, 1), 5.59-5.68 (m, 1), 5.62 (s, 1), 3.94 (dd, 1,  $J = 8.5, 7.9$ ), 3.39-3.46 (m, 1), 3.16-3.24 (m, 1), 2.06-2.20 (m, 3), 2.03 (s,  $3 \times 0.5$ ), 2.02 (s,  $3 \times 0.5$ ), 1.95 (s,  $3 \times 0.5$ ), 1.94 (s,  $3 \times 0.5$ ), 1.48-1.57 (m, 1), 1.35 (d,  $3 \times 0.5, J = 6.7$ ), 1.34 (d,  $3 \times 0.5, J = 6.7$ ); <sup>13</sup>C NMR (CD<sub>3</sub>OD) 204.6, 173.5, 172.0, (169.5, 169.4), (138.74, 139.69), 133.7, 93.9, 70.8, (68.9, 68.8), 28.8, 27.5, 21.0, 19.7, 13.2, one C is obscured by the CD<sub>3</sub>OD peak between 49-50; HRMS (MeOH/NBA) calcd for C<sub>15</sub>H<sub>21</sub>N<sub>2</sub>O<sub>4</sub> (MH<sup>+</sup>) 293.1501, found 293.1504.

**Triisopropylsilylation of Hydrocupreine.** Triisopropylsilyl chloride (4.28 g, 22.2 mmol) was added to a solution of hydrocupreine<sup>36</sup> (3.45 g, 11.1 mmol) and imidazole (1.51 g, 22.2 mmol) in 21 mL of DMF and the resulting solution was stirred overnight at room temperature and then poured into ethyl acetate (115 mL). The organic solution was washed with water ( $3 \times 100$  mL), dried over Na<sub>2</sub>SO<sub>4</sub>, and concentrated to give the crude TIPS silyl ether as a yellow oil. Flash chromatography on silica gel (CHCl<sub>3</sub> 200 mL, then 9:1:0.1 CHCl<sub>3</sub>/MeOH/ NH<sub>4</sub>OH) afforded 4.94 g (95%) of TIPS-DHQ:  $[\alpha]_D^{22} -8.1$  (c 1.0, CHCl<sub>3</sub>); <sup>1</sup>H NMR (CDCl<sub>3</sub>) 8.63 (d, 1,  $J = 4.3$ ), 7.64 (d, 1,  $J = 9.1$ ), 7.63 (d, 1,  $J = 4.3$ ), 7.35 (d, 1,  $J = 2.4$ ), 6.97 (dd, 1,  $J = 2.4, 9.1$ ), 6.41 (br s, 1, OH), 6.23 (br s, 1), 4.42-4.52 (m, 1), 3.37 (dd, 1,  $J = 12.0, 12.0$ ), 3.24 (dd, 1,  $J = 9.7, 13.4$ ), 2.98-3.08 (m, 1), 2.63 (br d, 1,  $J = 13.4$ ), 2.09-2.15 (m, 1), 2.01-2.06 (m, 1), 1.94 (br s, 1), 1.68-1.78 (m, 2), 1.27-1.34 (m, 3), 1.08-1.14 (m, 21), 0.77 (t, 3,  $J = 7.3$ ); <sup>13</sup>C NMR (CDCl<sub>3</sub>) 153.9, 147.4, 144.6, 143.1, 130.6, 125.2, 124.1, 118.9, 110.3, 66.6, 59.9, 56.6, 43.8, 35.4, 27.0, 24.9, 24.4, 17.91 (3 C), 17.87 (3 C), 12.6 (3 C), 11.4; IR (neat) 3226, 2936, 2861, 1619, 1502, 1456, 1237, 1259.

**DHQ-PYR-OH (60).** Potassium hydroxide (600 mg, 10.6 mmol) was added to a solution of the TIPS ether (611 mg, 1.33 mmol) and 4,6-dichloro-2,5-diphenylpyrimidine (400 mg, 1.33 mmol) in 27 mL of dry toluene. The mixture was heated in a 90 °C oil bath. The temperature of the oil bath was slowly raised to 115 °C and the mixture was stirred for 1 h at this temperature. The mixture was cooled, diluted with H<sub>2</sub>O, and

extracted with EtOAc. The combined organic fractions were dried over MgSO<sub>4</sub> and concentrated to give 990 mg of 80% pure TIPS-DHQ-PYR that was used without further purification.

HF (48-51% aqueous solution, 3 mL) was added dropwise to a solution of the above TIPS-DHQ-PYR in 33 mL of CH<sub>3</sub>CN. The mixture was stirred for 30 min, carefully quenched with a saturated sodium bicarbonate solution and extracted with EtOAc. The combined organic fractions were dried over MgSO<sub>4</sub> and concentrated. Flash chromatography on silica gel (95:5 CH<sub>2</sub>Cl<sub>2</sub>/MeOH) gave 400 mg (52% from the TIPS ether) of **60**:  $[\alpha]_D^{22} +259.4$  (c 1.0, CHCl<sub>3</sub>); <sup>1</sup>H NMR (CDCl<sub>3</sub>) 8.68 (br s, 1), 8.61 (d, 1, *J* = 4.6), 7.97 (d, 1, *J* = 9.1), 7.87 (br d, 2, *J* = 7.3), 7.60 (dd, 2, *J* = 7.3, 7.3) 7.48-7.56 (m, 3), 7.27 (dd, 1, *J* = 2.1, 9.1), 7.24-7.27 (m, 1), 7.18 (d, 1, *J* = 4.6), 6.95-7.01 (m, 3), 3.05-3.16 (m, 3), 2.67-2.74 (m, 1), 2.31 (d, 1, *J* = 12.8), 1.76-1.81 (m, 1), 1.63 (br s, 1), 1.43-1.52 (m, 2), 1.08-1.21 (m, 3), 0.83 (br s, 1), 0.71 (t, 3, *J* = 7.0) (the OH was not observed); <sup>13</sup>C NMR (CDCl<sub>3</sub>) 165.9, 162.7, 159.7, 157.0, 146.3, 143.8, 143.6, 135.1, 132.2, 131.2, 130.9, 129.9 (2 C), 128.63 (2 C), 128.60, 128.3 (2 C), 128.1 (2 C), 127.2, 123.0, 118.5, 117.1, 107.5, 76.2, 58.4, 58.2, 43.4, 36.7, 27.2, 26.5, 24.8, 20.3, 11.8; IR (neat) 3580, 3055, 2955, 2868, 1619, 1571, 1517, 1408, 1376, 1241, 999, 851, 756, 700; HRMS (CI) Calcd for C<sub>35</sub>H<sub>34</sub>CIN<sub>4</sub>O<sub>2</sub> (MH<sup>+</sup>) 577.2370, found 577.2357.

**Ethyl 2-Methyl-2-nitro-5-oxohexanoate (52)**. DABCO (48 mg, 0.41 mmol) was added to a solution of ethyl 2-nitropropionate (**51**, 600 mg, 4.08 mmol) in 6 mL of dry CH<sub>2</sub>Cl<sub>2</sub> and the mixture was stirred for 10 min. Methyl vinyl ketone (**50**, 0.85 mL, 10.2 mmol) was then added dropwise and the resulting solution was stirred for 5 h at 25 °C, passed through a short pad of silica gel with Et<sub>2</sub>O to remove the catalyst and concentrated to give 866 mg (98%) of pure (±)-**52**, whose data matched those previously reported.<sup>31,34</sup>

A solution of catalyst **60** (240 mg, 0.40 mmol) and ethyl 2-nitropropionate (600 mg, 4.08 mmol) in 8 mL of dry CH<sub>2</sub>Cl<sub>2</sub> was kept at -20 °C for 2 h and methyl vinyl ketone (0.85 mL, 10.2 mmol) was then added dropwise. The resulting solution was kept



at -20 °C for 3 d, passed through a short pad of silica gel with Et<sub>2</sub>O to remove the catalyst and concentrated to give 890 mg (100%) of pure (+)-**52**:  $[\alpha]_D^{22} +3.3$  (*c* 1.0, MeOH).

Removal of catalyst **60** was critical for the success of the one-pot reduction using H<sub>2</sub> and Pd at neutral and then acidic pH.

**Ethyl  $\alpha$ ,2-Dimethyl- $\alpha$ -nitro-1,3-dioxolane-2-butanoate.** A solution of (+)-**52** (20 mg, 0.09 mmol), ethylene glycol (0.1 ml) and TsOH (5 mg) in 2 mL of benzene was stirred at reflux for 4 h as described by Feringa.<sup>34</sup> The mixture was cooled, diluted with saturated sodium bicarbonate solution and extracted with EtOAc. The combined organic extracts were dried over MgSO<sub>4</sub> and concentrated to give 22 mg (94%) of pure dioxolane:  $[\alpha]_D^{22} -4.7$  (*c* 1.0, MeOH); <sup>1</sup>H NMR (CDCl<sub>3</sub>) 4.27 (q, 2, *J* = 7.3), 3.90-4.00 (m, 4), 2.36 (ddd, 1, *J* = 13.1, 13.1, 4.2), 2.25 (ddd, 1, *J* = 13.1, 13.1, 4.2), 1.77 (s, 3), 1.69 (ddd, 1, *J* = 13.1, 13.1, 4.2), 1.60 (ddd, 1, *J* = 13.1, 13.1, 4.2), 1.33 (s, 3), 1.29 (t, 3, *J* = 7.3); <sup>13</sup>C NMR (CDCl<sub>3</sub>) 167.3, 108.9, 92.3, 64.7 (2 C), 62.8, 33.0, 30.9, 23.9, 21.4, 13.8.

The enantiomer excess was determined to be 90% (95:5) by HPLC analysis [Daicel chiralcel OJ, hexanes/IPA, 90:10, 1.00 ml/min,  $\lambda$  220 nm, *t* (major) = 11.3 min, *t* (minor) = 12.6 min].<sup>34</sup> A similar analysis performed with Michael adduct (-)-**52**, formed using catalyst **59**,<sup>35</sup> showed a 90:10 mixture of enantiomers (80% ee): *t* (major) = 12.6 min, *t* (minor) = 11.3 min].

**Reduction of **52** over Pd at 1 atm of H<sub>2</sub>.** A solution of **52** (866 mg, 3.99 mmol) in 20 mL of EtOH containing 10% Pd on activated carbon (430 mg, 0.41 mmol) and Na<sub>2</sub>SO<sub>4</sub> (600 mg, 4.22 mmol) was stirred under 1 atm of H<sub>2</sub> at 25 °C for 12 h. The mixture was filtered through Celite and concentrated to give 735 mg (99%) of ethyl 2,5-dimethyl-1-pyrroline-5-carboxylate 1-oxide (**55**): <sup>1</sup>H NMR (CDCl<sub>3</sub>) 4.15-4.31 (m, 2), 2.75-2.86 (m, 1), 2.64-2.73 (m, 1), 2.41-2.49 (m, 1), 2.10 (s, 3), 1.98-2.08 (m, 1), 1.71 (s, 3), 1.29 (t, 3, *J* = 7.0); <sup>13</sup>C NMR (CDCl<sub>3</sub>) 170.4, 145.2, 78.6, 62.0, 30.4, 30.3, 20.9, 13.9, 13.0.

**Ethyl 2,5-Dimethyl-1-hydroxy-2-pyrrolidinecarboxylate (53).** Nitrone **55** (735 mg, 3.97 mmol) was stirred with PtO<sub>2</sub> (92 mg, 0.40 mmol) in 20 mL of EtOH under 1 atm of H<sub>2</sub> at 25 °C for 8 h. The mixture was filtered through Celite and concentrated to give 750 mg (100%) of hydroxylamine **53** containing 5% of the diastereomer **54** that was used without purification. An analytical sample of **53** was prepared by flash chromatography on silica gel (75:25 hexanes/EtOAc): <sup>1</sup>H NMR (CDCl<sub>3</sub>) 5.08 (br s, 1, OH), 4.15-4.23 (m, 2), 3.04-3.12 (m, 1), 2.08-2.16 (m, 1), 1.85-1.95 (m, 1), 1.72-1.80 (m, 1), 1.30-1.40 (m, 1) 1.35 (s, 3), 1.28 (t, 3, *J* = 7.0), 1.22 (d, 3, *J* = 6.1); <sup>13</sup>C NMR (CDCl<sub>3</sub>) 175.5, 69.6, 60.8, 58.2, 31.2, 26.0, 19.0, 16.6, 14.2; IR (neat) 3446, 1731; HRMS (NH<sub>3</sub>/CI) Calcd for C<sub>9</sub>H<sub>18</sub>NO<sub>3</sub> (MH<sup>+</sup>) 188.1287, found 188.1283.

**Ethyl *trans*-2,5-Dimethyl-2-pyrrolidinecarboxylate (49).** Zn dust (1.28 g, 19.5 mmol) and Cu(OAc)<sub>2</sub> (71 mg, 0.39 mmol) were stirred for 15 min at 25 °C in 4 mL of HOAc and then treated with a solution of hydroxylamine **53** (730 mg, 3.9 mmol) in 2 mL of EtOH and 4 mL of HOAc. The mixture was stirred for 2.5 h at 70 °C and then cooled to rt. EDTA (4 g) was added and the solution was adjusted to pH 10 with 2 M NaOH and extracted with EtOAc. The combined organic extracts were dried over MgSO<sub>4</sub> and concentrated to give 422 mg (63%) of pure **49**: <sup>1</sup>H NMR (CDCl<sub>3</sub>) 4.18 (q, 2, *J* = 7.0), 3.27 (ddd, 1, *J* = 6.1, 6.1, 9.2), 2.32 (br s, 1, NH), 2.22-2.31 (m, 1), 1.88-1.96 (m, 1), 1.66-1.75 (m, 1), 1.38 (s, 3), 1.28 (t, 3, *J* = 7.0), 1.18-1.28 (m, 1), 1.19 (d, 3, *J* = 6.1); <sup>13</sup>C NMR (CDCl<sub>3</sub>) 177.6, 65.8, 61.1, 54.5, 38.5, 34.6, 26.6, 20.9, 14.1; IR (neat) 3345, 1727; HRMS (EI) Calcd for C<sub>9</sub>H<sub>16</sub>NO<sub>2</sub> (M-H<sup>+</sup>) 170.1181, found 170.1181.

**(*S*)-Mosher Amide of (-)-49 (63).** The Mosher acid chloride was prepared analogously (see preparation of **64**) from (*S*)- $\alpha$ -methoxy- $\alpha$ -(trifluoromethyl)phenylacetic acid (32 mg, 0.14 mmol), DMF (10  $\mu$ L, 0.14 mmol) and oxalyl chloride (60  $\mu$ L, 0.66 mmol). The acid chloride was stirred with (-)-**49**•HCl (20 mg, 0.12 mmol, prepared with catalyst **60**) and diisopropylethylamine (42  $\mu$ L, 0.24 mmol) in 1 mL of dry CH<sub>2</sub>Cl<sub>2</sub> for 1 h at 25 °C. The mixture was concentrated, taken up in a saturated ammonium chloride

solution, and extracted with CH<sub>2</sub>Cl<sub>2</sub>. The combined organic extracts were dried over MgSO<sub>4</sub> and concentrated. Flash chromatography on silica gel (80:20 hexanes/EtOAc) gave 35 mg (76%) of Mosher amide **63**: [ $\alpha$ ]<sup>22</sup><sub>D</sub> -98 (*c* 1.0, MeOH); <sup>1</sup>H NMR (CDCl<sub>3</sub>) 7.50-7.54 (m, 2), 7.37-7.41 (m, 3), 4.16-4.27 (m, 2), 3.73 (s, 3), 3.25-3.31 (m, 1), 2.16 (ddd, 1, *J* = 12.8, 12.8, 6.1), 1.70-1.76 (m, 1), 1.67 (s, 3), 1.56-1.64 (m, 1), 1.26-1.35 (m, 1), 1.28 (t, 3, *J* = 7.0), 1.24 (d, 3, *J* = 6.7); <sup>13</sup>C NMR (CDCl<sub>3</sub>) 173.6, 165.0, 134.5, 129.2, 128.1 (2 C), 126.5 (2 C), 123.7 (q, *J* = 291), 84.4 (q, *J* = 23), 68.4, 61.3, 56.2, 55.1, 34.9, 32.1, 20.3, 19.8, 14.1; IR (neat) 1749, 1643; HRMS (ES) Calcd for C<sub>19</sub>H<sub>25</sub>NO<sub>4</sub>F<sub>3</sub> (MH<sup>+</sup>) 388.1736, found 388.1731.

**(R)-Mosher Amide of (-)-49 (64).** Oxalyl chloride (60  $\mu$ L, 0.66 mmol) was added to a solution of (*R*)- $\alpha$ -methoxy- $\alpha$ -(trifluoromethyl)phenylacetic acid (32 mg, 0.14 mmol) and DMF (10  $\mu$ L, 0.14 mmol) in 1 mL of hexane and the mixture was stirred for 1 h at 25 °C, filtered, and concentrated. The resulting acid chloride was stirred with (-)-**49**•HCl (20 mg, 0.12 mmol, prepared with catalyst **60**) and diisopropylethylamine (42  $\mu$ L, 0.24 mmol) in 1 mL of dry CH<sub>2</sub>Cl<sub>2</sub> for 1 h at 25 °C. The mixture was concentrated, taken up in a saturated ammonium chloride solution, and extracted with CH<sub>2</sub>Cl<sub>2</sub>. The combined organic extracts were dried over MgSO<sub>4</sub> and concentrated. Flash chromatography on silica gel (80:20 hexanes/EtOAc) gave 34 mg (74%) of Mosher amide **64**: [ $\alpha$ ]<sup>22</sup><sub>D</sub> +70 (*c* 1.0, MeOH); <sup>1</sup>H NMR (CDCl<sub>3</sub>) 7.59-7.62 (m, 2), 7.36-7.40 (m, 3), 4.53-4.60 (m, 1), 4.17-4.27 (m, 2), 3.67 (s, 3), 2.04-2.20 (m, 2), 1.78-1.82 (m, 1), 1.63 (s, 3), 1.57-1.63 (m, 1), 1.31 (t, 3, *J* = 7.0), 0.21 (d, 3, *J* = 6.1); <sup>13</sup>C NMR (CDCl<sub>3</sub>) 173.5, 163.8, 133.5, 129.4, 128.1 (2 C), 127.2 (2 C), 123.7 (q, *J* = 290), 84.5 (q, *J* = 24), 68.1, 61.2, 54.8, 54.7, 34.5, 32.8, 20.7, 19.0, 14.1; IR (neat) 1731, 1641; HRMS (ES) Calcd for C<sub>19</sub>H<sub>25</sub>NO<sub>4</sub>F<sub>3</sub> (MH<sup>+</sup>) 388.1736, found 388.1732.

**Oxidation of 26 with Two Equivalents of Lead Tetraacetate at Reflux to Give *tert*-Butyl (4 $\beta$ ,7 $\alpha\beta$ )-4,7 $\alpha$ -Diacetoxy-3-amino-5,6,7,7 $\alpha$ -tetrahydro-1-oxo-1H-pyrrolizine-2-carboxylate (65).** Lead tetraacetate (257 mg, 0.58 mmol) was added to a

solution of **26** (70 mg, 0.29 mmol) in 9 mL of dry benzene. The mixture was stirred under N<sub>2</sub> at reflux for 20 h, filtered, and washed with saturated sodium bicarbonate solution. The organic layer was dried over MgSO<sub>4</sub> and concentrated to give 45 mg of crude diacetate **65**. Flash chromatography on silica gel (97:3 CH<sub>2</sub>Cl<sub>2</sub>/MeOH) gave 40 mg (39%) of pure **65**: UV (MeOH)  $\lambda_{\max}$  nm (log  $\epsilon$ ) 207 (3.98), 239 (4.16), 268 (4.08); <sup>1</sup>H NMR (CDCl<sub>3</sub>) 8.28 (br s, 1, NH), 7.95 (br s, 1, NH), 6.04 (dd, 1, *J* = 6.1, 6.7, H-4), 2.55-2.65 (m, 2, H-5), 2.34 (dd, 1, *J* = 6.1, 13.5, H-6 $\alpha$ ), 2.14 (s, 3), 2.08 (s, 3), 1.74 (ddd, 1, *J* = 12.8, 12.8, 9.2, H-6 $\beta$ ), 1.54 (s, 9); <sup>13</sup>C NMR (CDCl<sub>3</sub>) 185.0, 173.2, 171.3, 168.2, 165.2, 97.6, 88.2, 84.2, 80.4, 32.2, 31.9, 28.4 (3 C), 21.3, 21.0; IR (neat) 1759, 1730, 1656, 1625; HRMS (ES) Calcd for C<sub>16</sub>H<sub>23</sub>N<sub>2</sub>O<sub>7</sub> (MH<sup>+</sup>) 355.1505, found 355.1517.

An NOE was observed between H<sub>4</sub> at  $\delta$  6.04 and one or both H<sub>5</sub>'s at  $\delta$  2.55-2.65, H<sub>6</sub> at  $\delta$  1.74 and the acetate at  $\delta$  2.14.

**Oxidation of (7a*S*)-*tert*-Butyl 3-Amino-5,6,7,7a-tetrahydro-1-oxo-1*H*-pyrrolizine-2-carboxylate (**26**) with One Equivalent of Lead Tetraacetate at 25 °C.**

Lead tetraacetate (110 mg, 0.25 mmol) was added to a solution of **26** (50 mg, 0.20 mmol) in 6 mL of dry benzene. The mixture was stirred under N<sub>2</sub> at 25 °C for 20 h, filtered, and washed with saturated sodium bicarbonate solution. The organic layer was dried over MgSO<sub>4</sub> and concentrated to give 30 mg of a mixture of **26**, **66**, and **67**. Flash chromatography on silica gel (39:1 CH<sub>2</sub>Cl<sub>2</sub>/MeOH) gave 12 mg of 90% pure **66**, followed by 4 mg of pure **66**, 1 mg of a 2:1 mixture of **66** and **68**, 3 mg of pure **68** and 6 mg of recovered **26**.

Data for *tert*-butyl 3-amino-5,6,7,7a-tetrahydro-7a-methoxy-1-oxo-1*H*-pyrrolizine-2-carboxylate (**68**): UV (MeOH)  $\lambda_{\max}$  nm (log  $\epsilon$ ) 211 (3.73), 239 (3.83), 270 (3.60); <sup>1</sup>H NMR (CDCl<sub>3</sub>) 8.35 (br s, 1, NH), 5.48 (br s, 1, NH), 3.42-3.50 (m, 1), 3.27-3.35 (m, 1), 3.21 (s, 3), 2.30-2.42 (m, 1), 2.06-2.16 (m, 2), 1.60-1.70 (m, 1), 1.55 (s, 9); <sup>13</sup>C NMR (CDCl<sub>3</sub>) 80.5, 51.4, 46.2, 32.2, 28.5 (3 C), 26.1, five quaternary carbons were

not observed; IR (neat) 1712, 1650, 1616; HRMS (ES) Calcd for C<sub>13</sub>H<sub>21</sub>N<sub>2</sub>O<sub>4</sub> (MH<sup>+</sup>) 269.1501, found 269.1508.

Data for *tert*-butyl (4 $\beta$ ,7 $\alpha$  $\beta$ )-4-acetoxy-3-amino-5,6,7,7 $\alpha$ -tetrahydro-1-oxo-1*H*-pyrrolizine-2-carboxylate (**66**): UV (MeOH)  $\lambda_{\text{max}}$  nm (log  $\epsilon$ ) 204 (3.51), 239 (3.63), 260 (3.57); <sup>1</sup>H NMR (CDCl<sub>3</sub>) 8.05 (br s, 1, NH), 7.72 (br s, 1, NH), 5.95 (dd, 1, *J* = 5.5, 5.5, H-4), 4.05 (dd, 1, *J* = 8.0, 9.1, H-7 $\alpha$ ), 2.50-2.58 (m, 1, H-5), 2.25-2.40 (m, 2, H-5, H-6), 2.16 (s, 3), 1.65-1.75 (m, 1, H-6), 1.55 (s, 9); <sup>13</sup>C NMR (CDCl<sub>3</sub>) 83.6, 68.4, 33.6, 28.5 (3 C), 26.0, 21.4, six quaternary carbons were not observed; IR (neat) 1726, 1652, 1620; HRMS (ES) Calcd for C<sub>14</sub>H<sub>21</sub>N<sub>2</sub>O<sub>5</sub> (MH<sup>+</sup>) 297.1450, found 297.1454.

An NOE was observed between H<sub>4</sub> at  $\delta$  5.95 and H<sub>5</sub> at  $\delta$  2.55. Another NOE was observed between H<sub>7 $\alpha$</sub>  at  $\delta$  4.05 and H<sub>6</sub> and/or H<sub>5</sub> at  $\delta$  2.3, and lastly, an NOE was observed between H<sub>6</sub> at  $\delta$  1.7 and H<sub>6</sub> and/or H<sub>5</sub> at 2.3 and H<sub>5</sub> at 2.55.

**Oxidation of 26 with One Equivalent of Lead Tetraacetate at Reflux.** Lead tetraacetate (180 mg, 0.40 mmol) was added to a solution of **26** (100 mg, 0.40 mmol) in 12 mL of dry benzene. The mixture was stirred under N<sub>2</sub> at reflux for 1.5 h, filtered, and washed with saturated sodium bicarbonate solution. The organic layer was dried over MgSO<sub>4</sub> and concentrated to give 50 mg of a 3:3:2 mixture of **26**, **67**, and **66**, and a trace of diacetate **65**.

**(S)-Proline-*N*-carboxyanhydride (76)** was prepared as previously described.<sup>49</sup> Triphosgene (62 mg, 0.21) in 2 mL of dry THF was added over a 5-10 min period to a solution of proline (**75**, 60 mg, 0.52 mmol) in 2 mL of dry THF at 15 °C. The mixture was submerged in a 40-45 °C oil bath and stirred until the solution was homogenous (60-90 min). The solution was then concentrated to an oil with careful exclusion of air to eliminate any excess HCl present. The oil was dissolved in 2 mL of dry THF and cooled to 0 °C. Triethylamine (72  $\mu$ L, 0.52 mmol) was added dropwise over a period of 10 min and the mixture was stirred for 30 min. The mixture was filtered with careful exclusion of air to give proline-NCA in a solution of THF that was used immediately.

**Methyl (2*E*)-[(7*aS*)-Tetrahydro-3-oxo-1*H*,3*H*-pyrrolo[1,2-*c*]oxazol-1-ylidene]-acetate (78).** A solution of **76** in 2 mL of THF (prepared from 0.52 mmol of proline) was added to methyl (triphenylphosphoranylidene)acetate (**77**, 87 mg, 0.26 mmol) in 1 mL of dry toluene under N<sub>2</sub> in a microwave tube. The mixture was heated at 150 °C at 75 psi for 15 min in a microwave. After cooling, the mixture was concentrated to give crude **78** as a 9:1 mixture of the *E* and *Z* products. Flash chromatography on silica gel (98:2 CH<sub>2</sub>Cl<sub>2</sub>/MeOH) gave 18 mg (35%) of pure **78**:  $[\alpha]_D^{22}$  -207 (*c* 1.0, MeOH); UV (MeOH)  $\lambda_{\max}$  nm (log  $\epsilon$ ) 212 (4.01), 238 (4.13); <sup>1</sup>H NMR (CDCl<sub>3</sub>) 5.66 (d, 1, *J* = 1.8), 4.92 (ddd, 1, *J* = 7.3, 7.3, 1.8), 3.73 (s, 3), 3.69 (ddd, 1, *J* = 8.0, 8.0, 11.6), 3.27-3.34 (m, 1), 2.58-2.67 (m, 1), 2.02-2.18 (m, 2), 1.55-1.68 (m, 1); <sup>13</sup>C NMR 166.6, 165.6, 156.6, 95.3, 64.2, 51.4, 45.9, 30.2, 26.2; IR (neat) 1804, 1716, 1667; HRMS (ES) Calcd for C<sub>9</sub>H<sub>12</sub>NO<sub>4</sub> (MH<sup>+</sup>) 198.0766, found 198.0767.

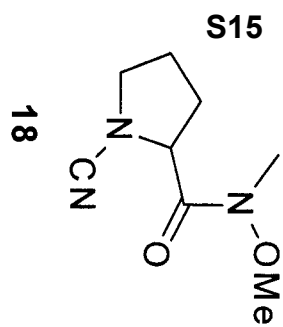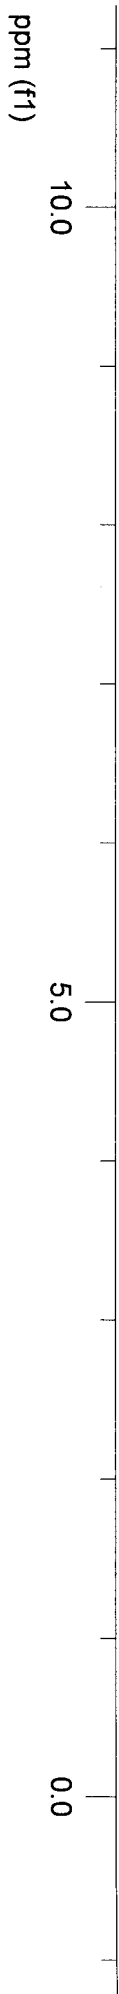

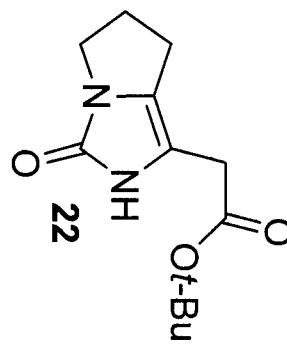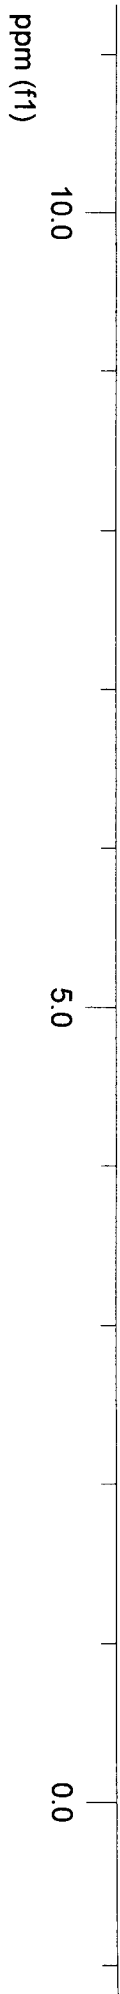



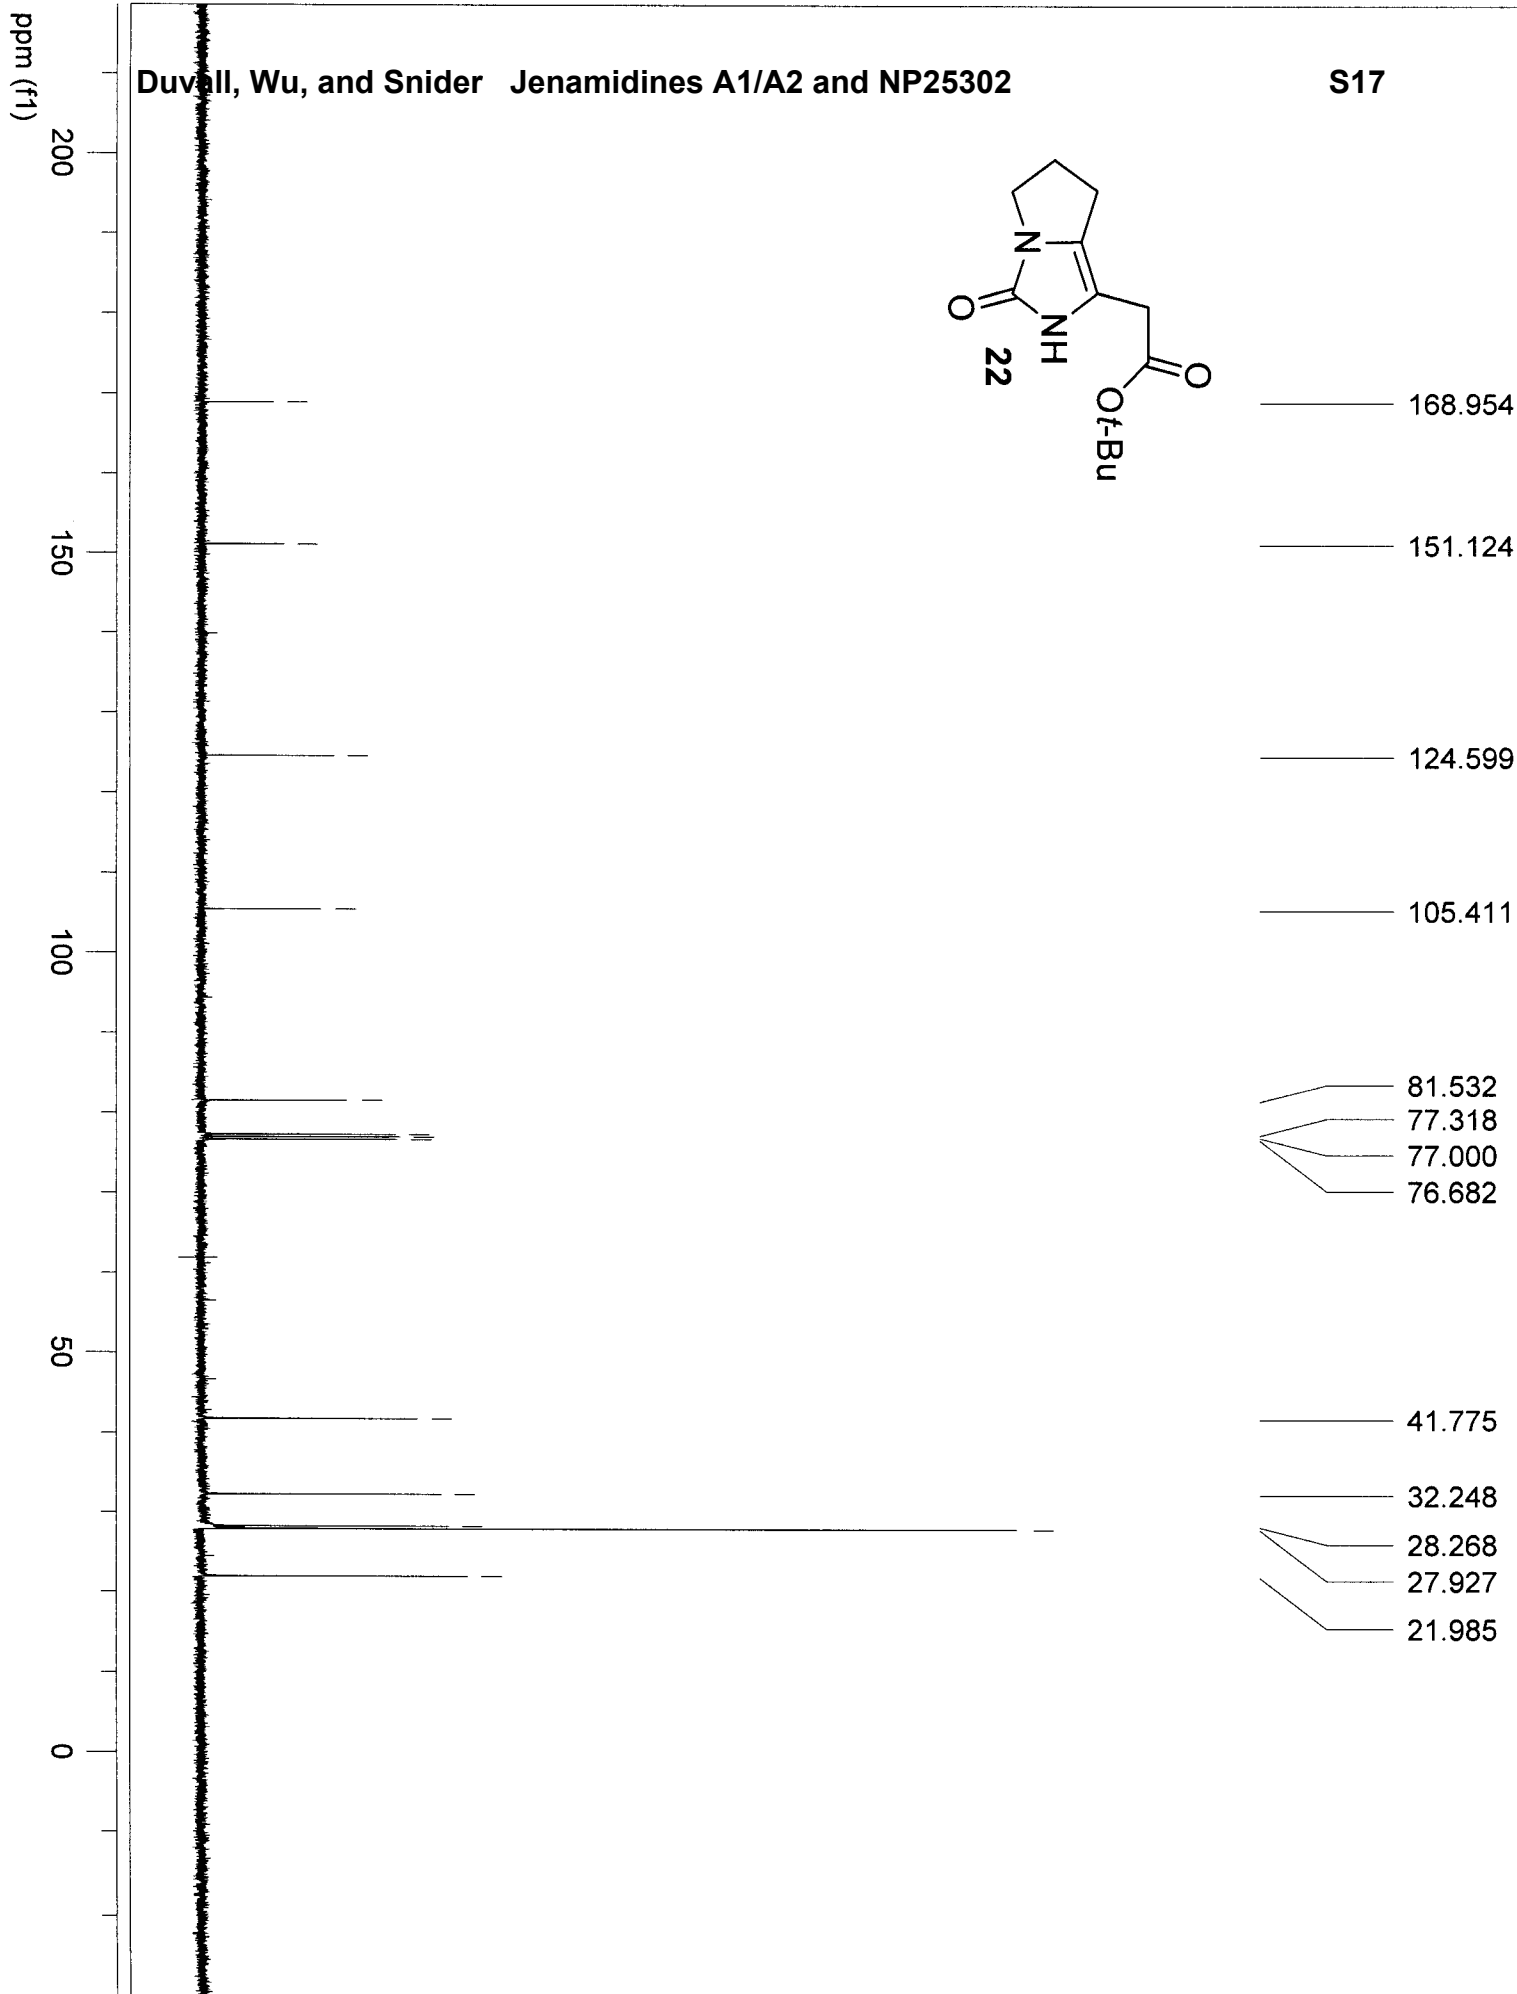

ppm (f1)

10.0

5.0

0.0

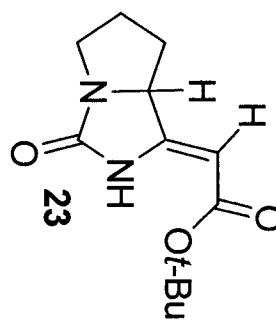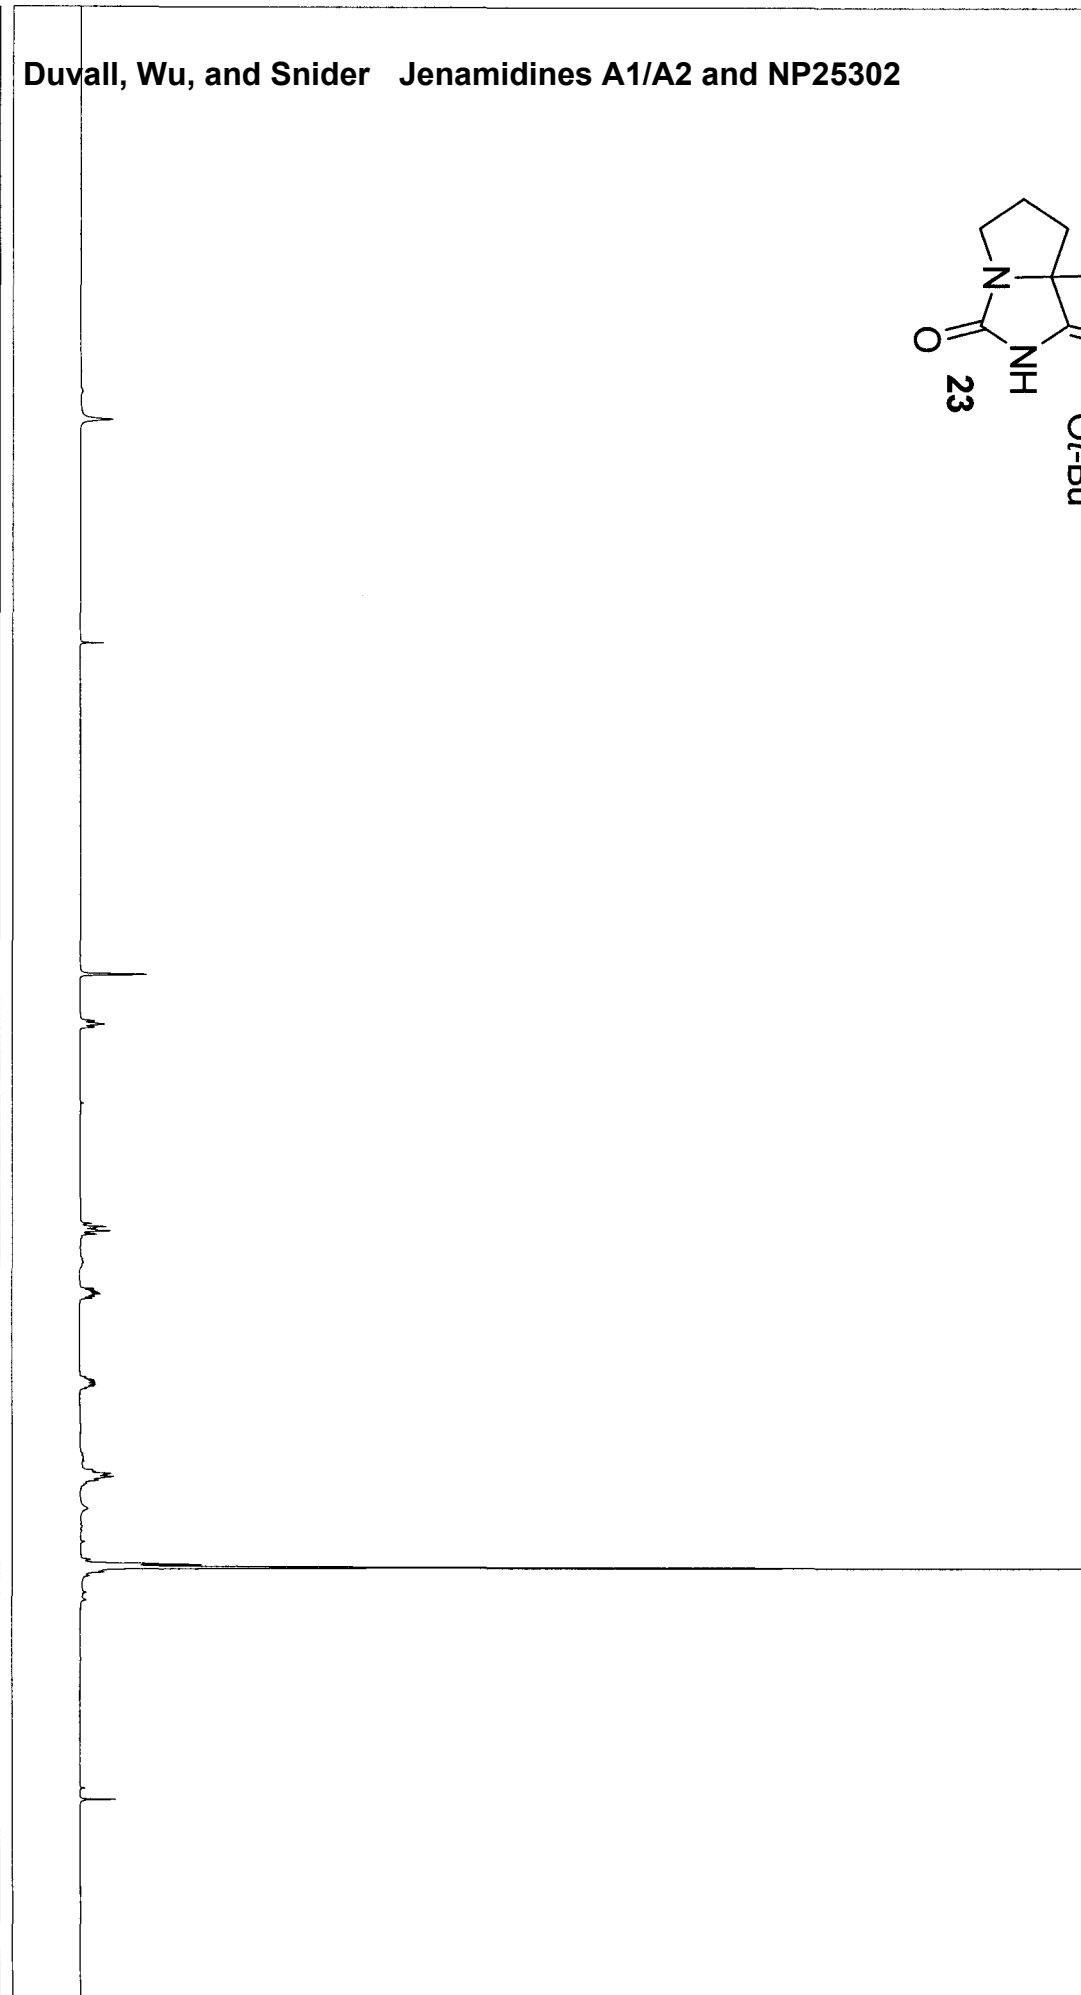

ppm (t1)

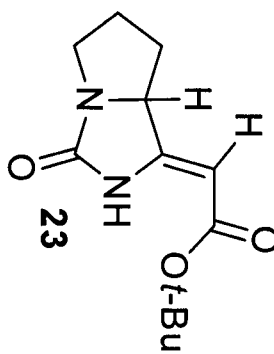

166.499  
161.811  
155.075

150

100

91.780

79.454

77.318

77.000

76.682

64.616

50

44.774

0

30.074

28.317

26.445

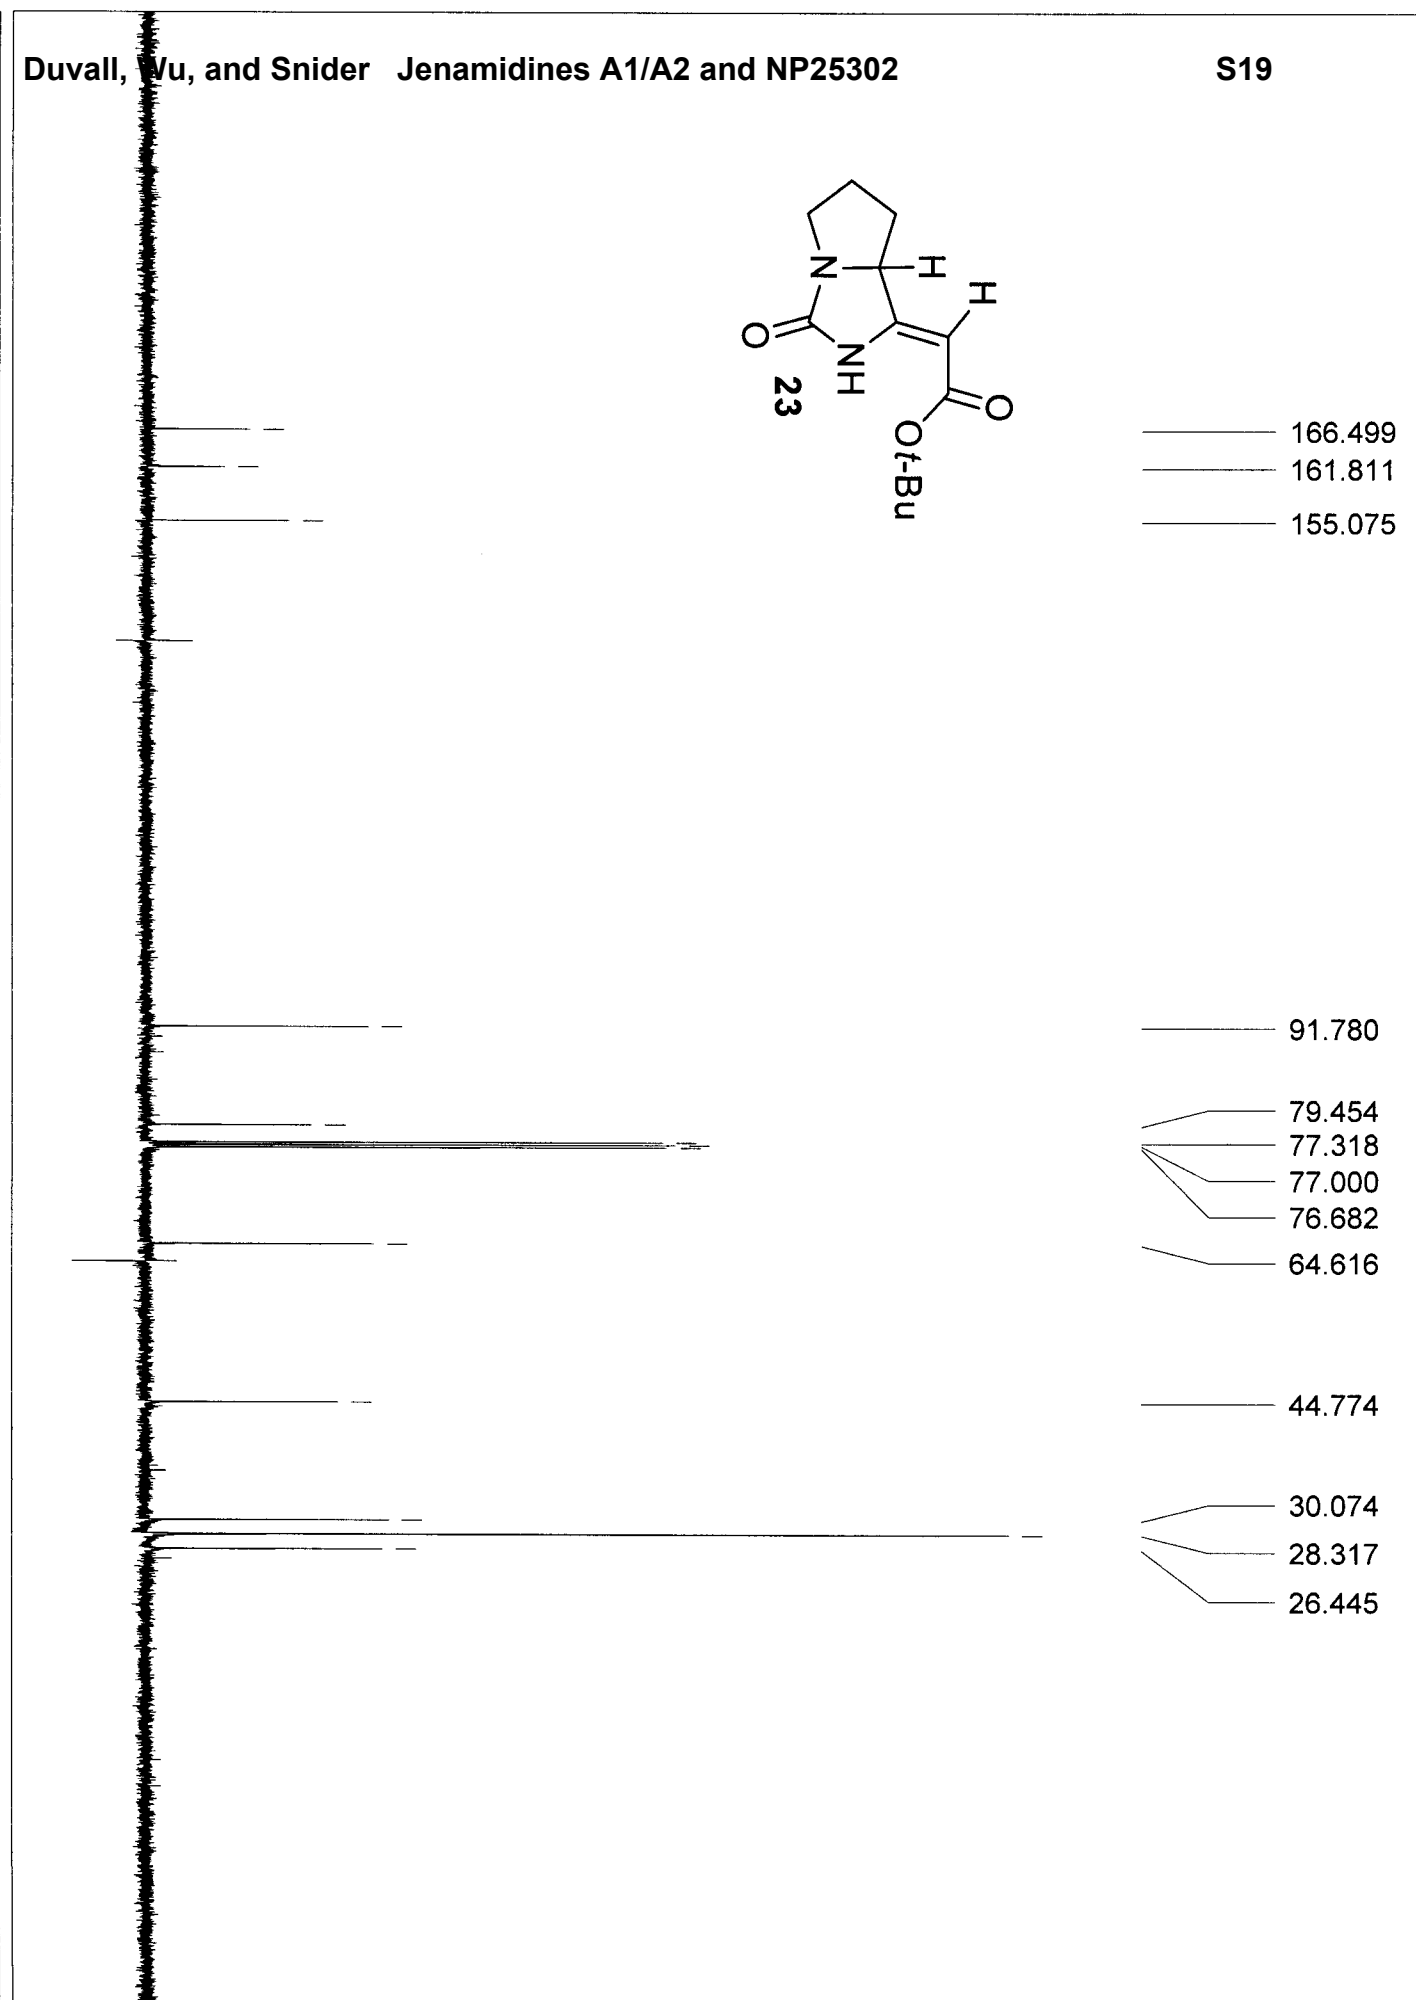

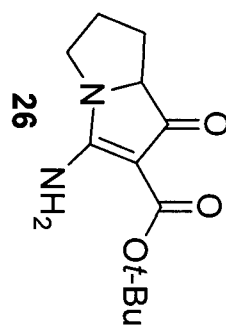

ppm (t1)

10.0

5.0

0.0

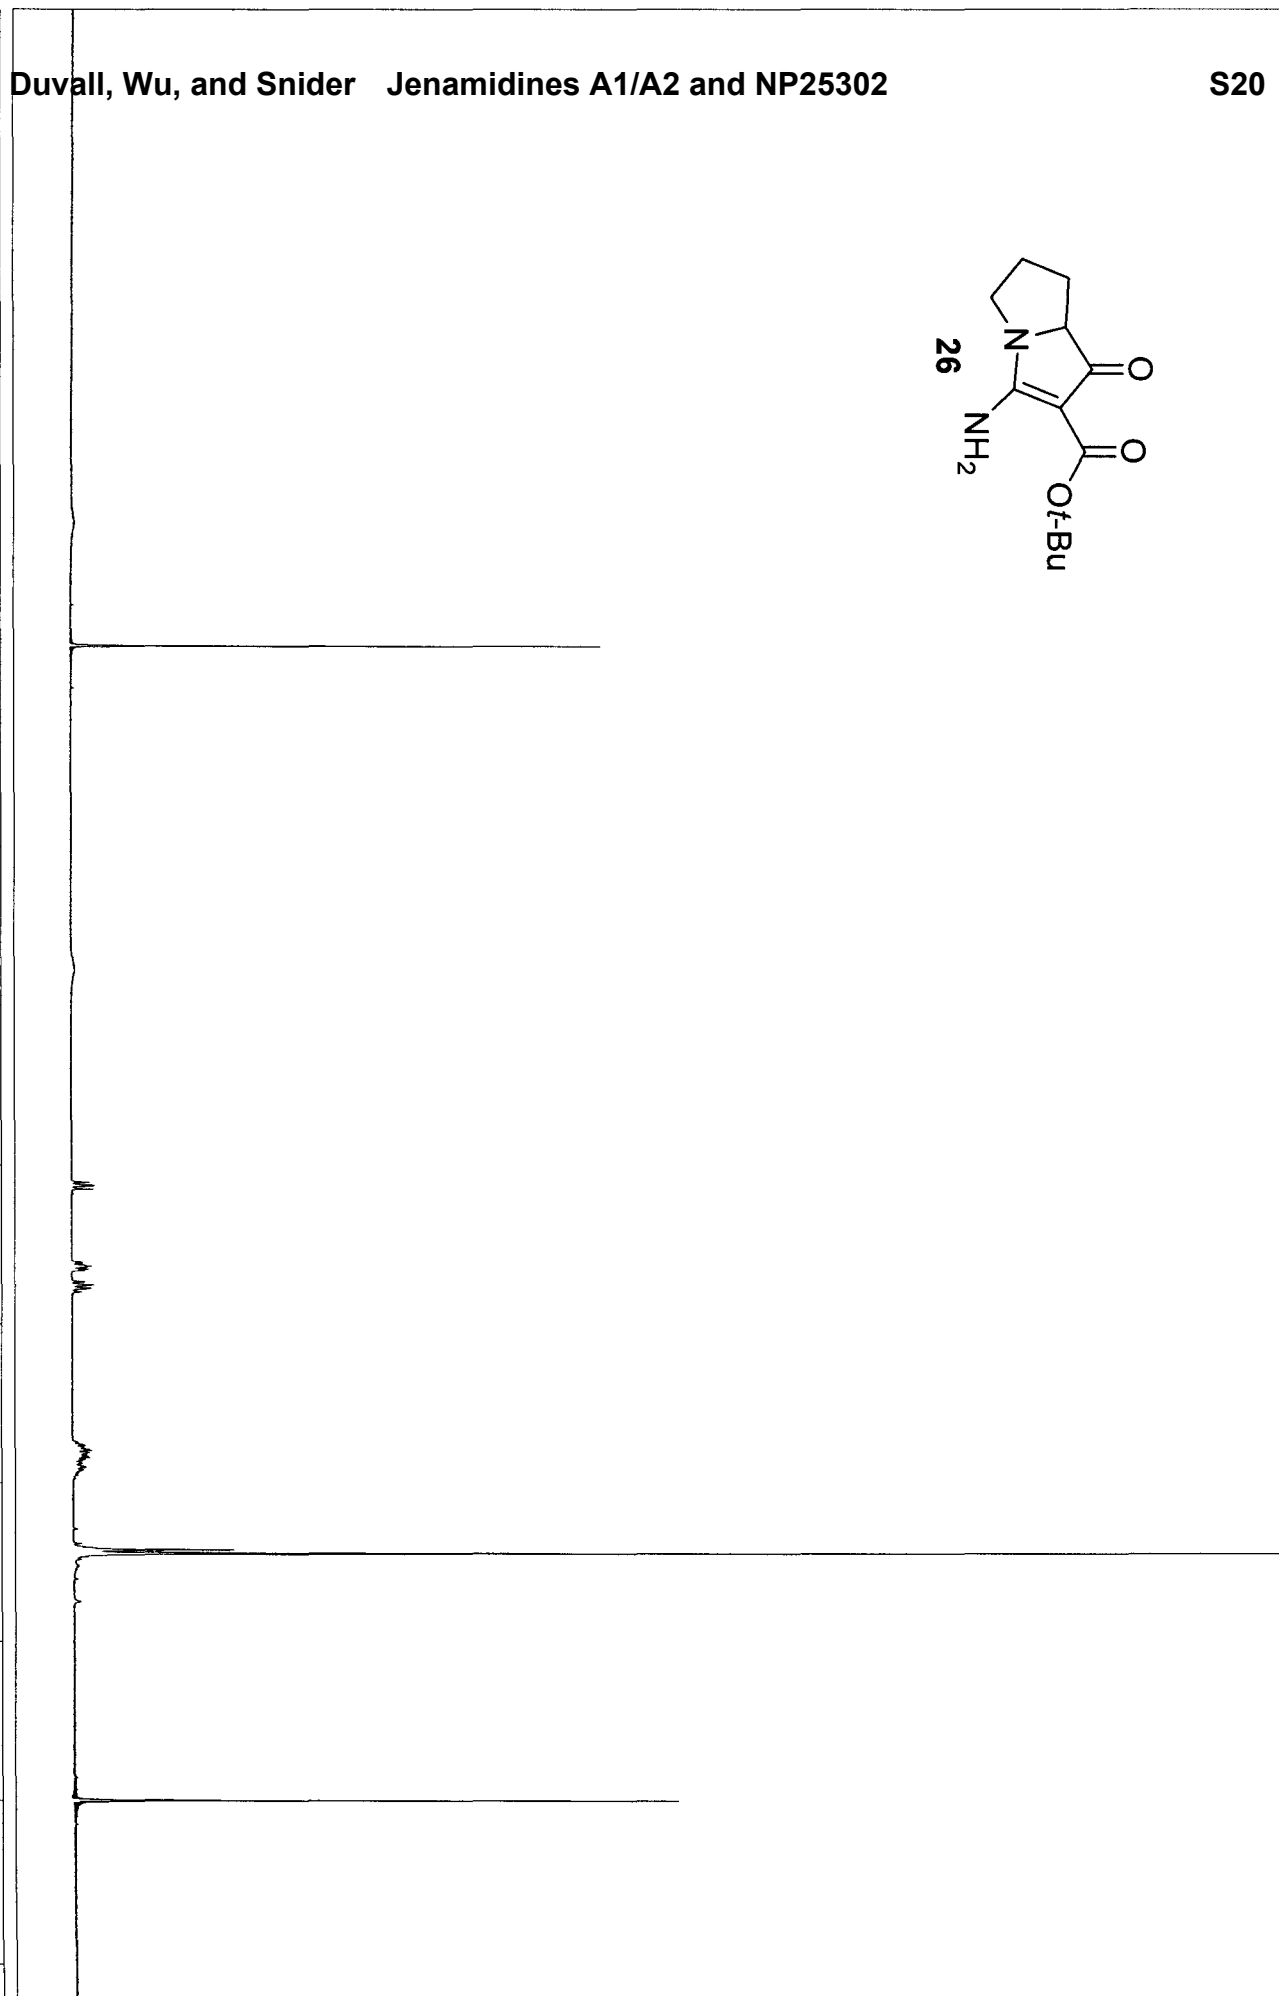

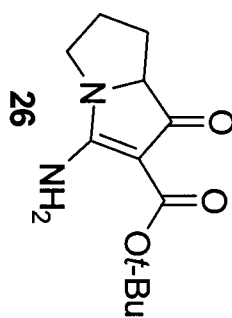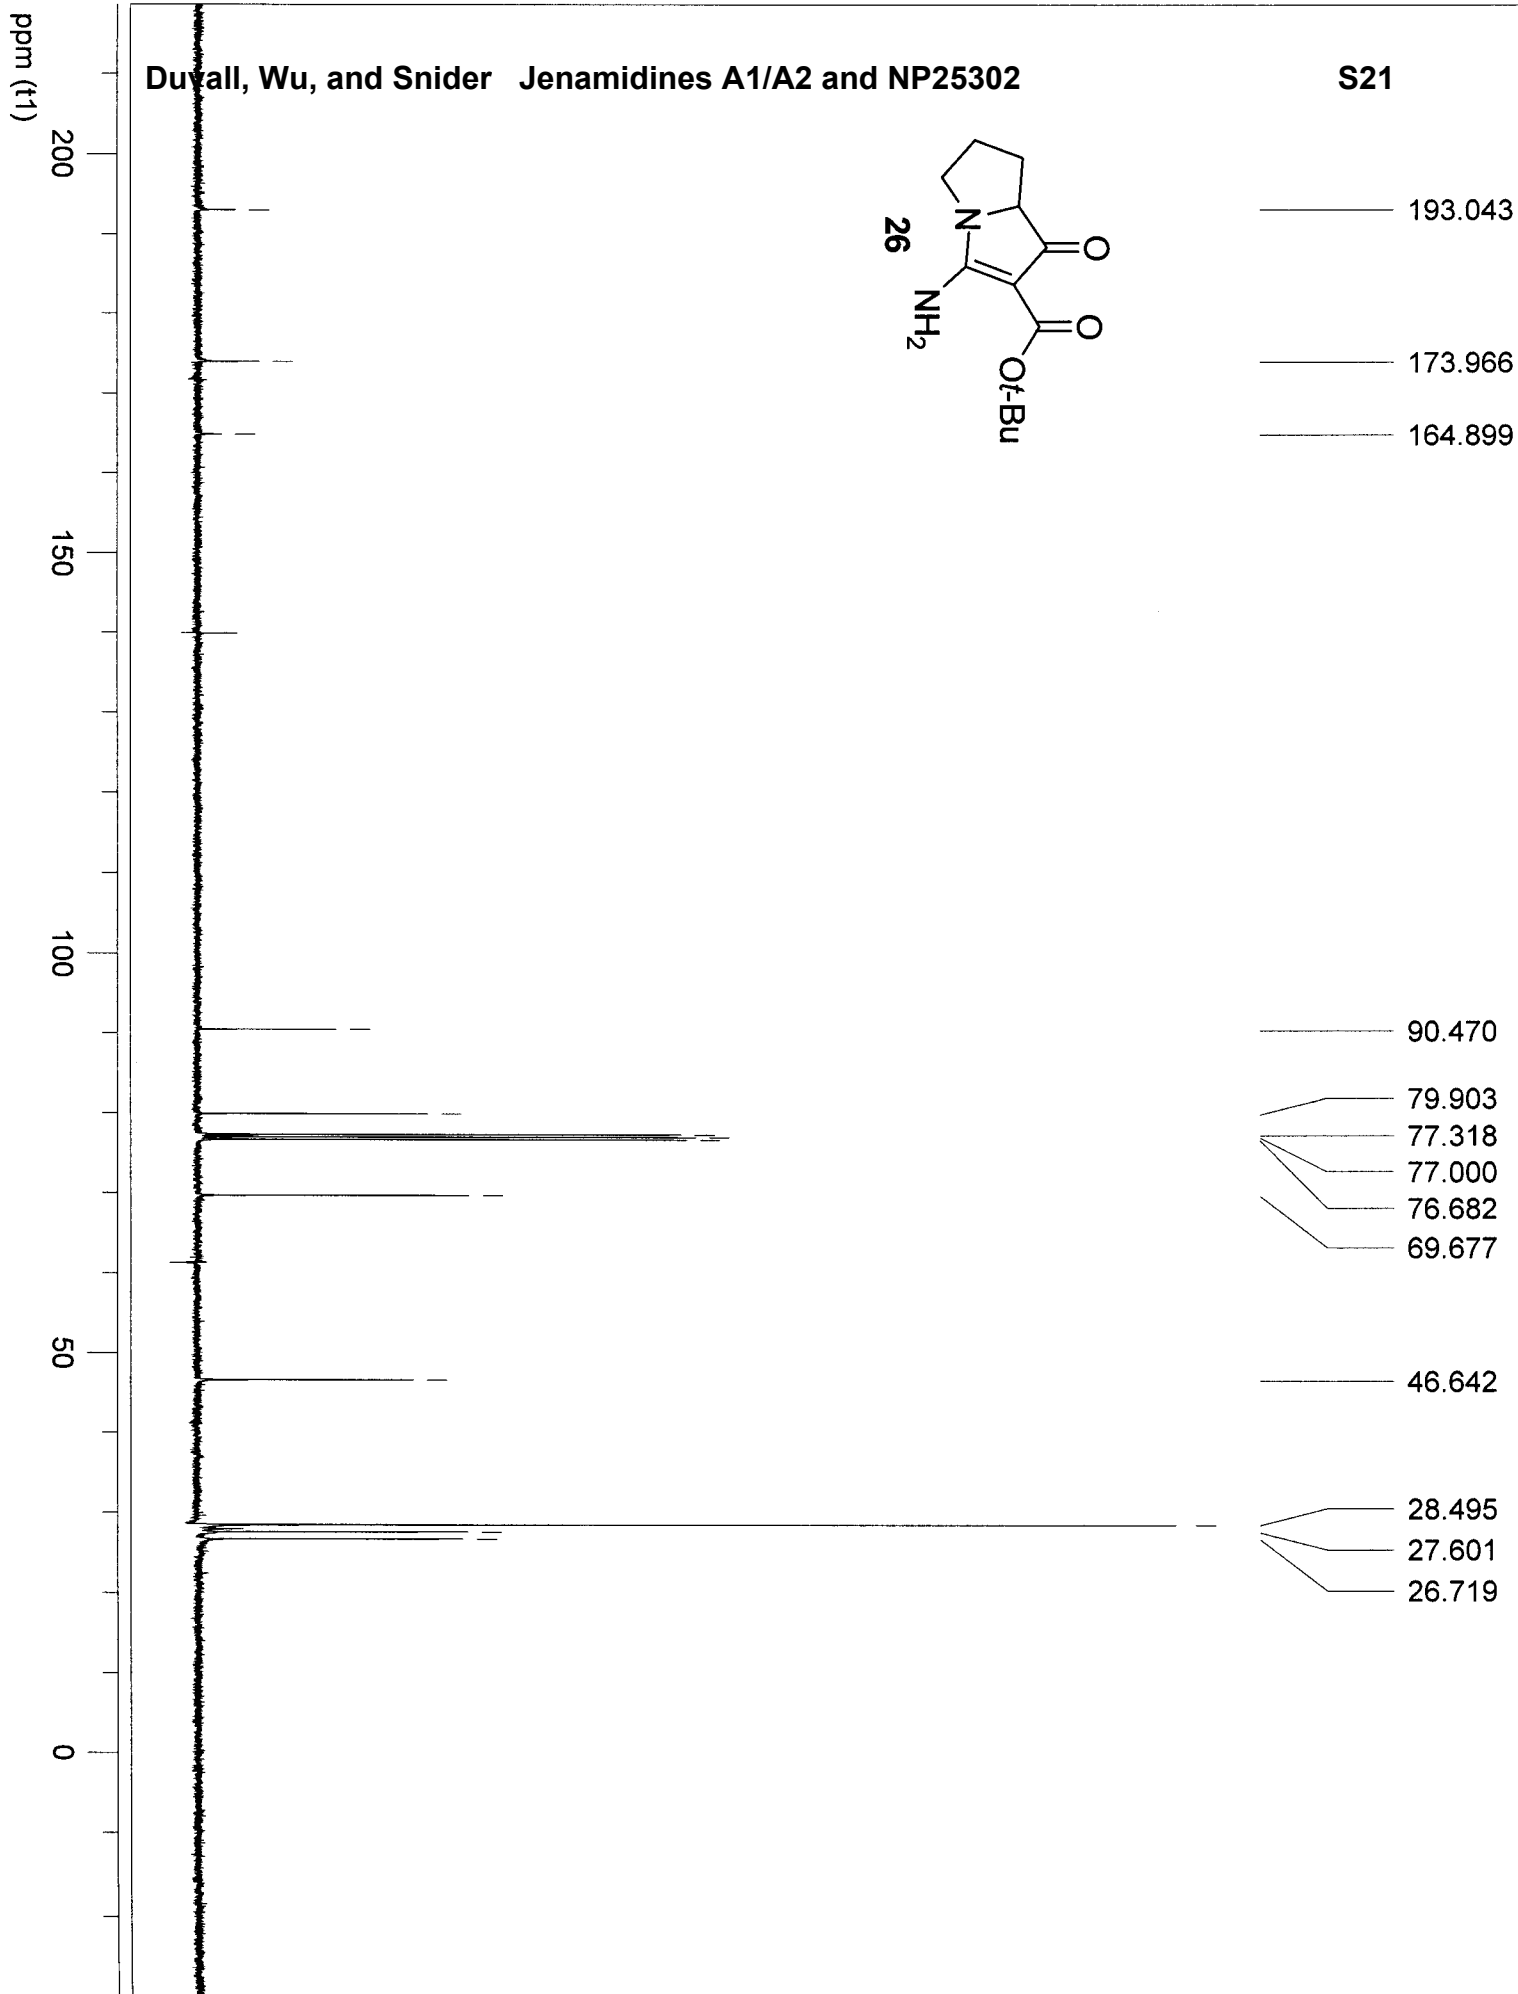

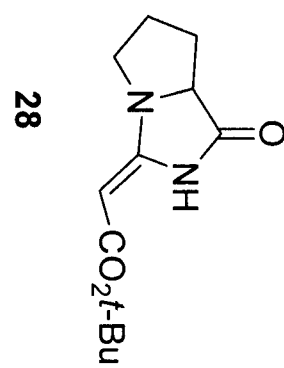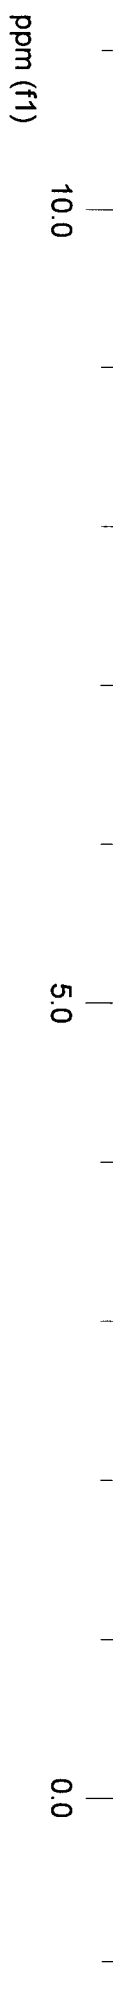

ppm (f1)

28

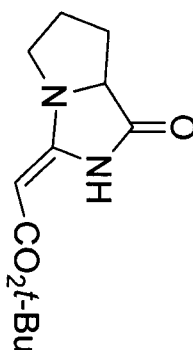

173.351  
169.445  
160.925

200  
150  
100  
50  
0

79.132  
77.319  
77.000  
76.682  
72.583  
63.622

49.948

28.413  
27.268  
27.096

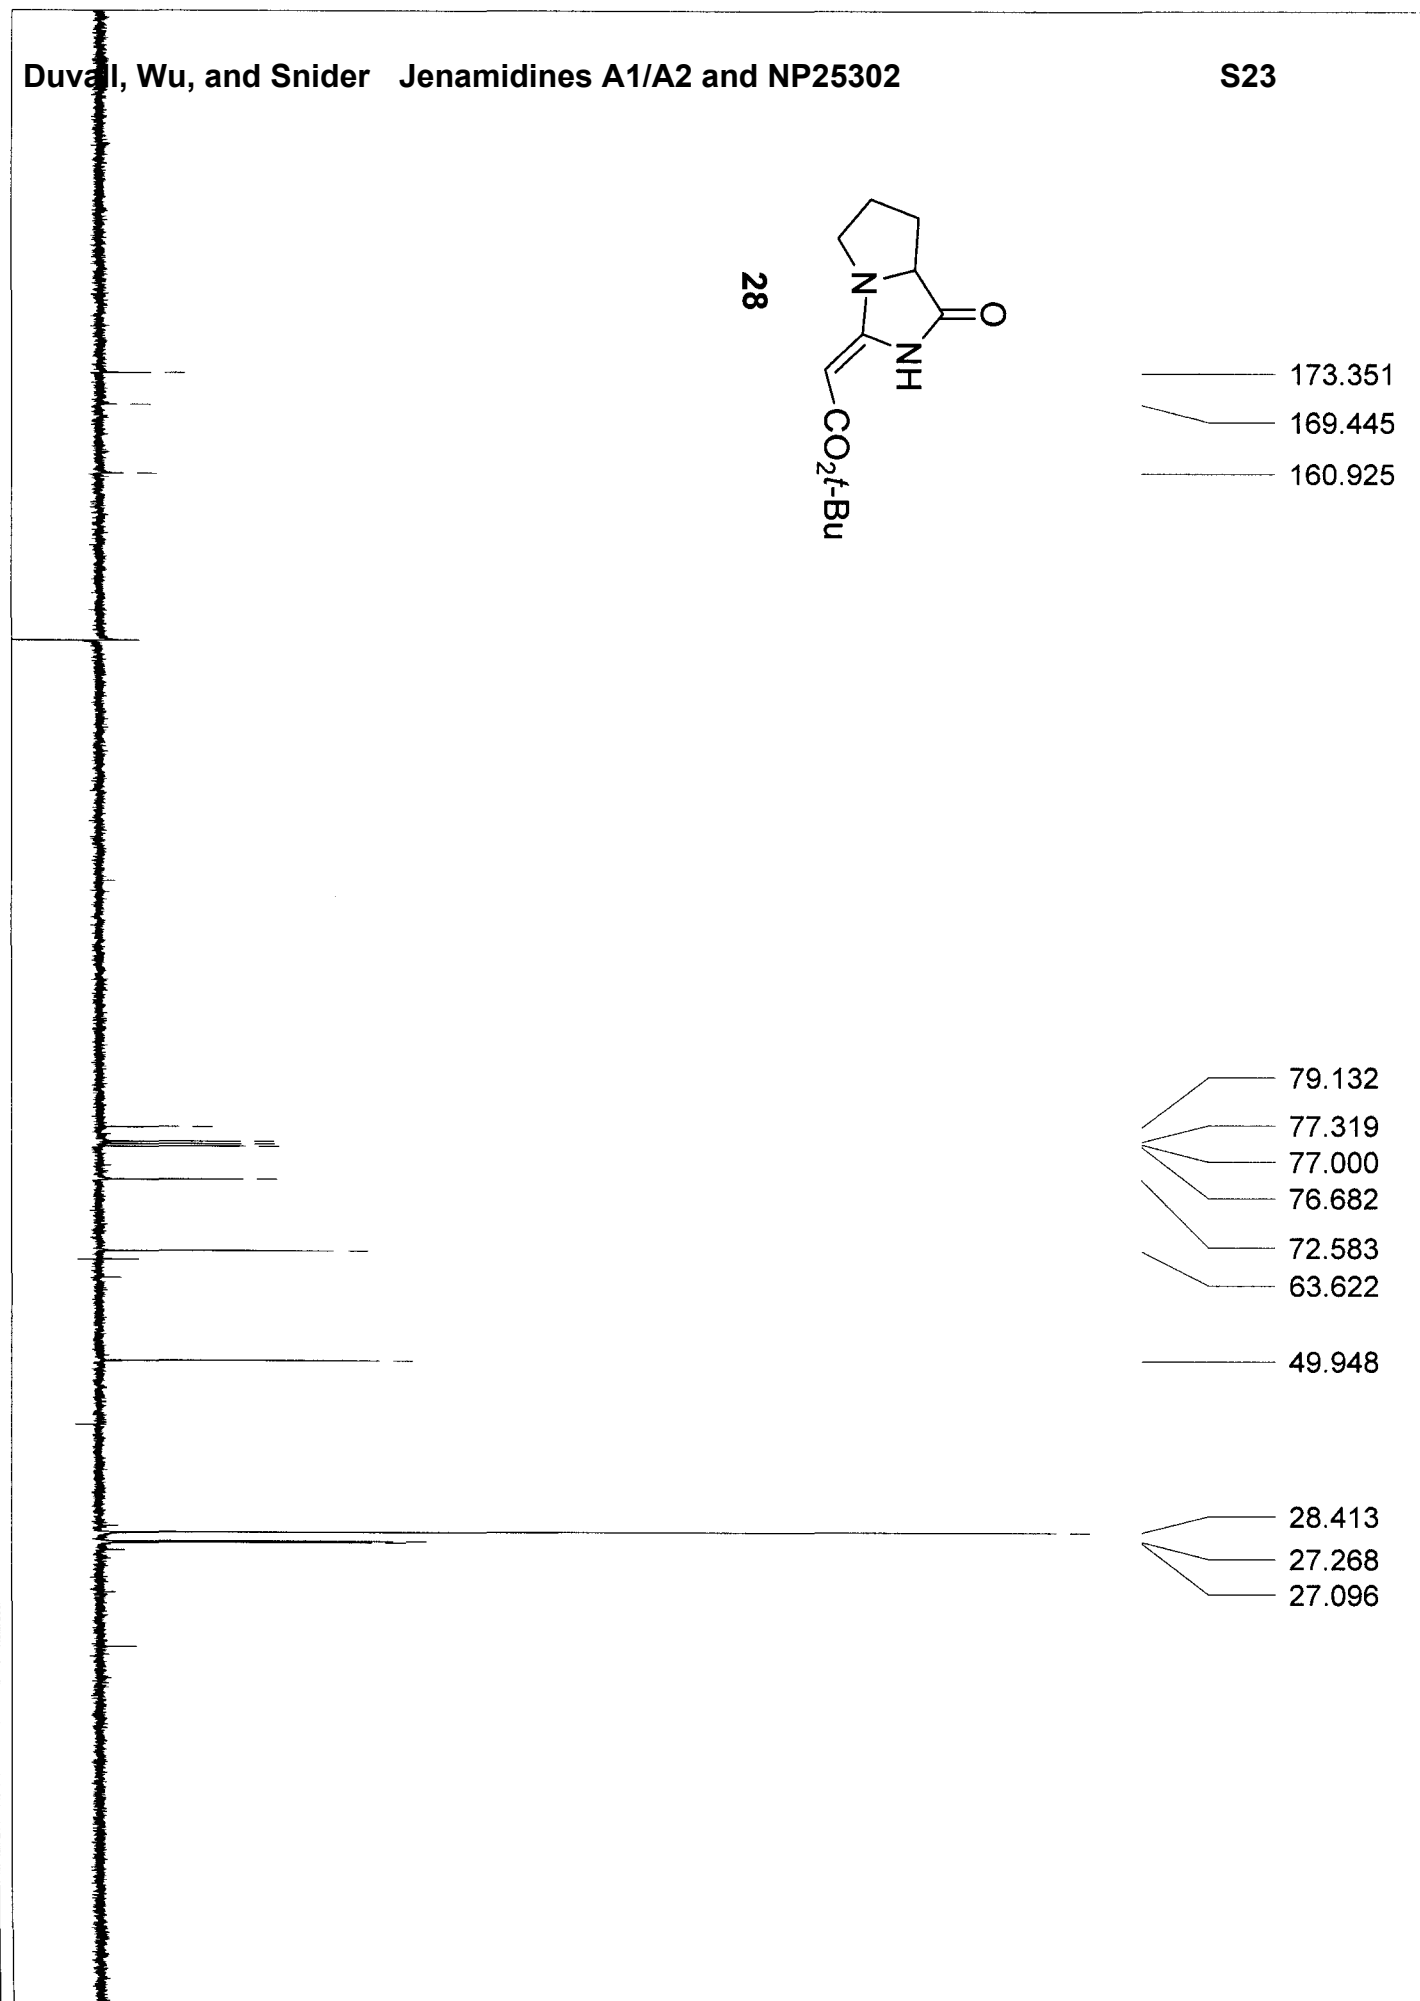

ppm (f1)

10.0

5.0

0.0

31

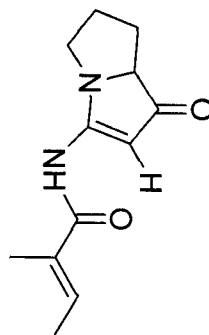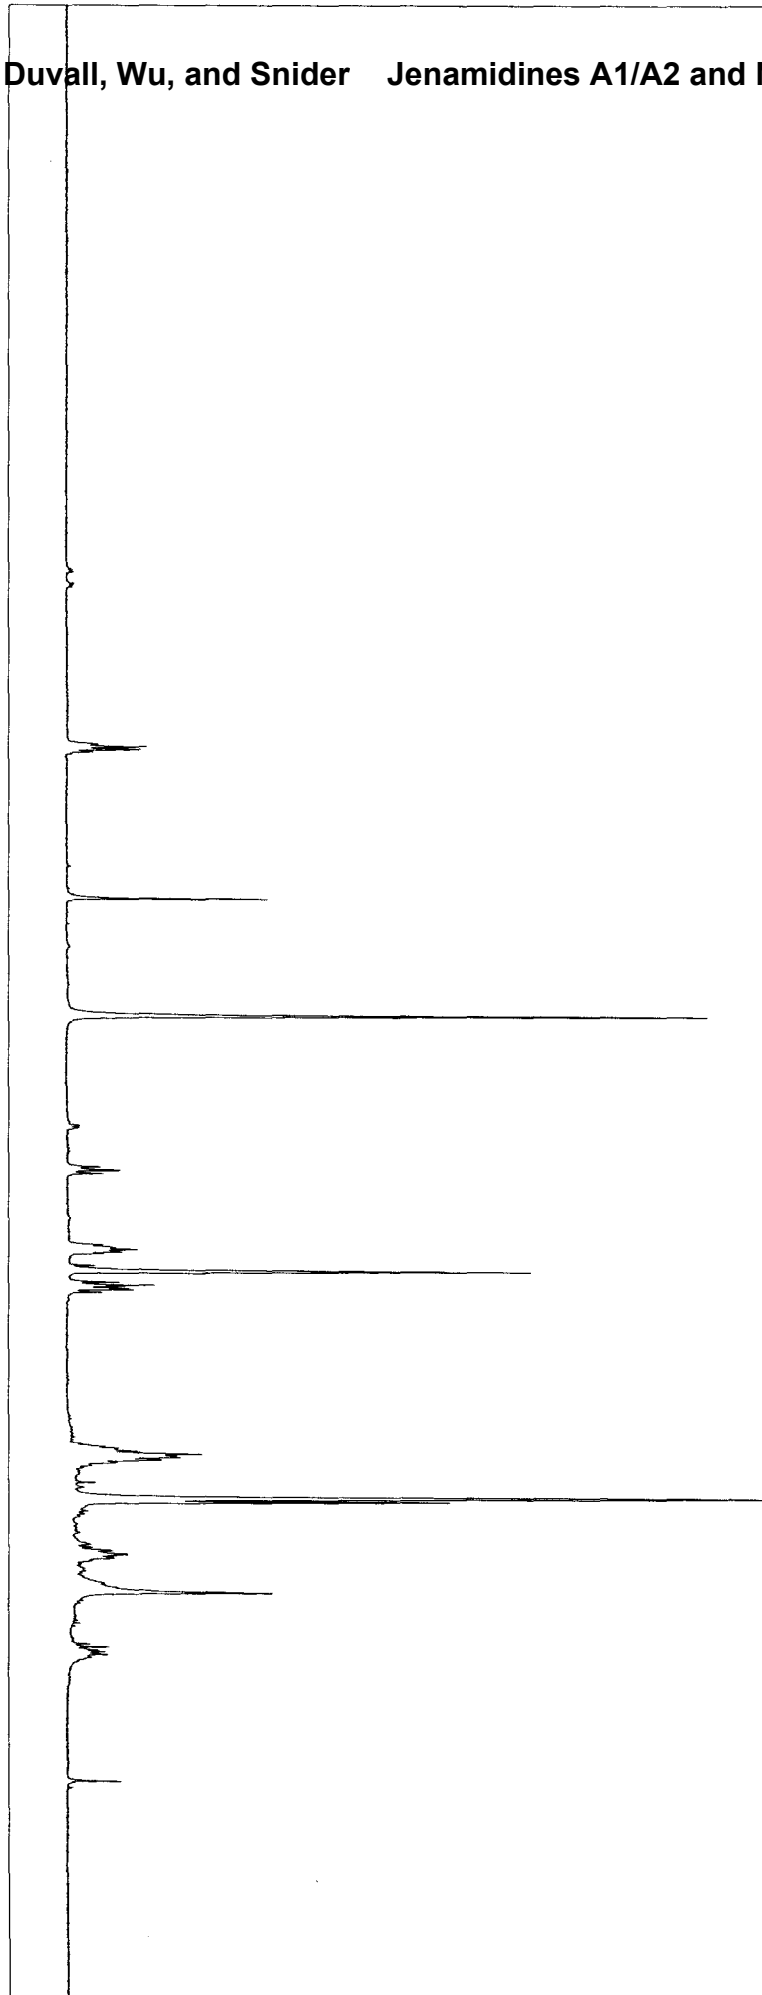



ppm (f1)

31

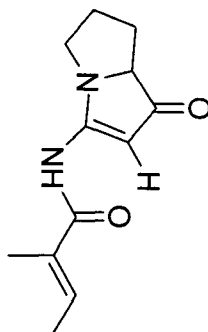

- 204.512
- 173.709
- 169.945
- 136.290
- 133.163
- 93.568
- 70.669
- 49.638
- 49.427
- 49.212
- 48.998
- 48.788
- 48.574
- 48.359
- 28.844
- 27.502
- 27.401
- 14.446
- 12.343

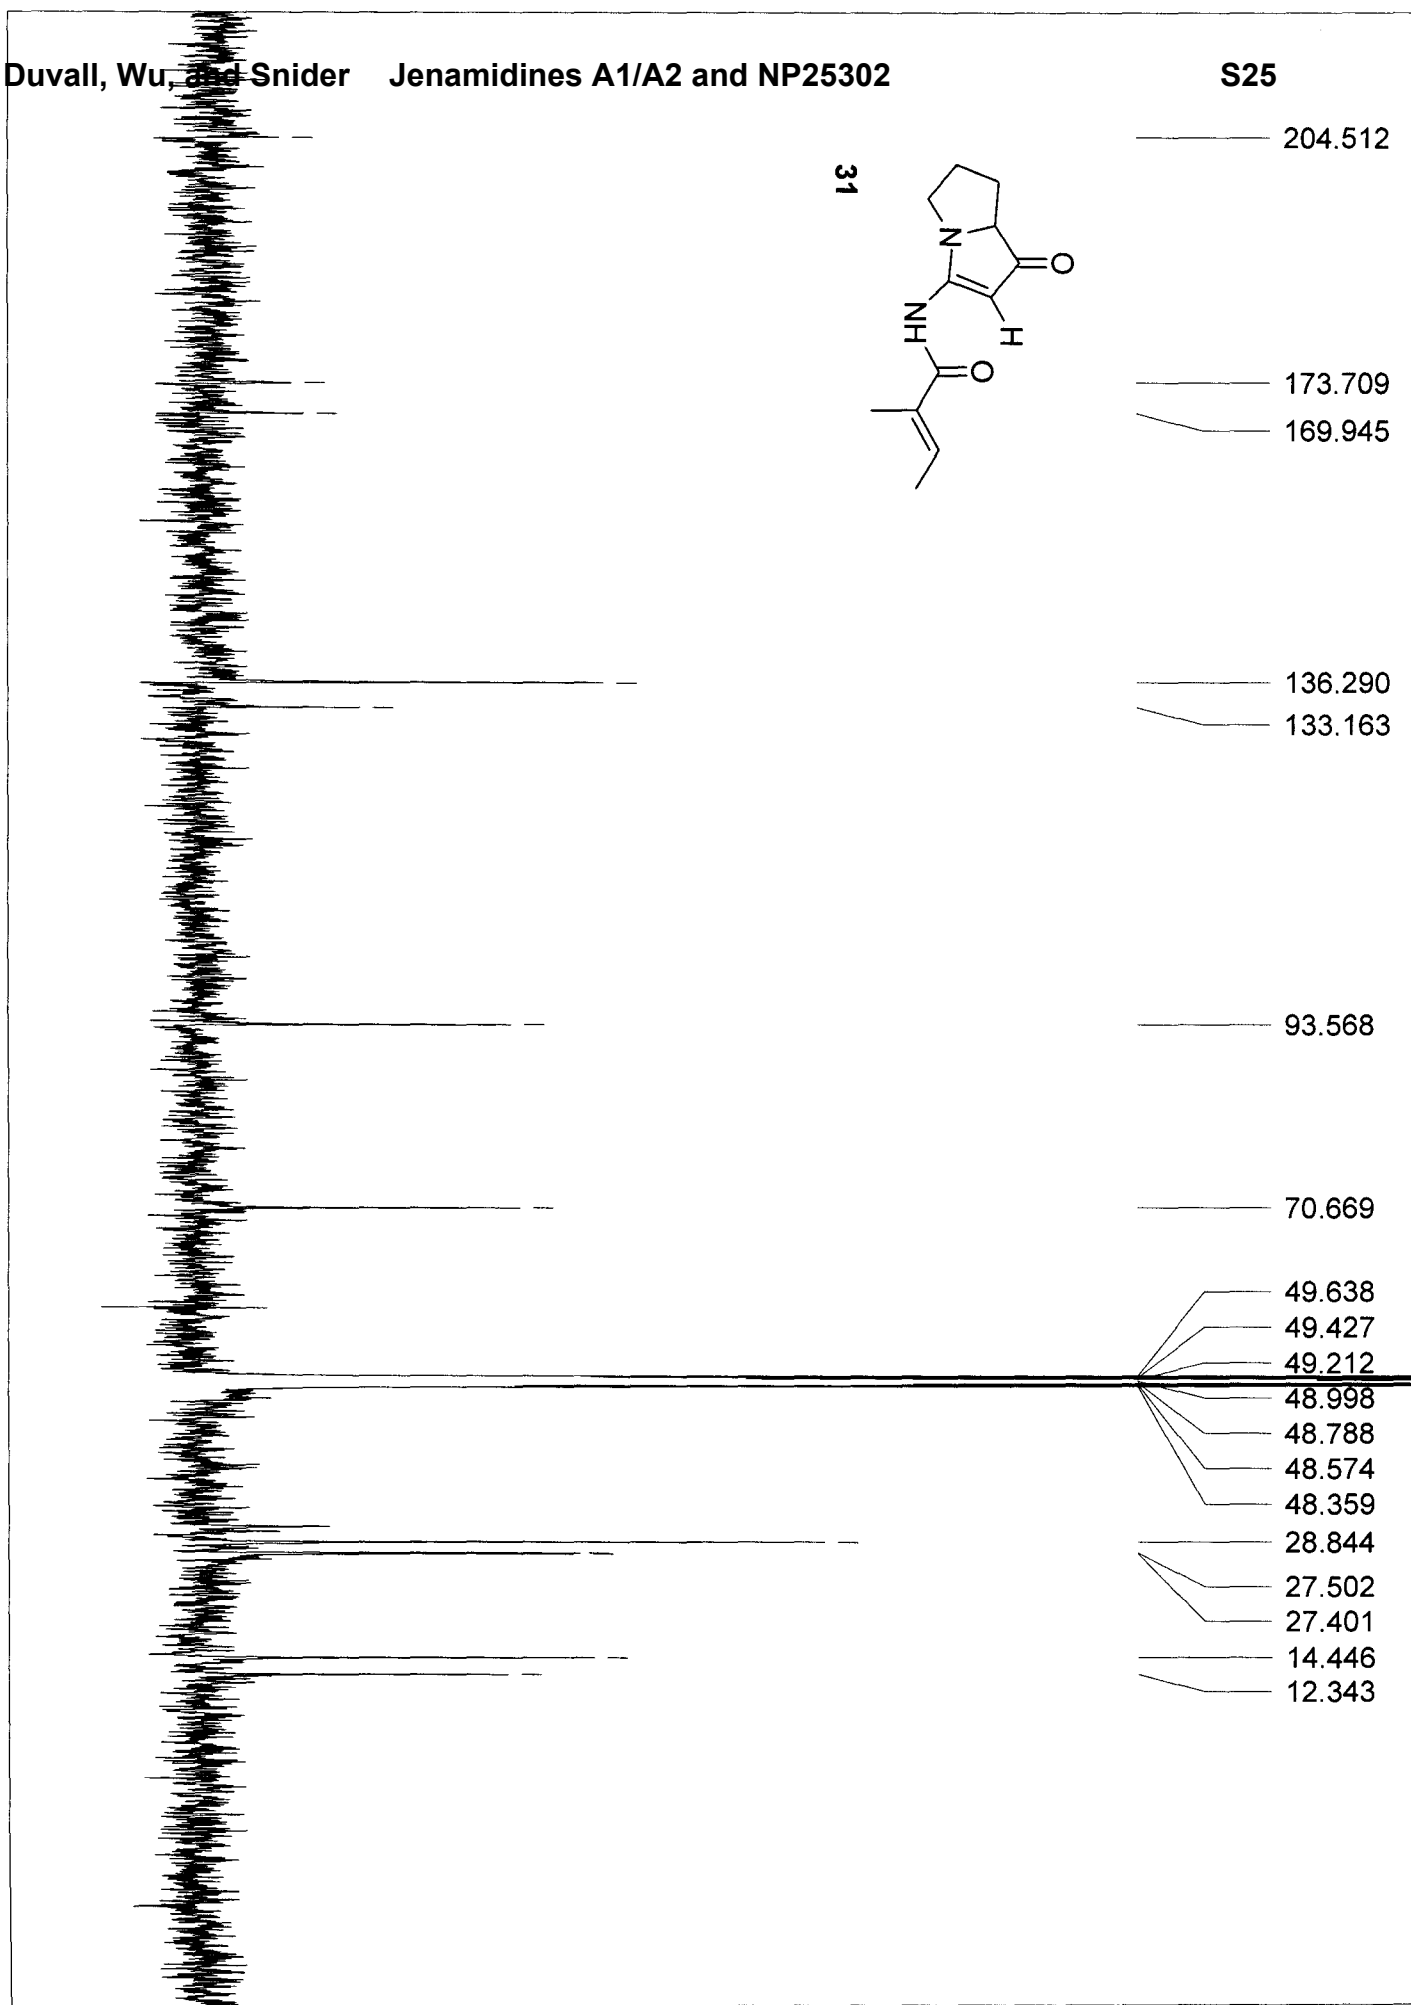

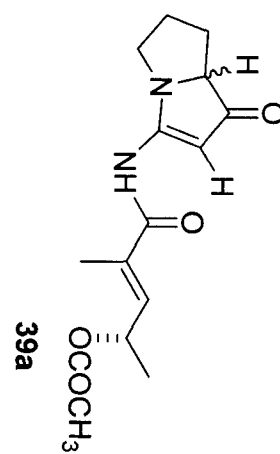

ppm (f1)

10.0

5.0

0.0

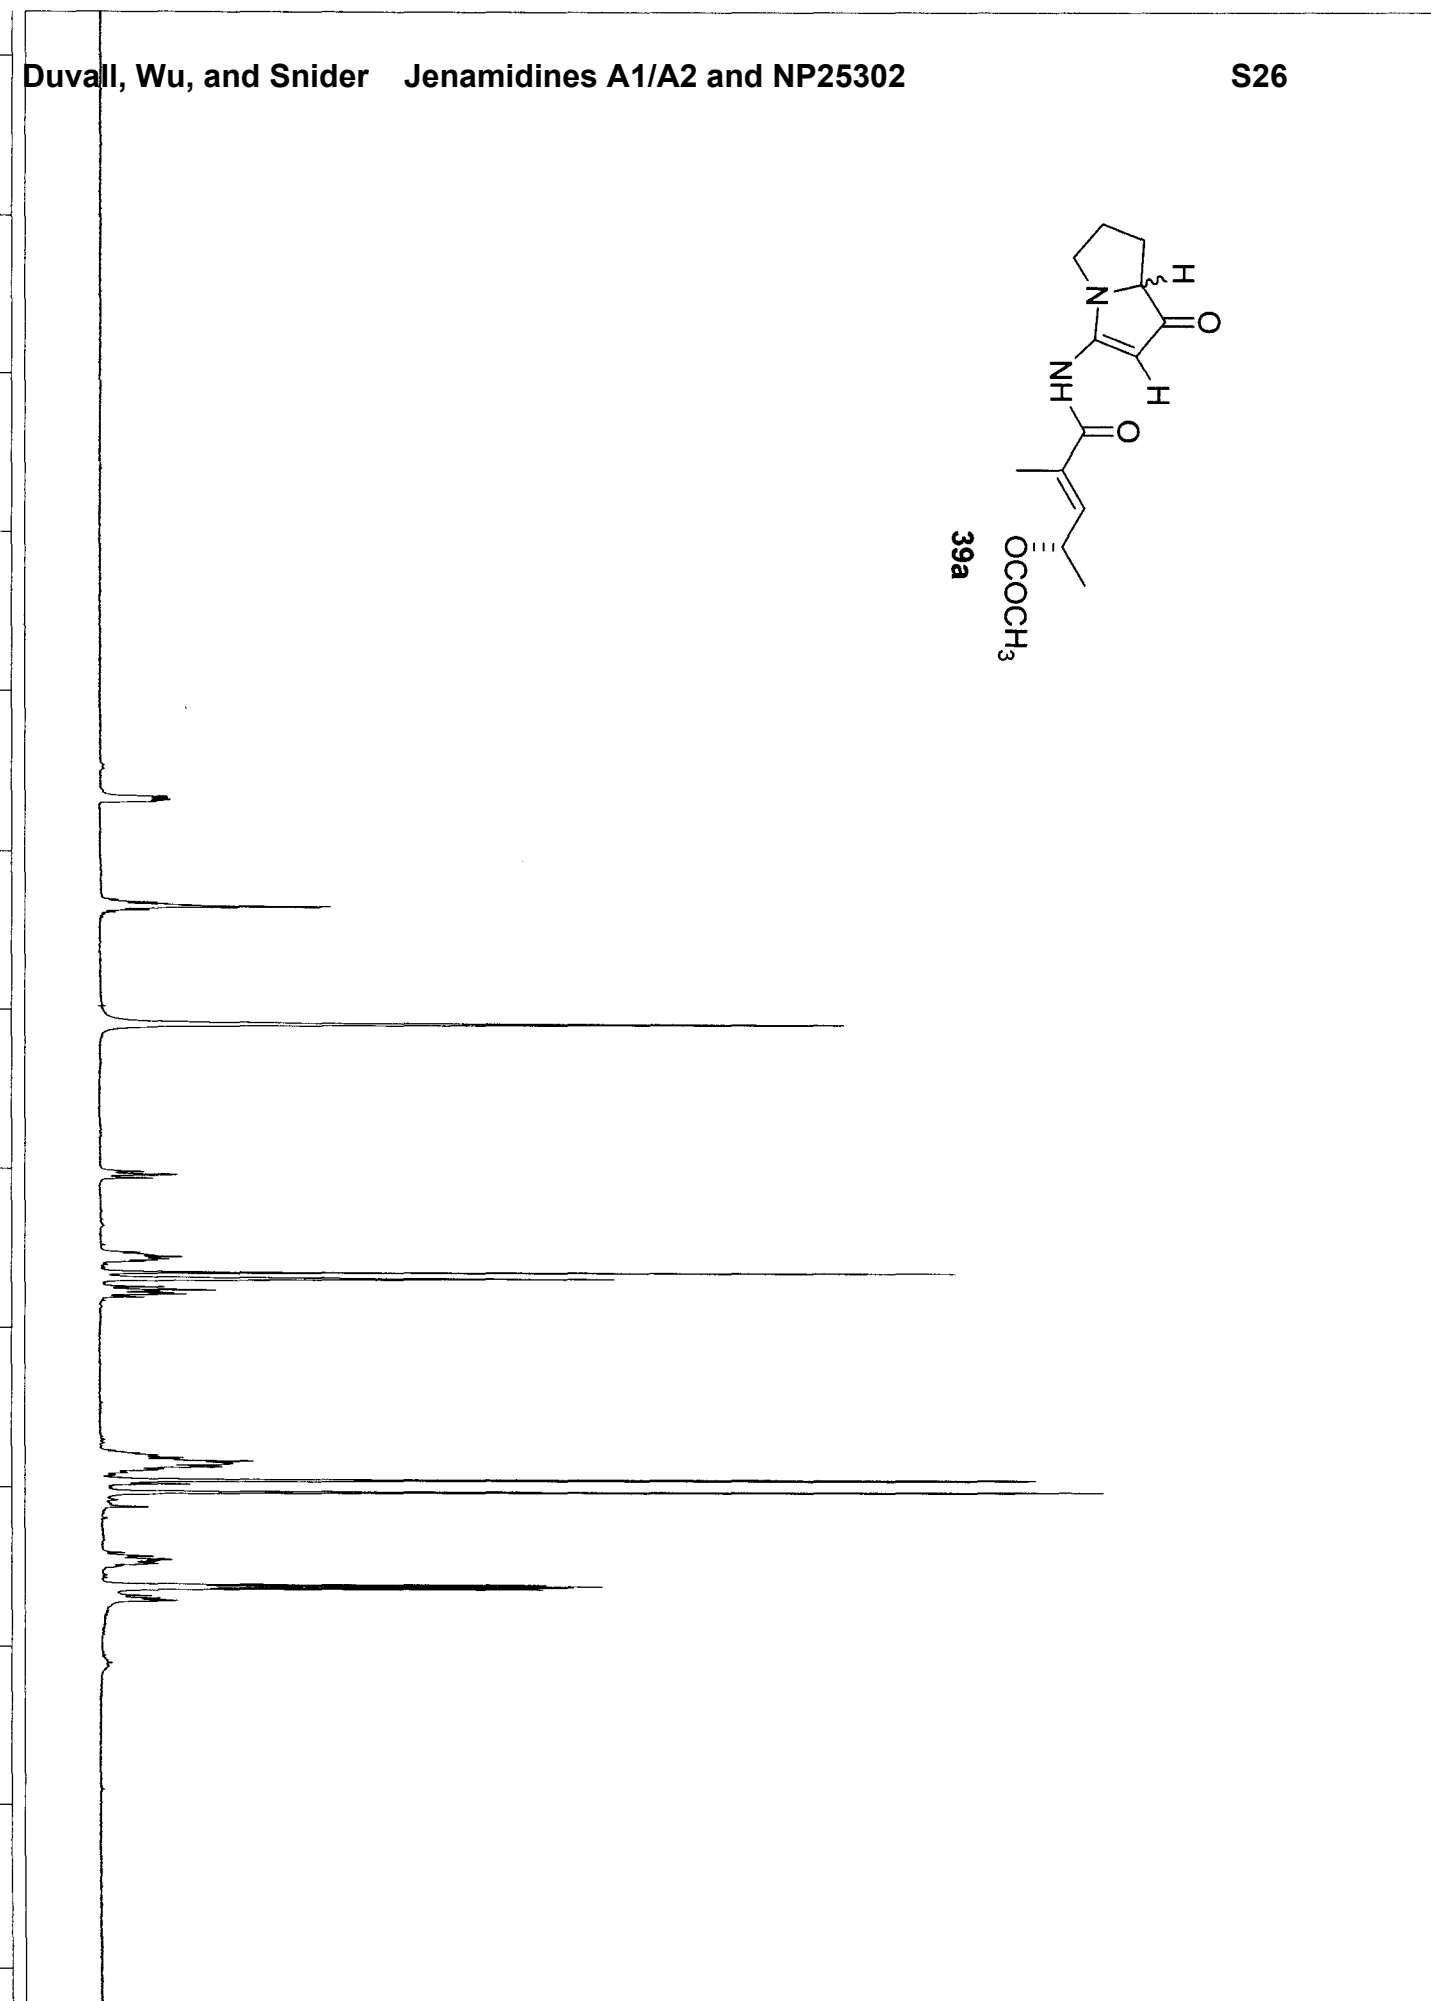

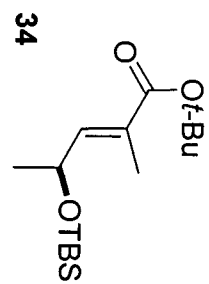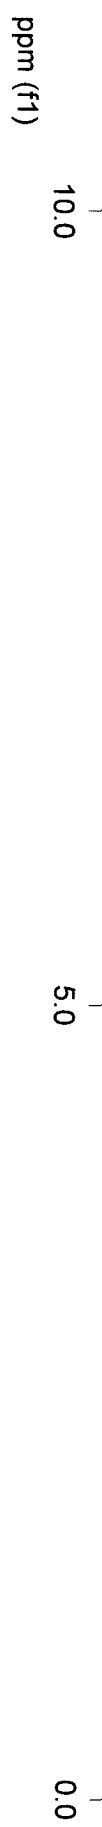

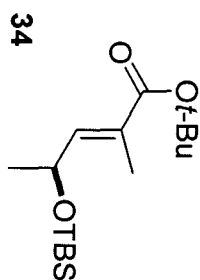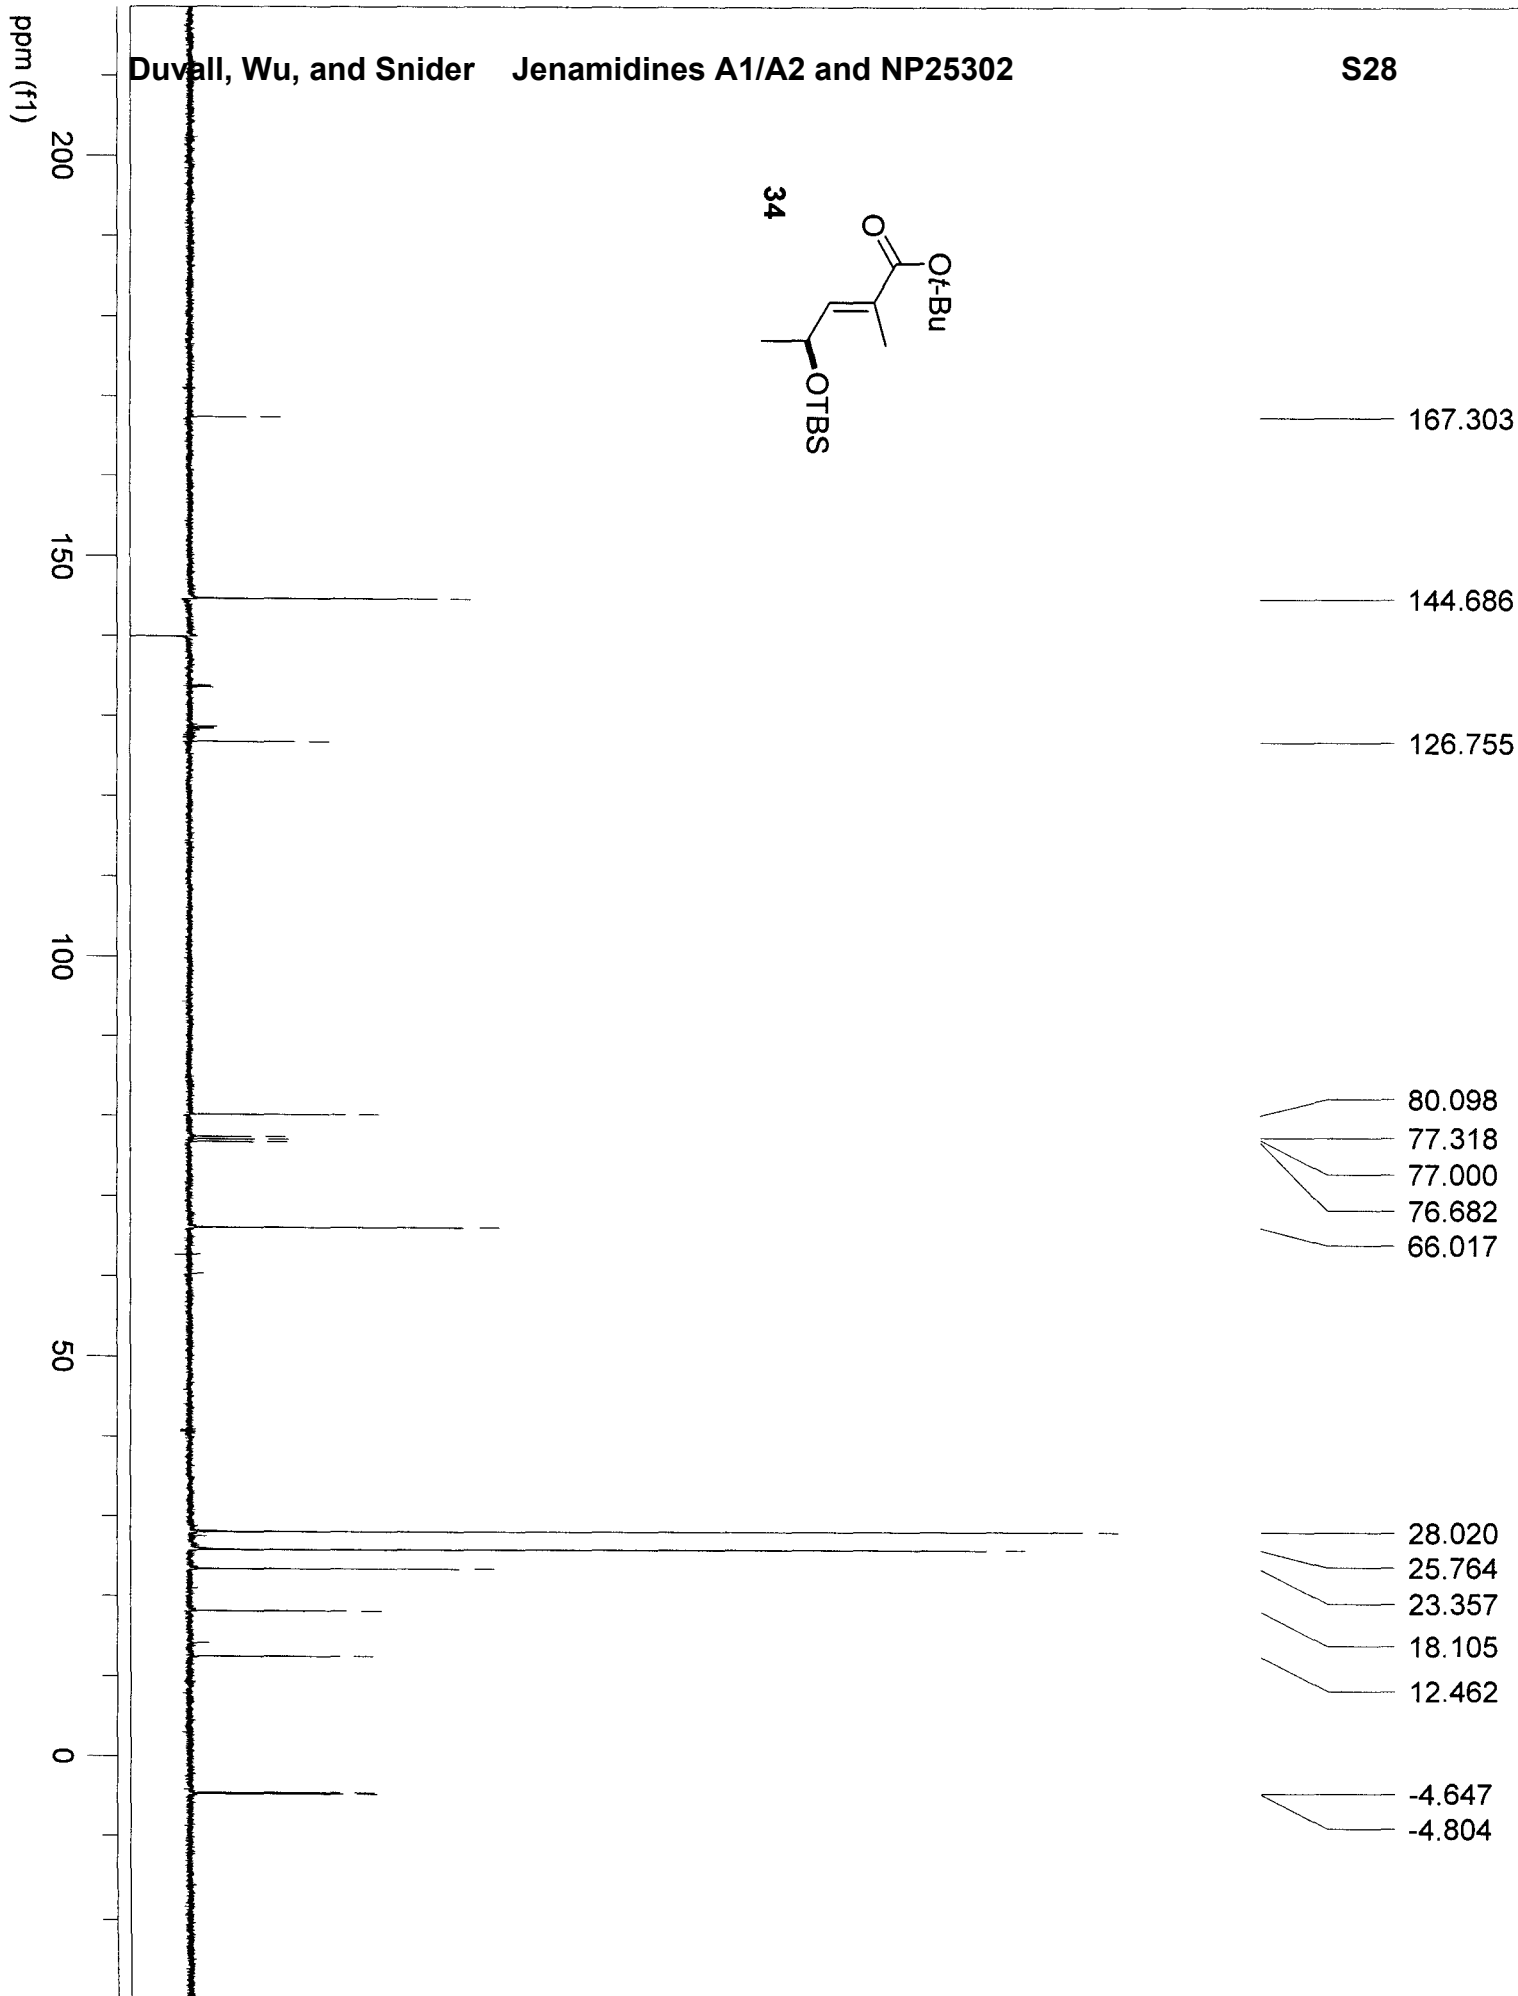

ppm (f1)

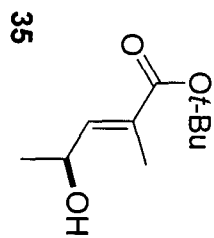

10.0

5.0

0.0

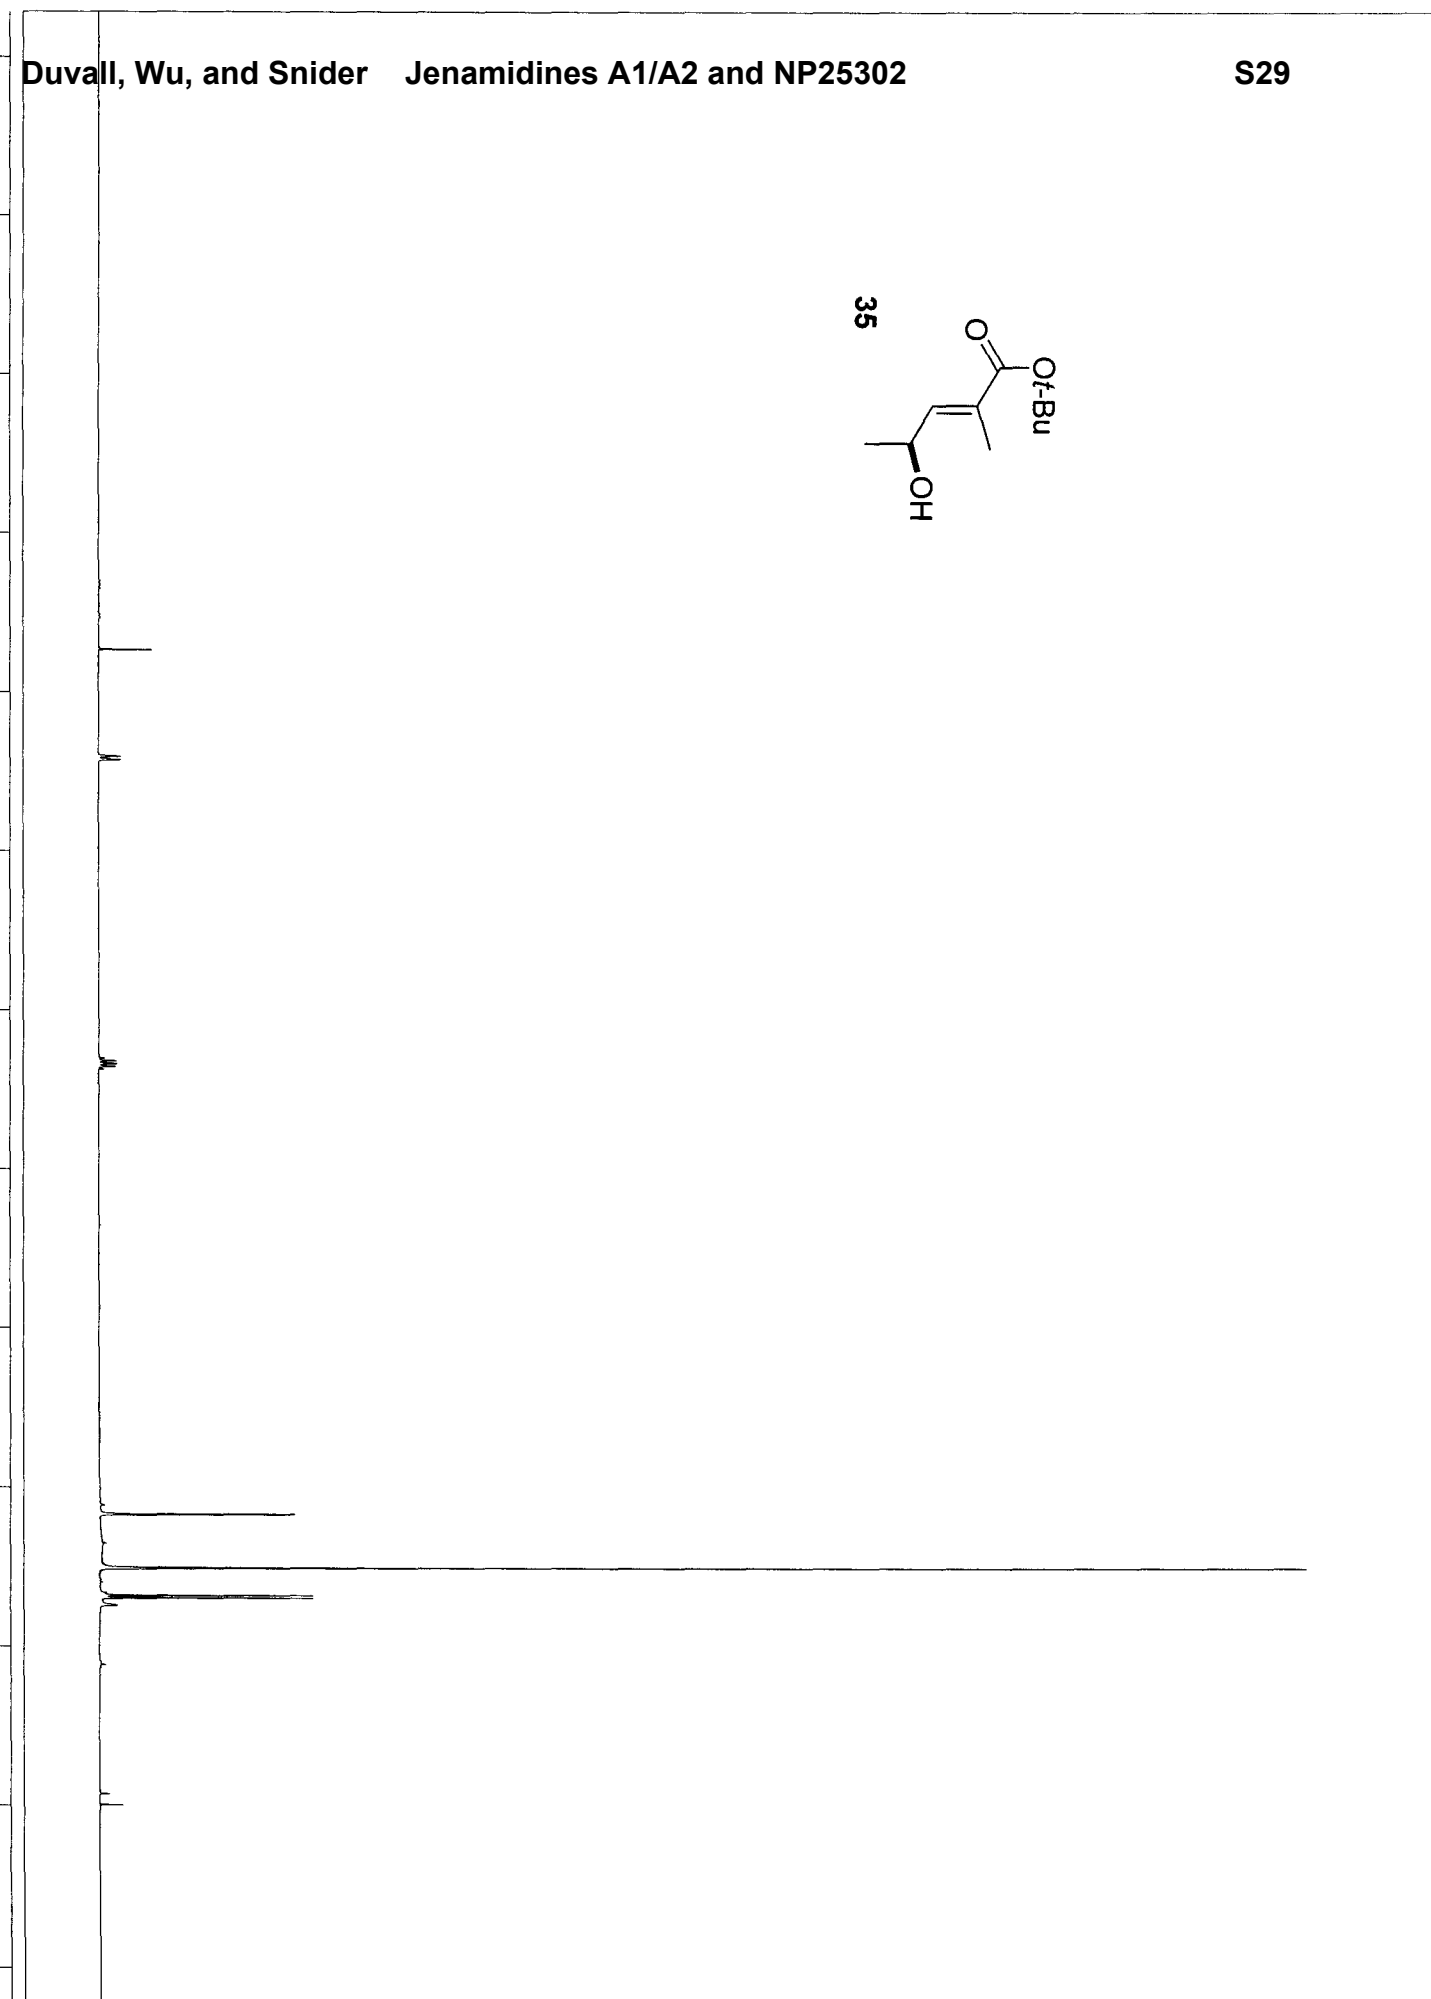

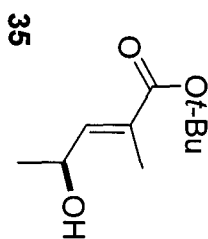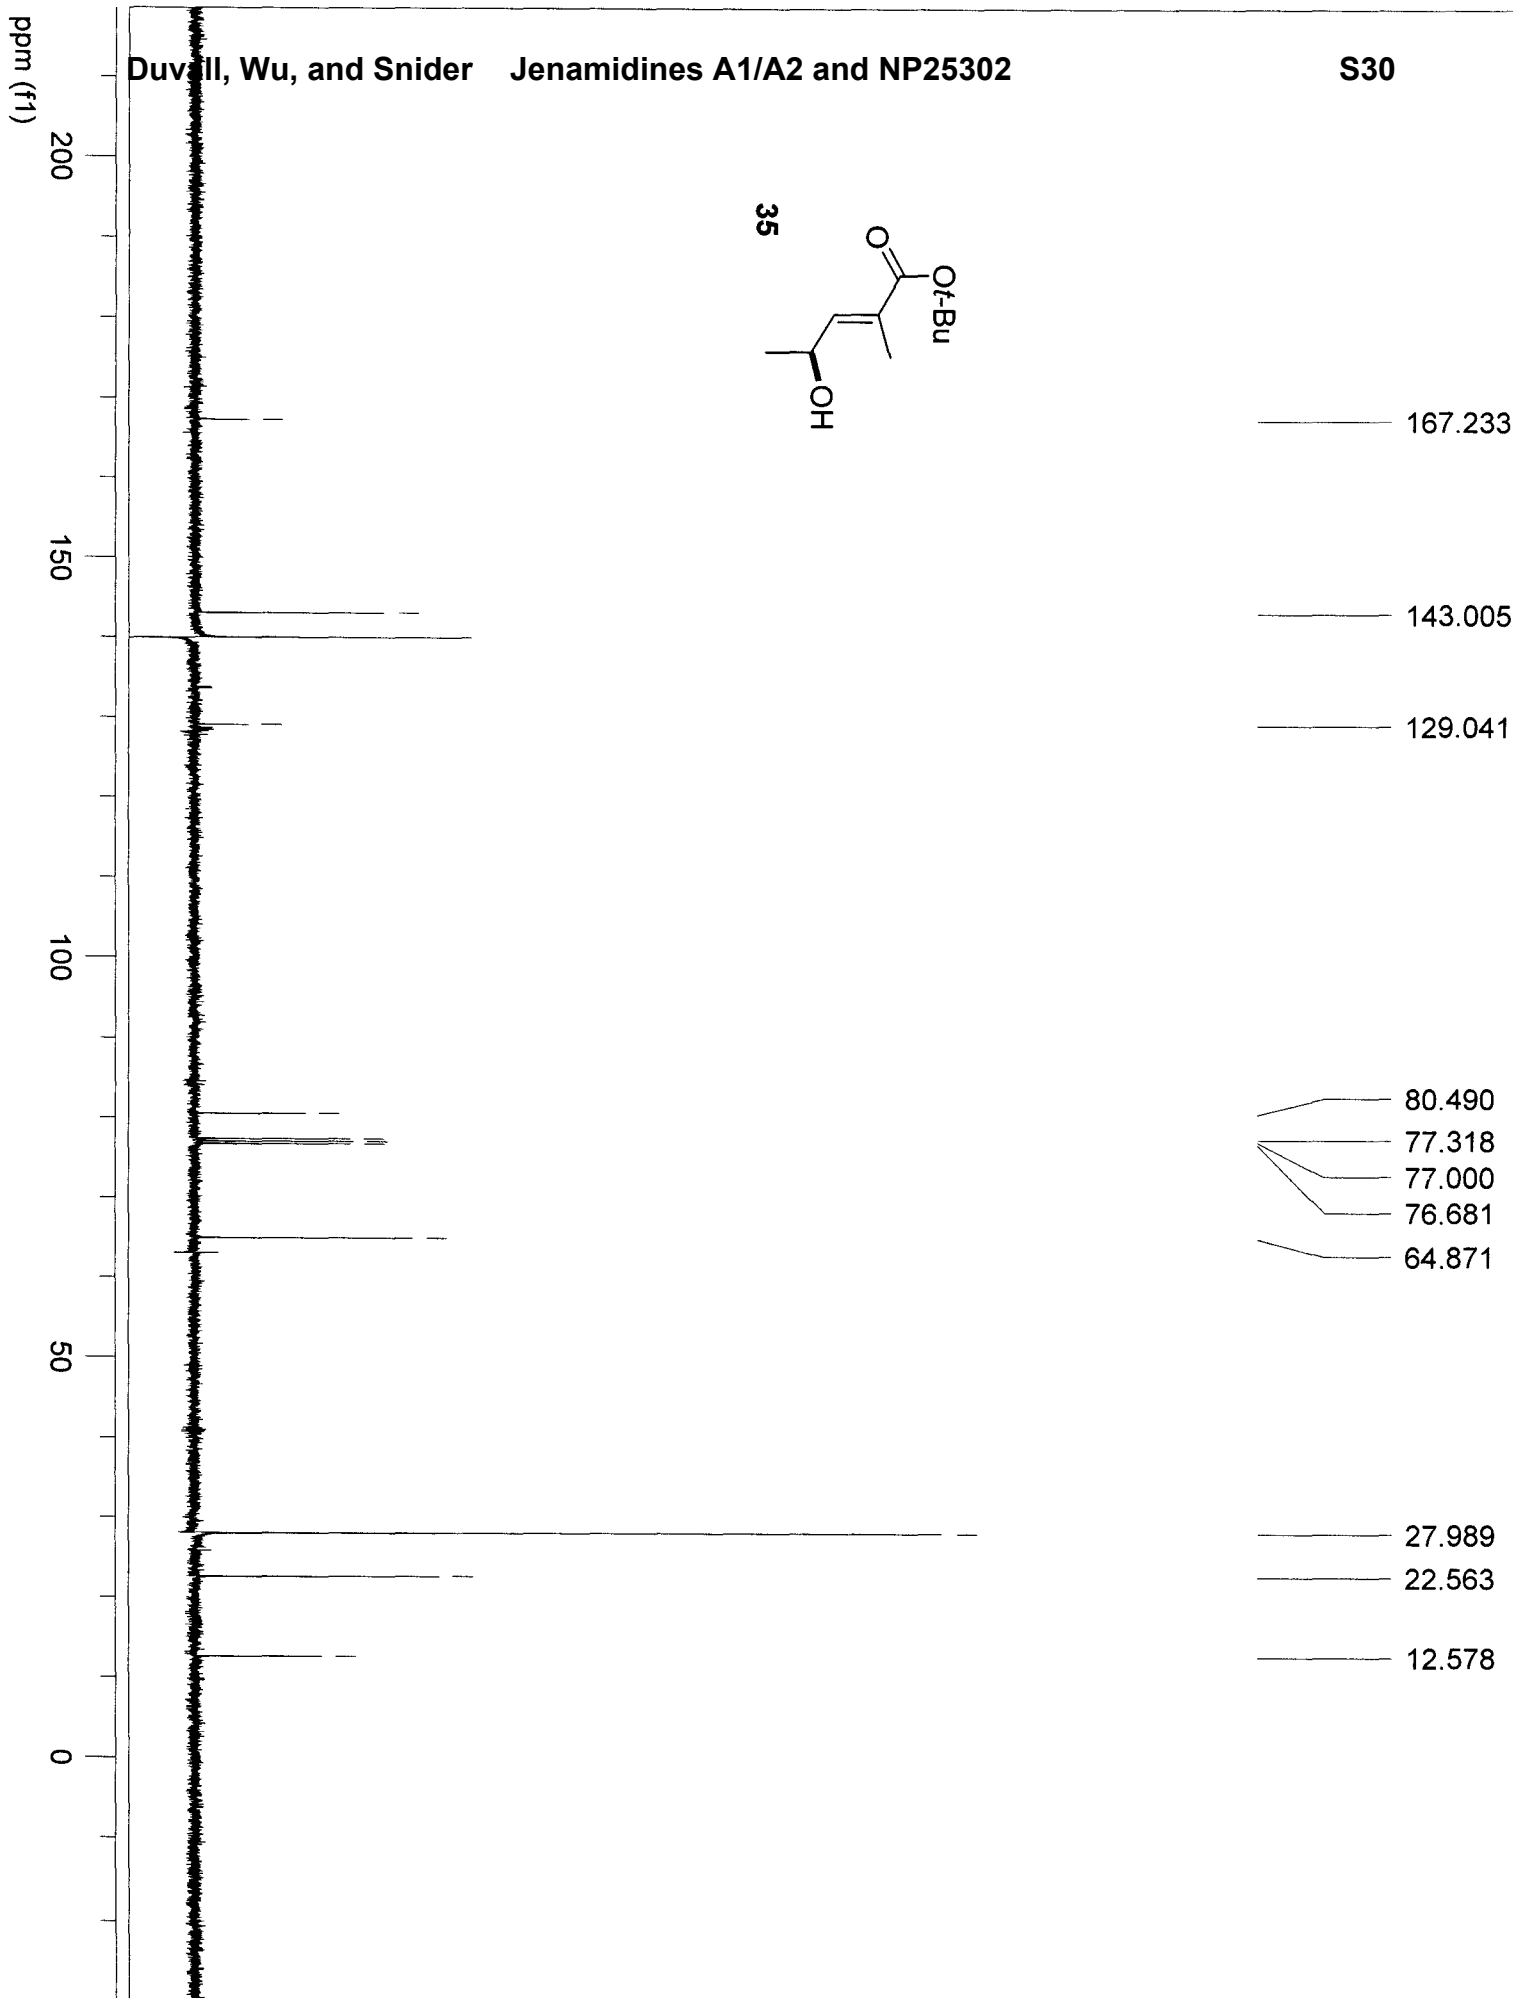

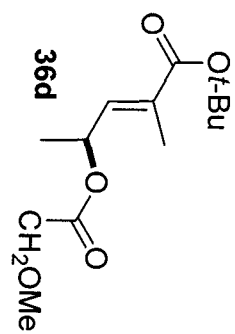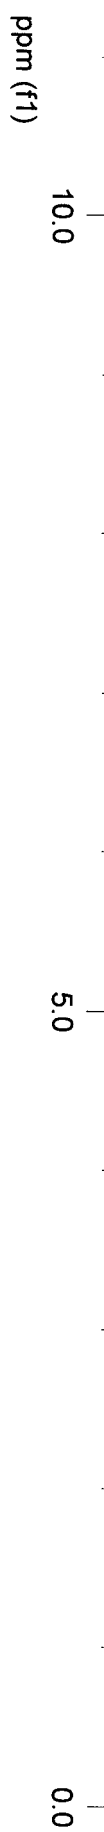

ppm (f1)

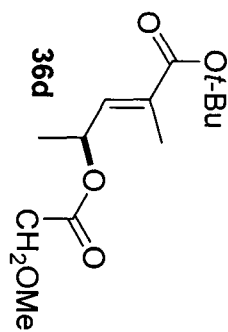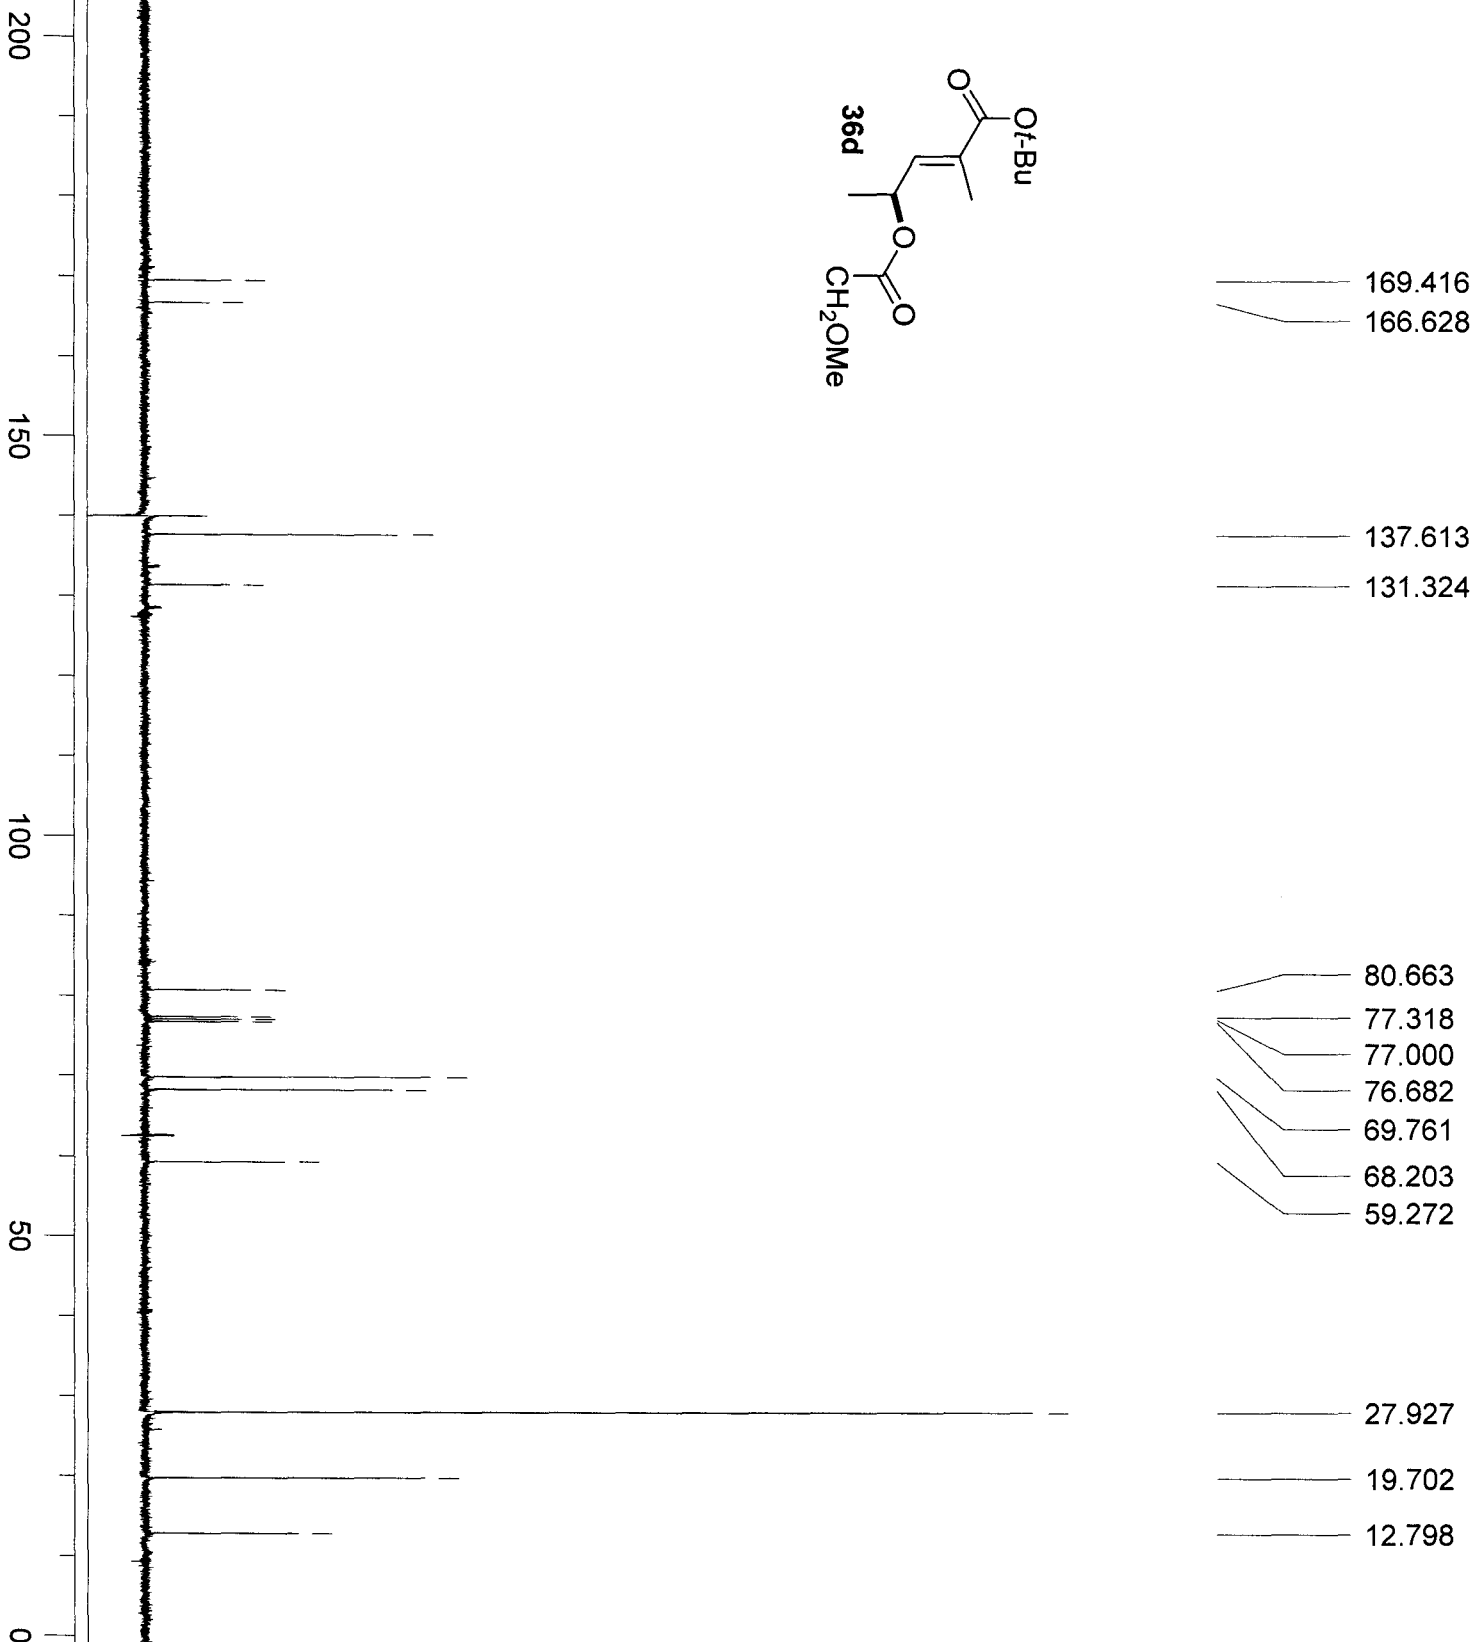



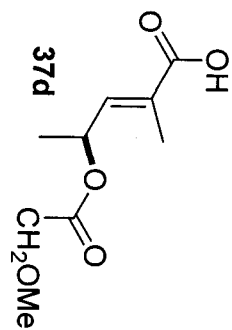

ppm (f1)

10.0

5.0

0.0

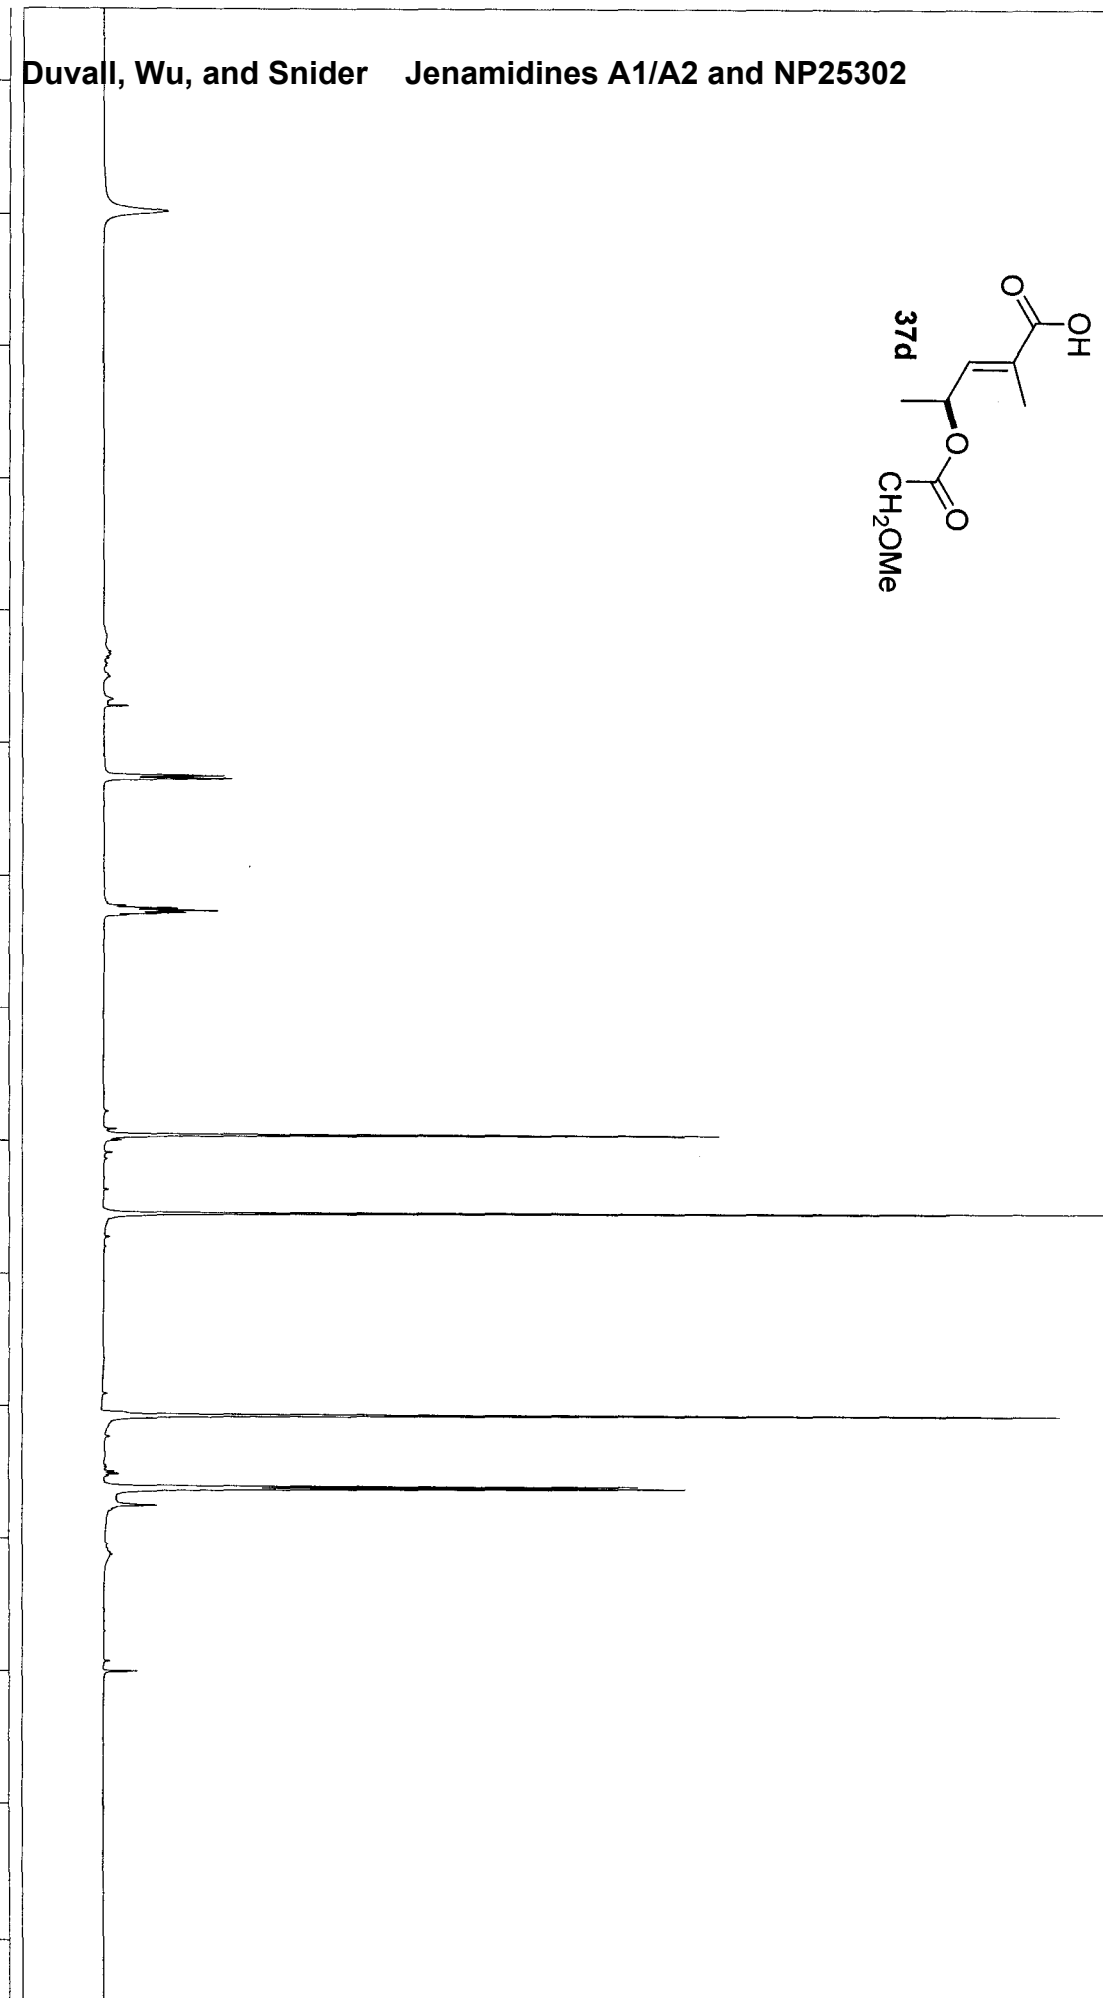

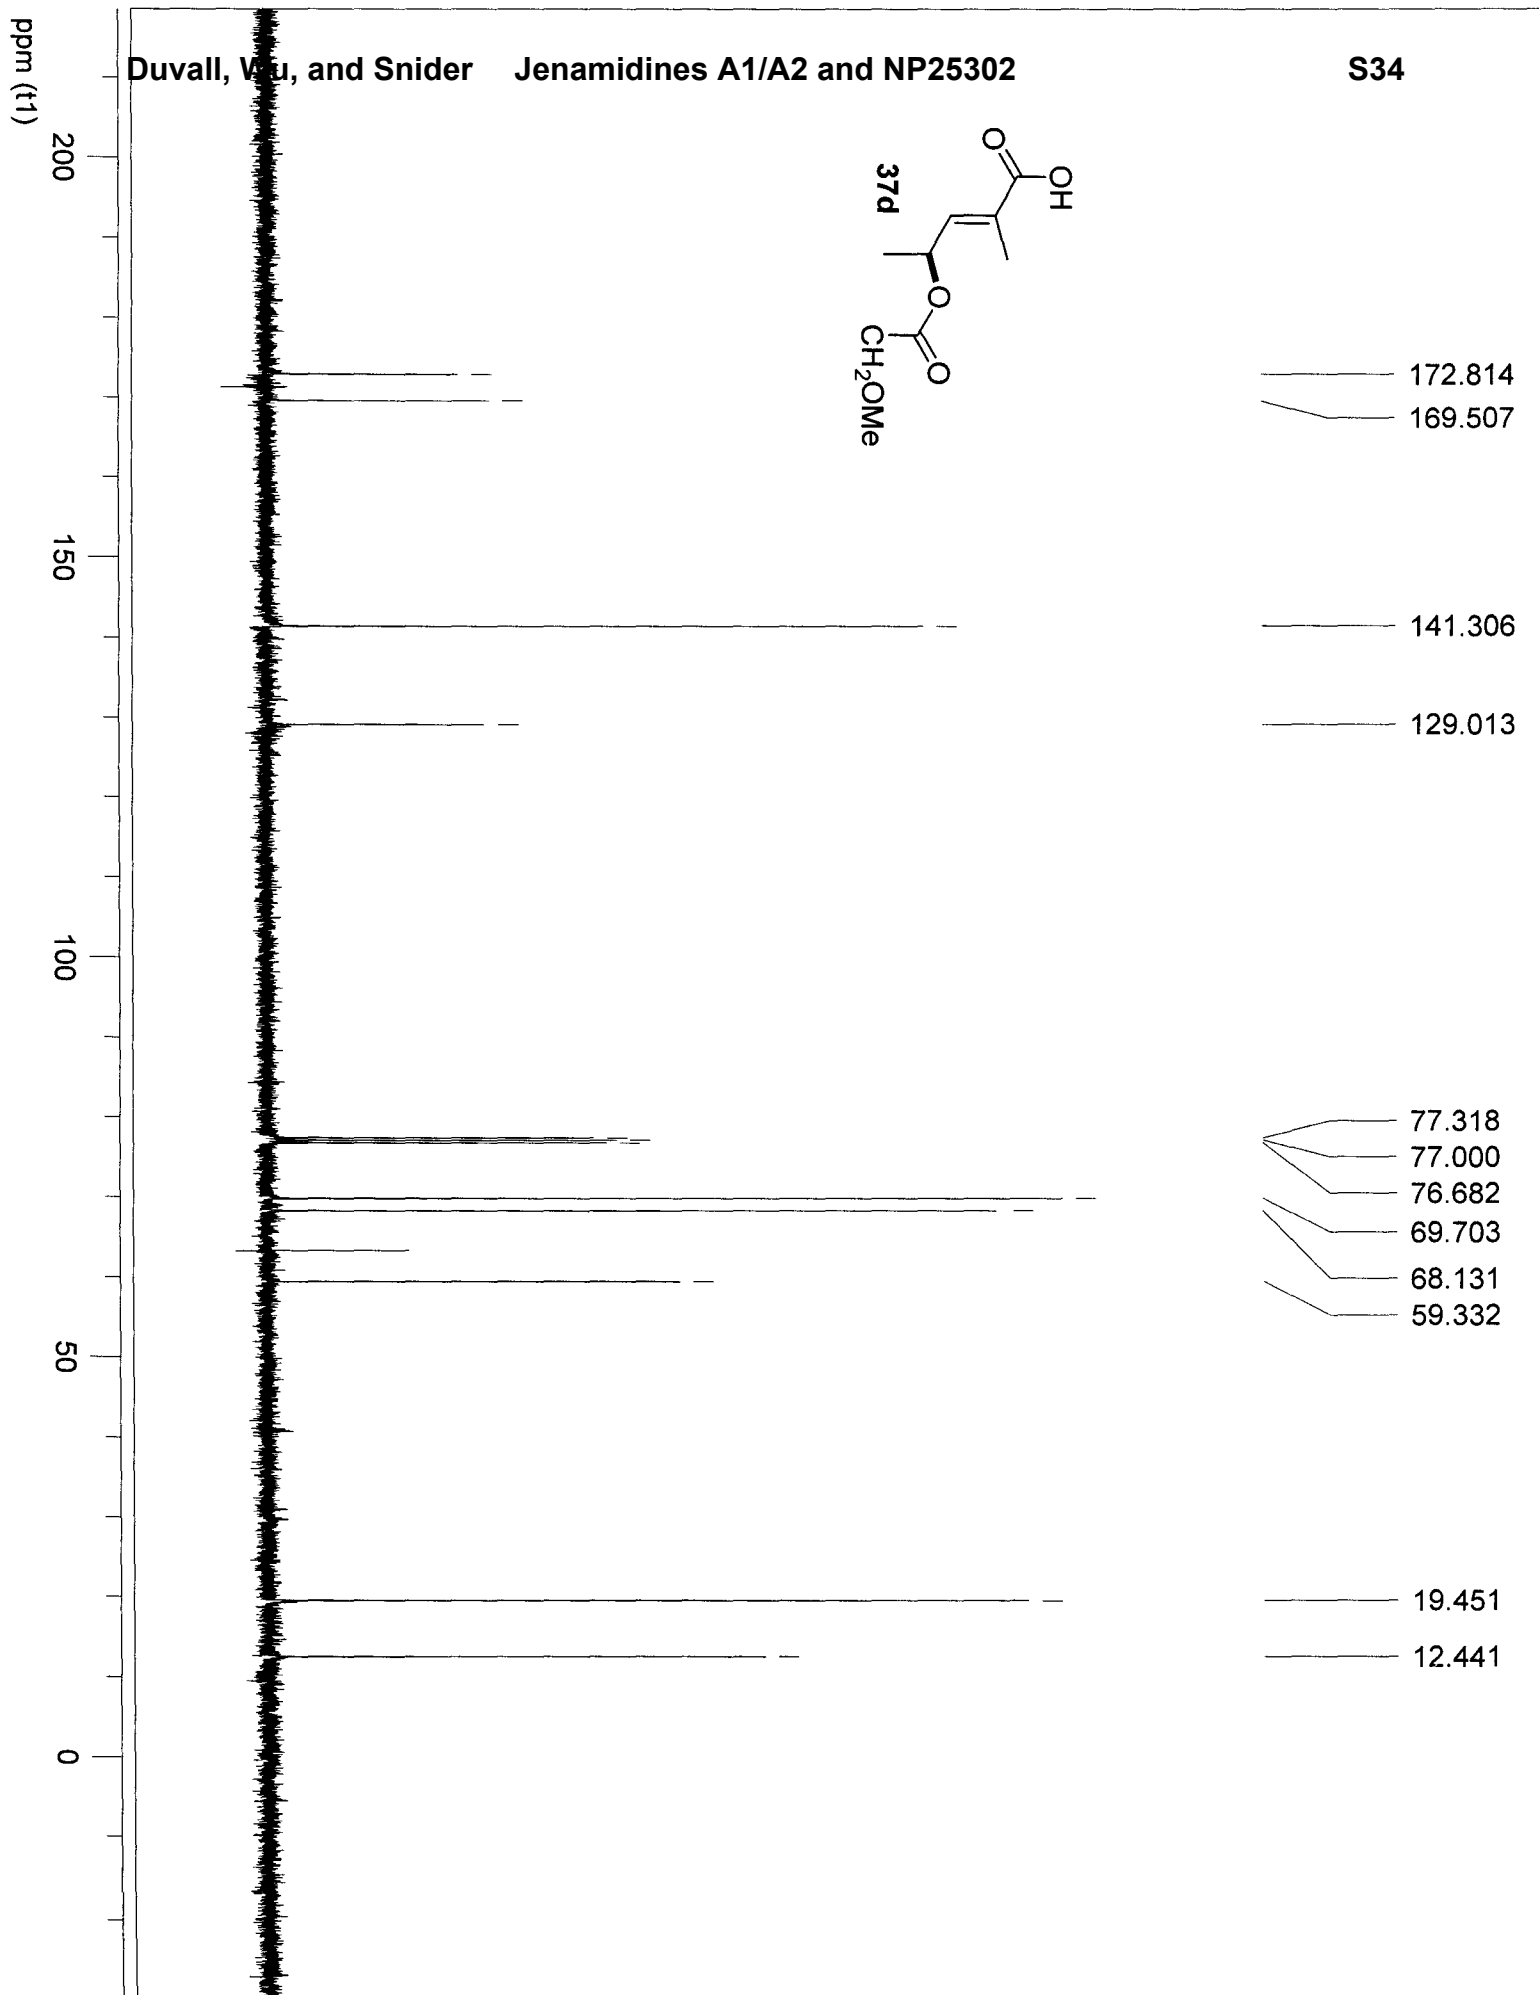

ppm (f1)

10.0

5.0

0.0

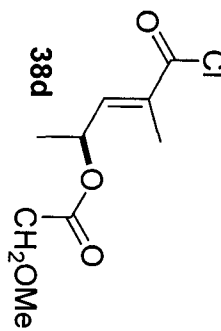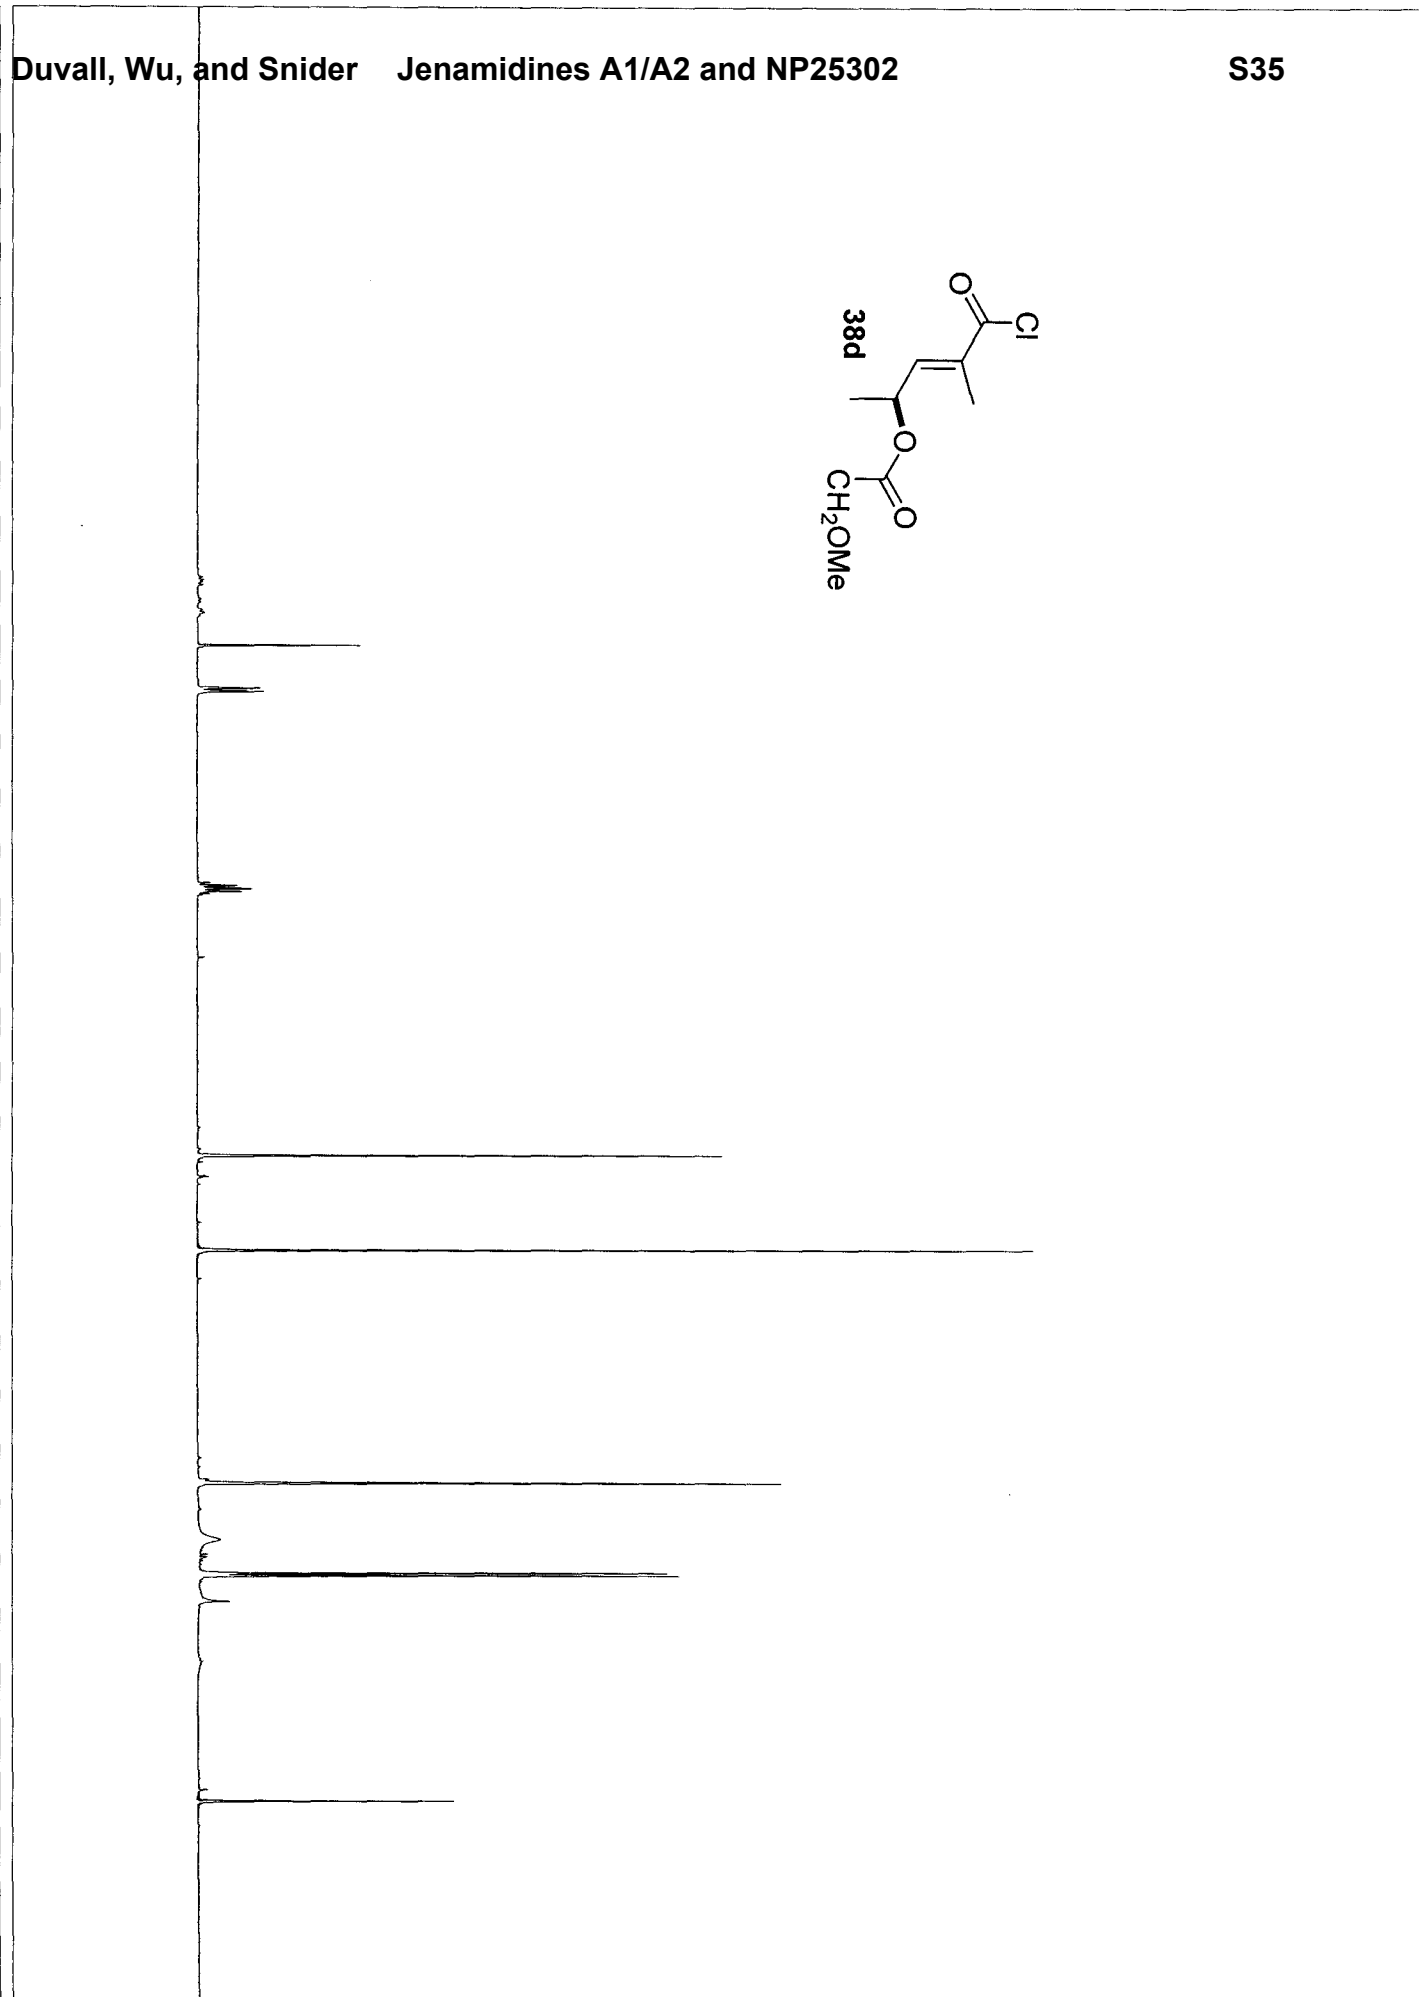

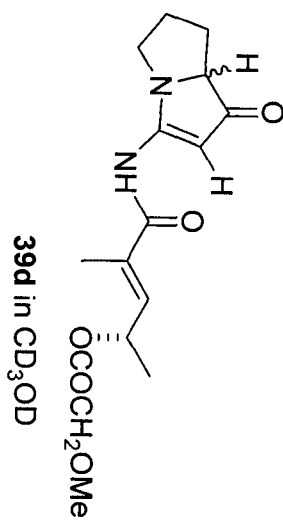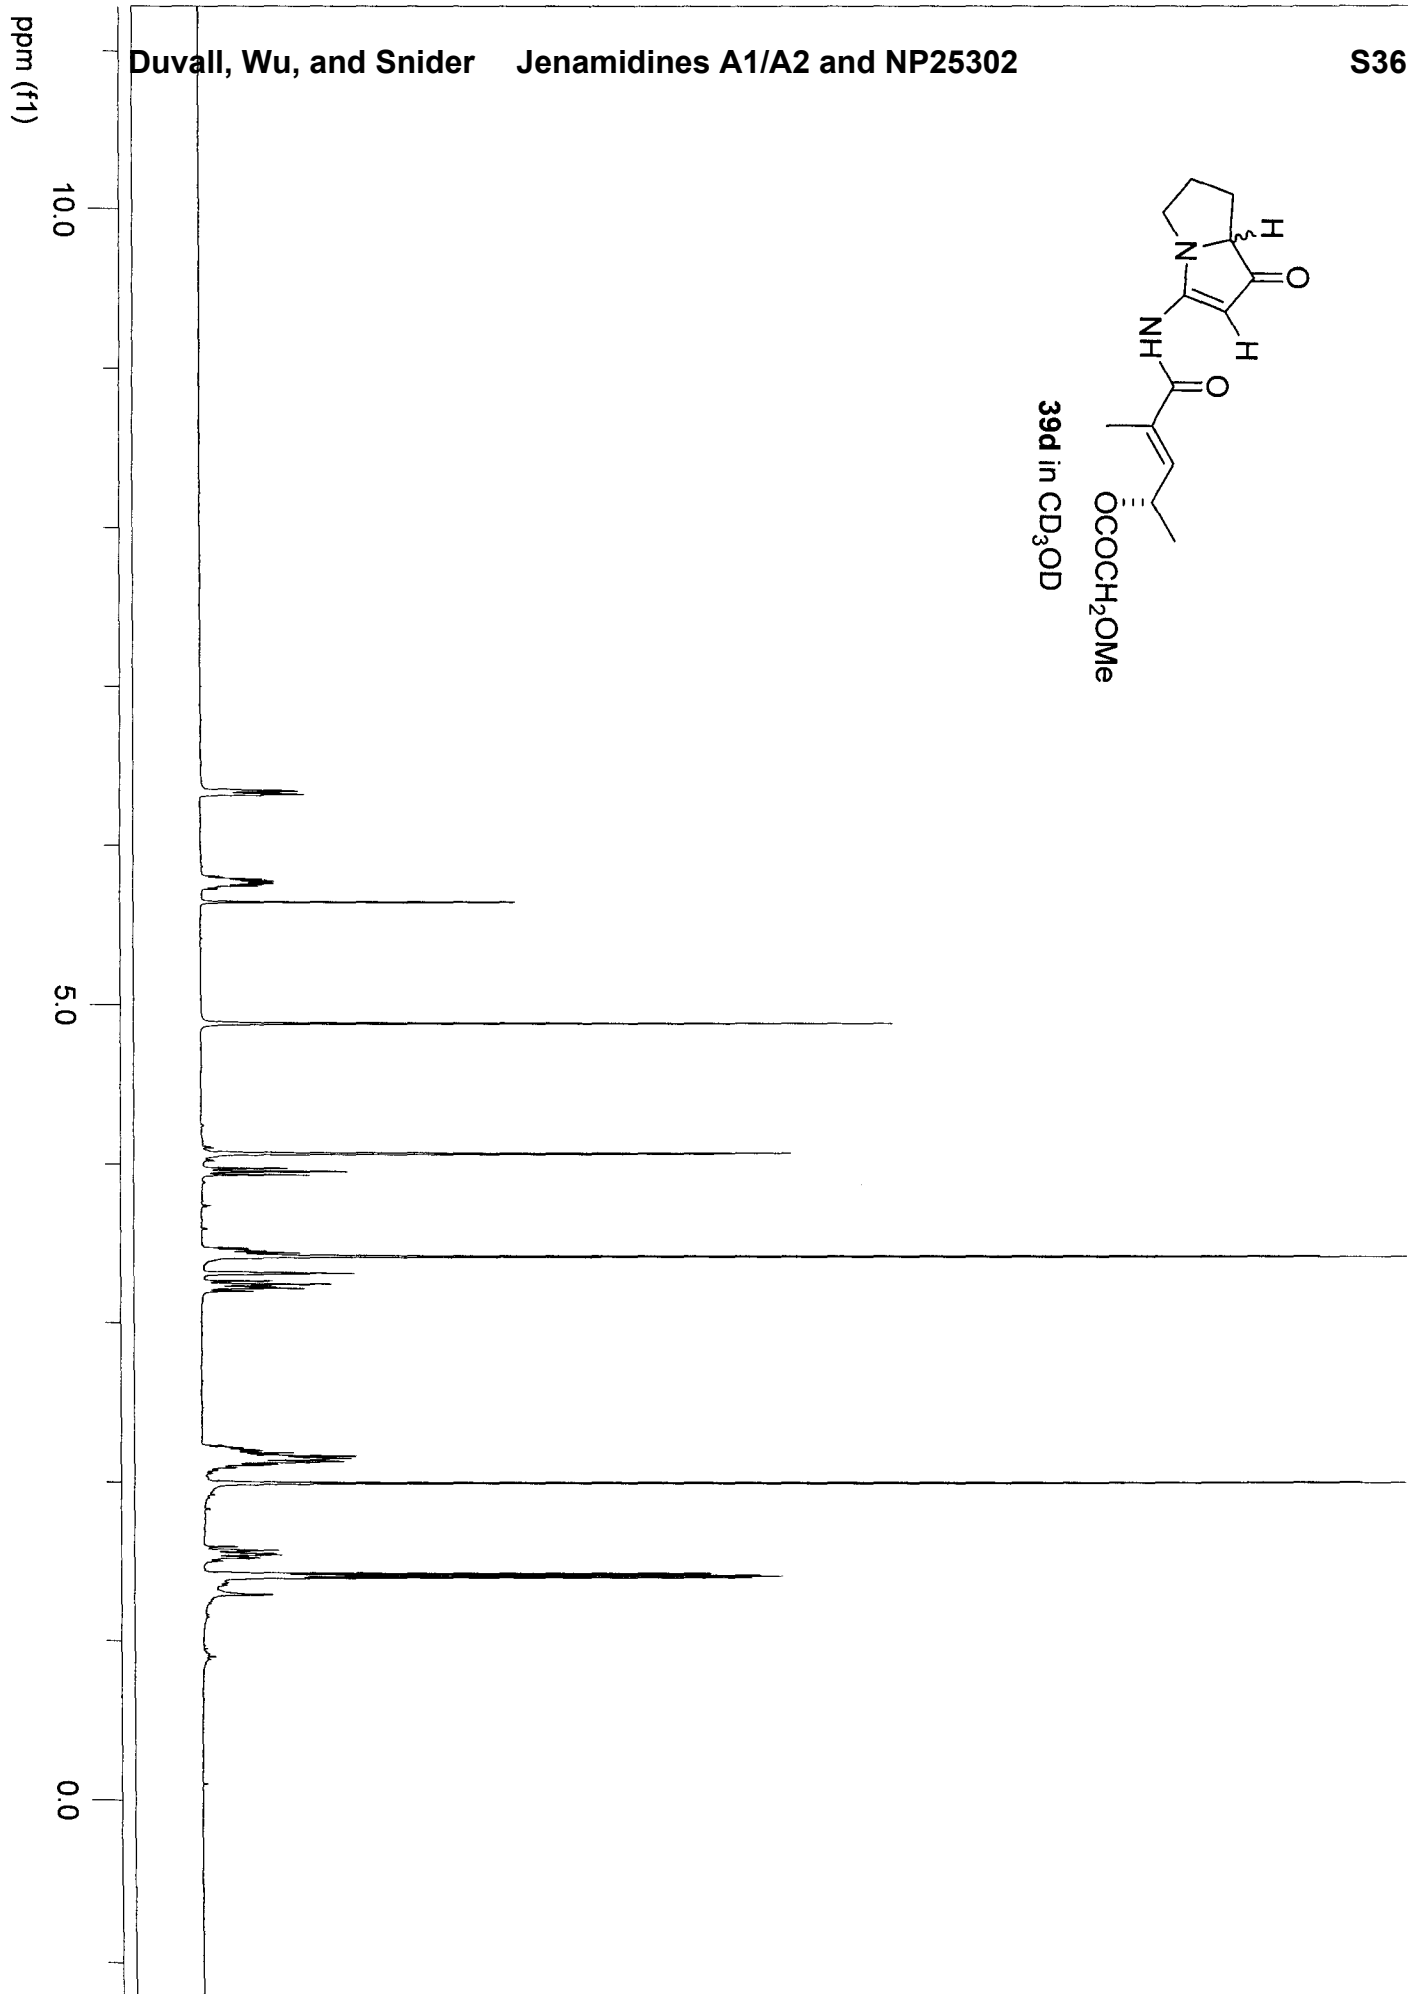

ppm (f1)

200  
150  
100  
50  
0

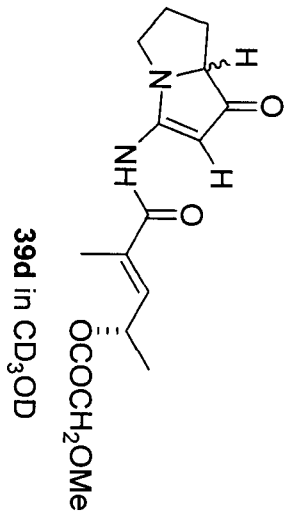

- 204.647
- 173.354
- 171.375
- 171.359
- 169.371
- 169.317
- 138.039
- 137.994
- 134.199
- 134.175
- 93.896
- 70.742
- 70.472
- 69.418
- 69.316
- 59.526
- 49.640
- 49.428
- 49.285
- 49.213
- 49.000
- 48.788
- 48.575
- 48.361
- 28.792
- 27.474
- 19.775
- 13.292
- 13.264

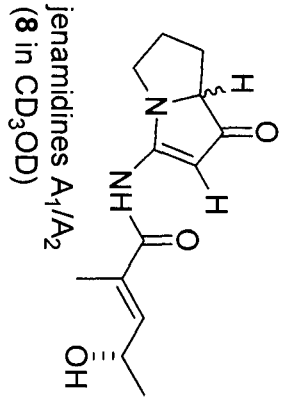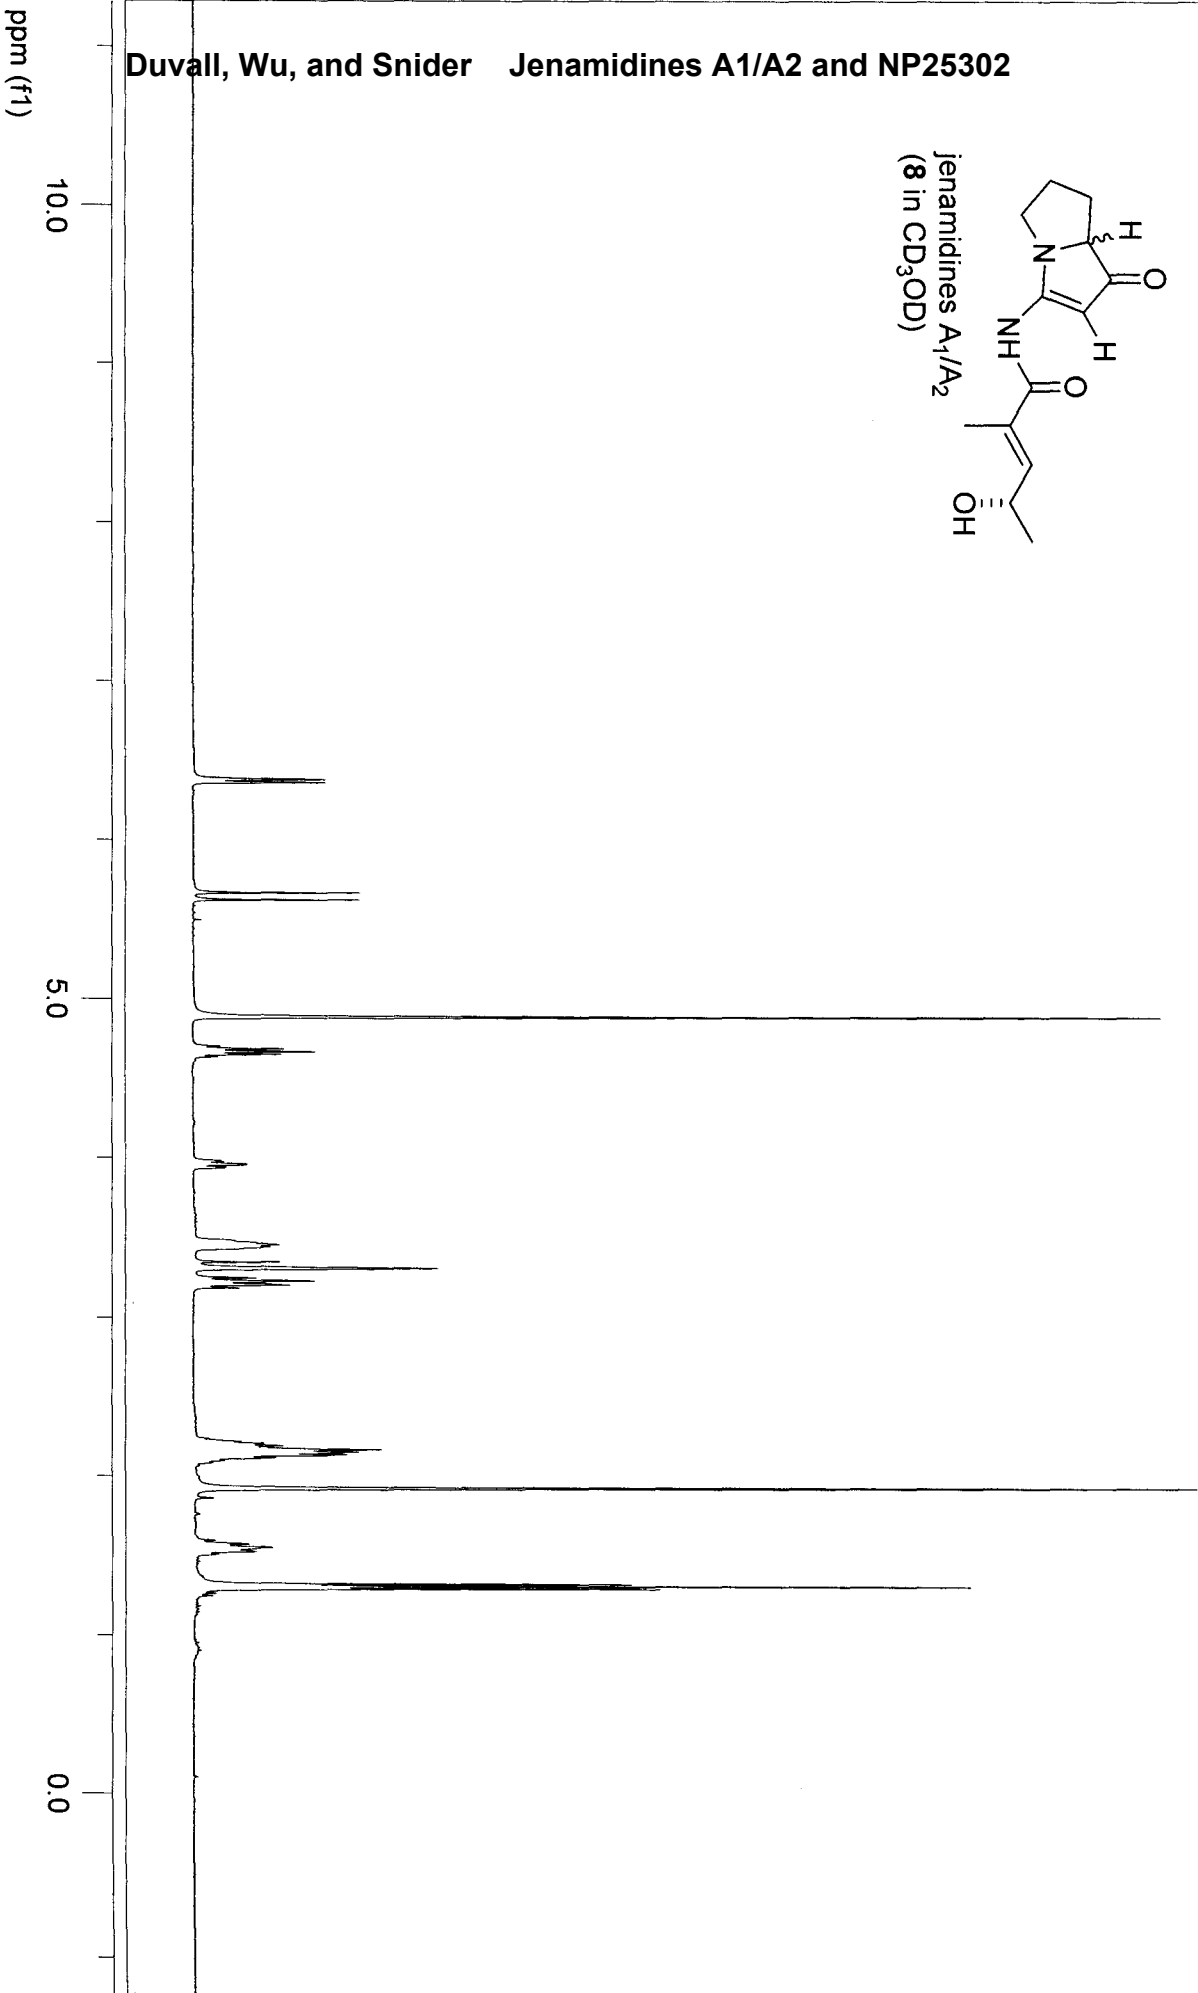

ppm (f1)

200  
150  
100  
50  
0

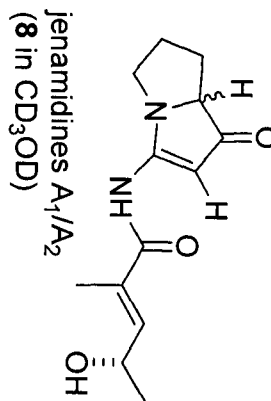

- 204.673
- 173.513
- 169.832
- 169.811
- 143.665
- 143.640
- 131.610
- 93.800
- 93.761
- 70.772
- 70.659
- 65.305
- 65.253
- 49.639
- 49.425
- 49.200
- 49.212
- 49.000
- 48.786
- 48.573
- 48.360
- 28.803
- 27.515
- 27.479
- 27.411
- 27.375
- 22.683
- 22.644
- 12.927

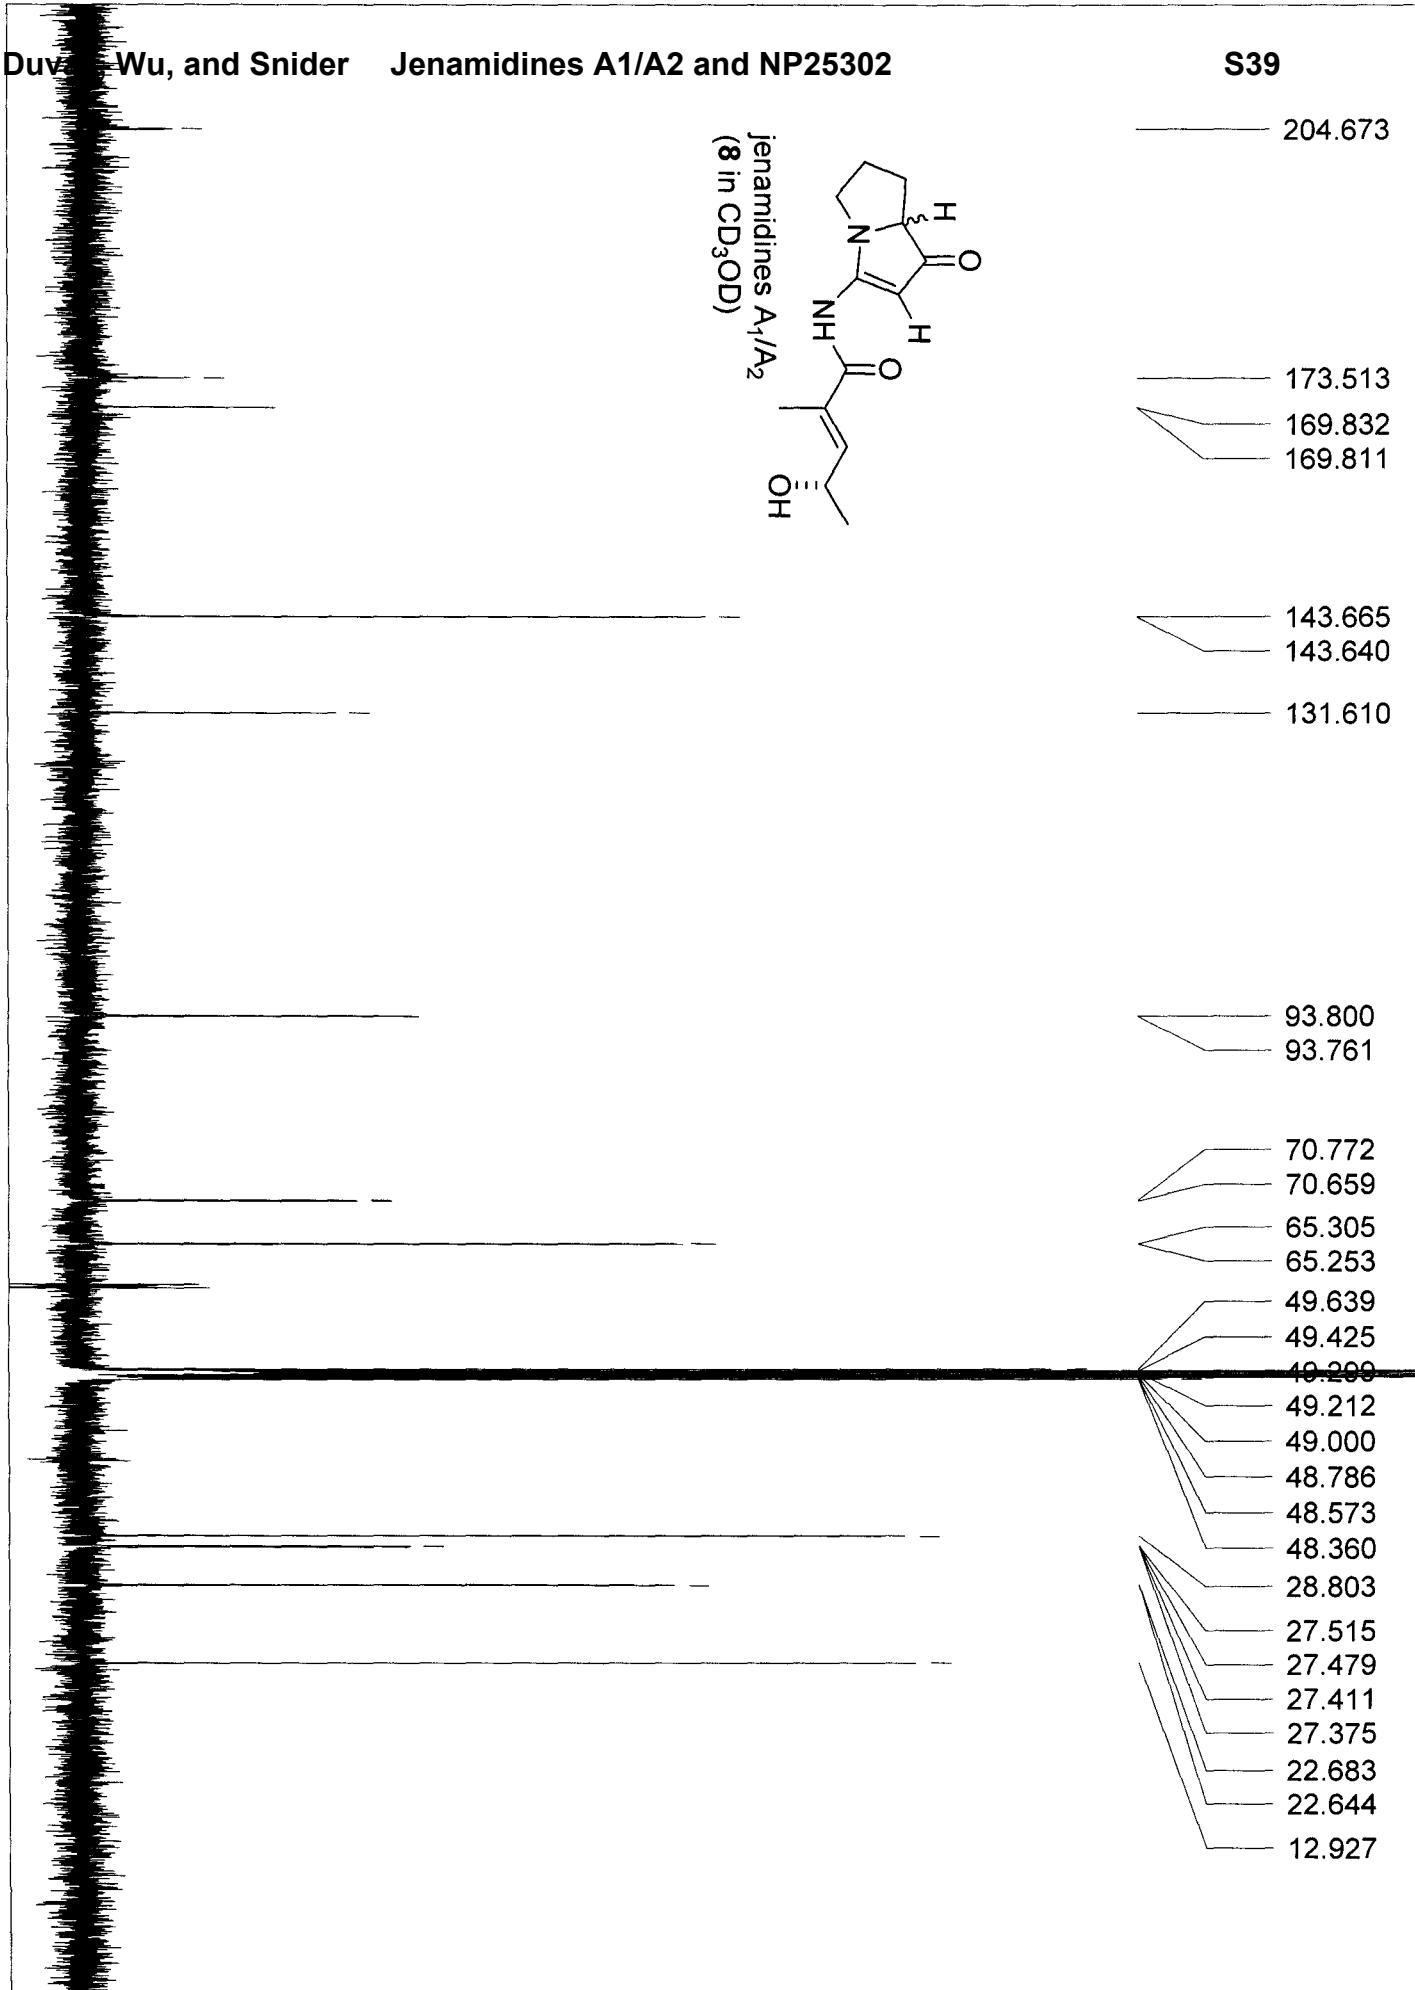

ppm (f1)

10.0

5.0

0.0

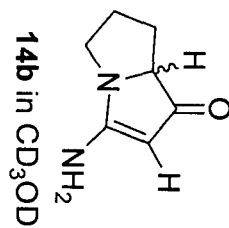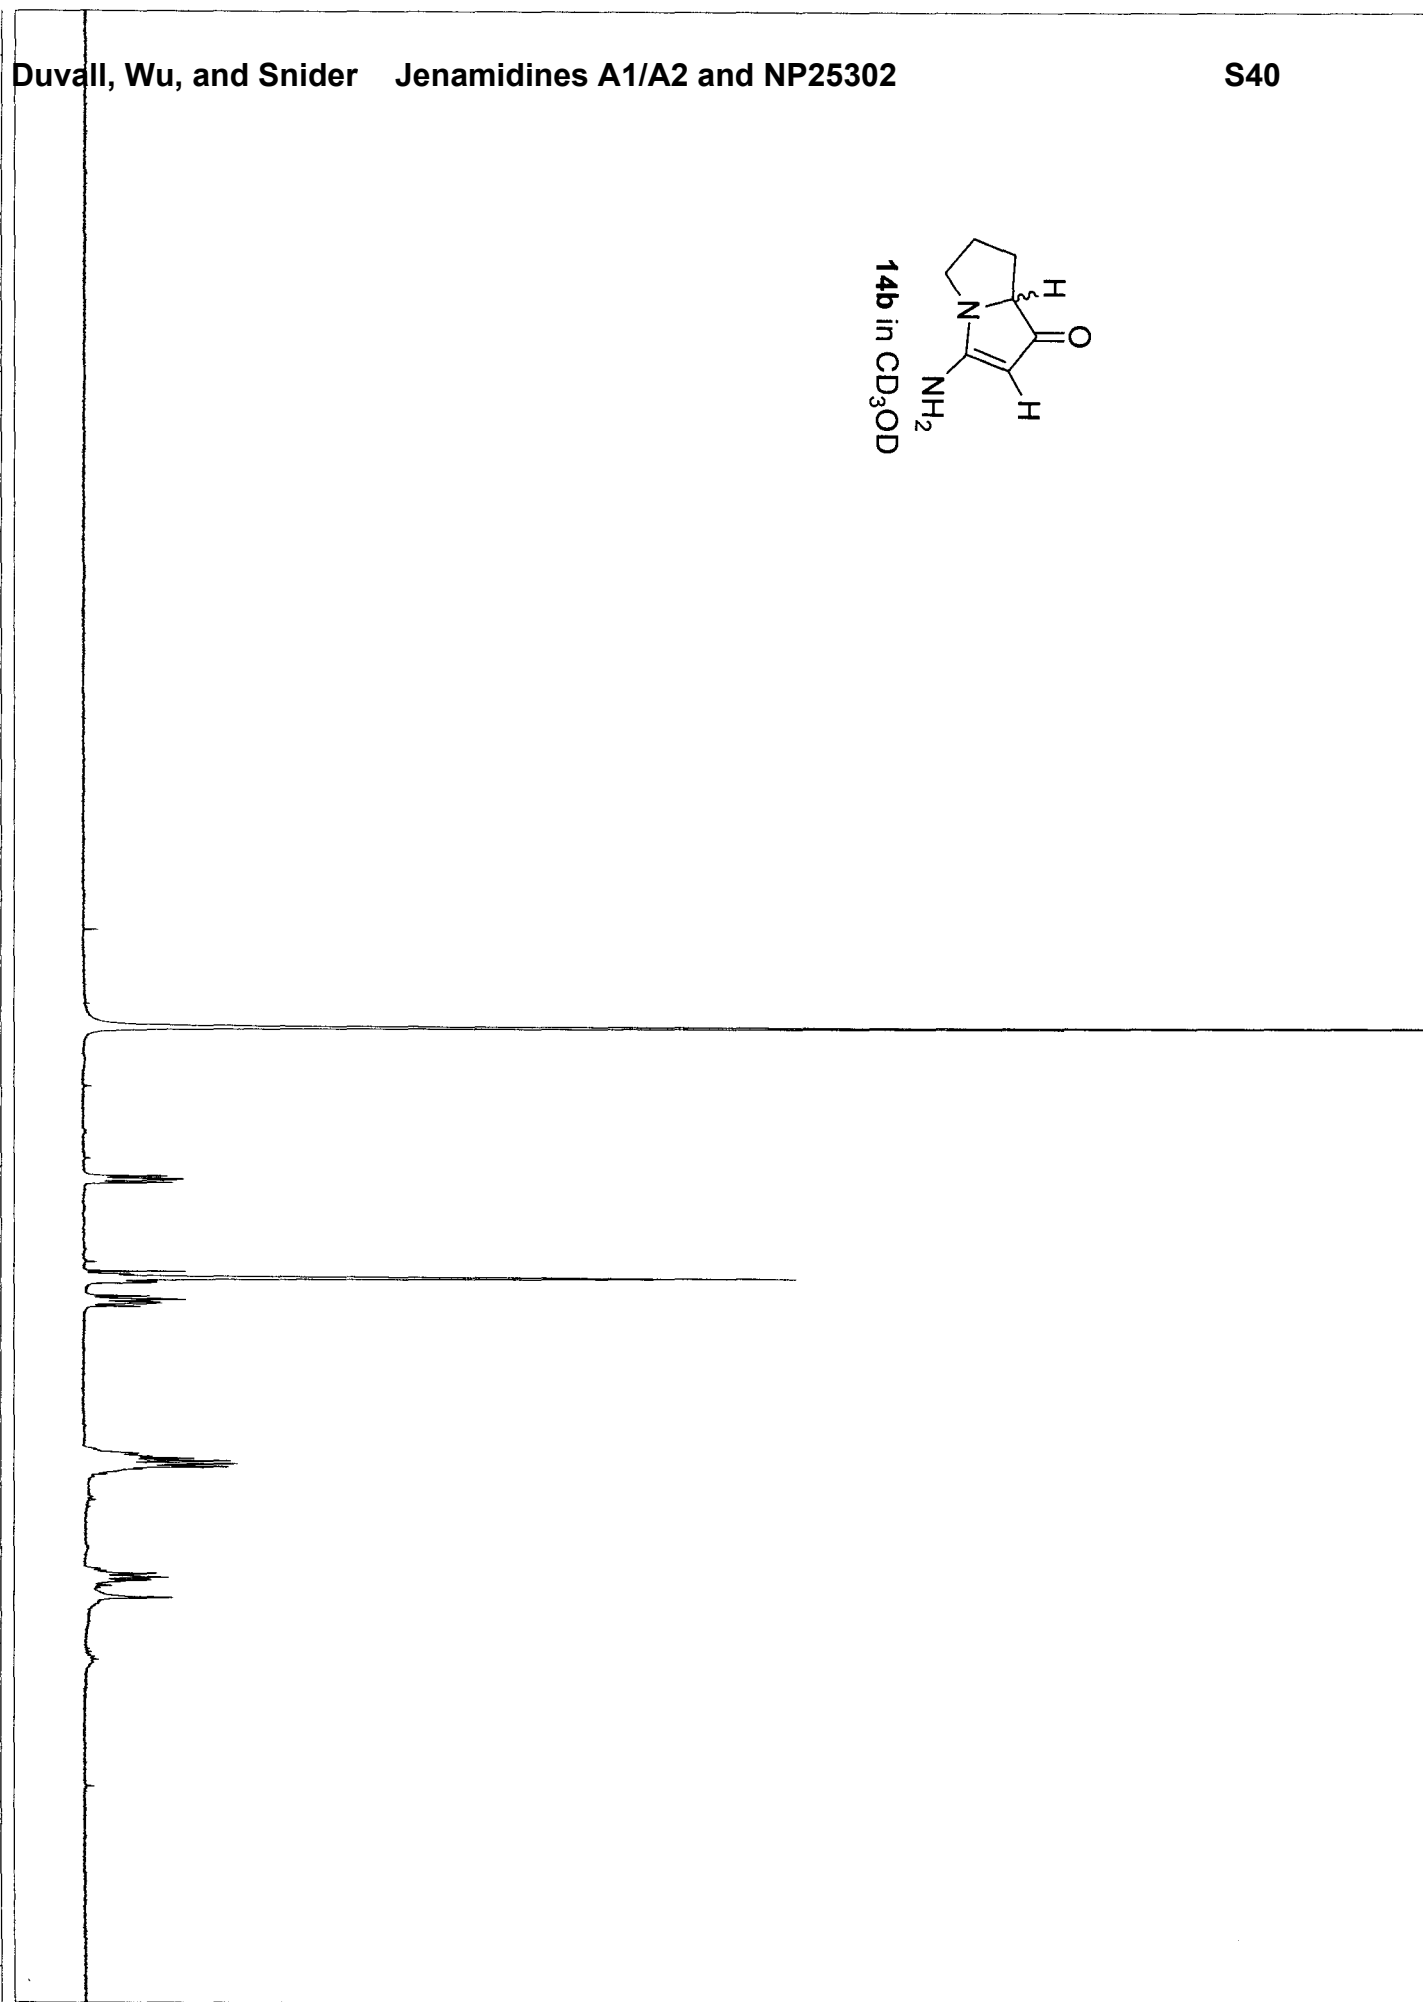



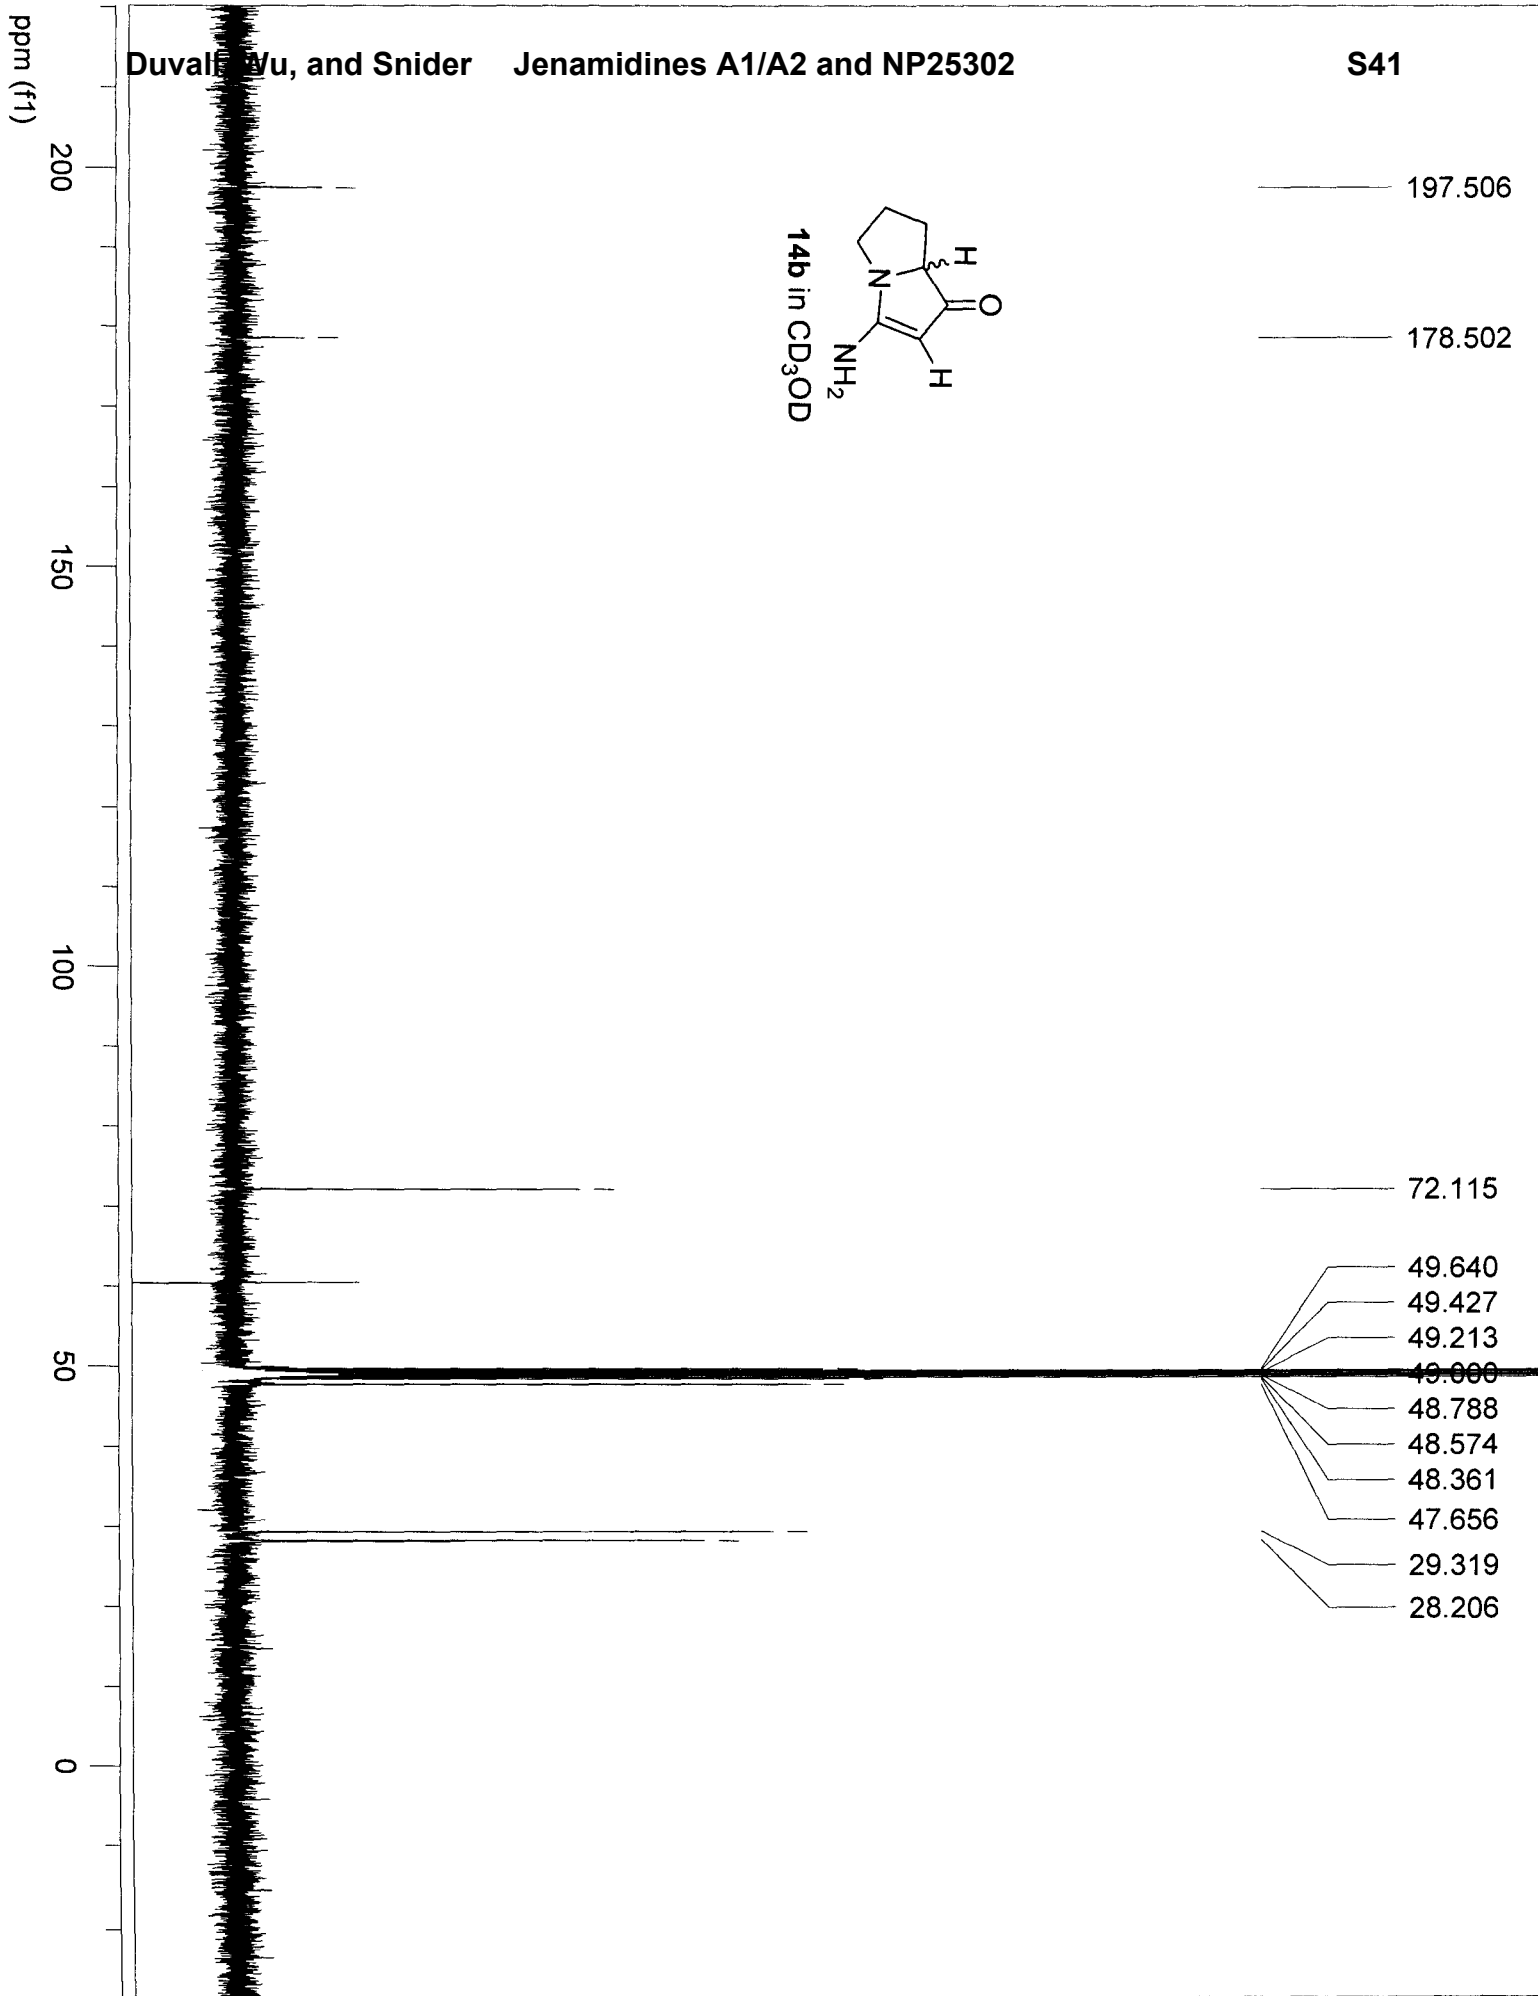

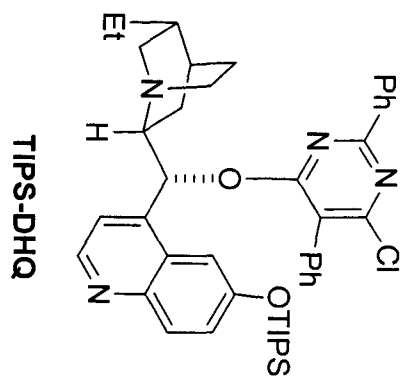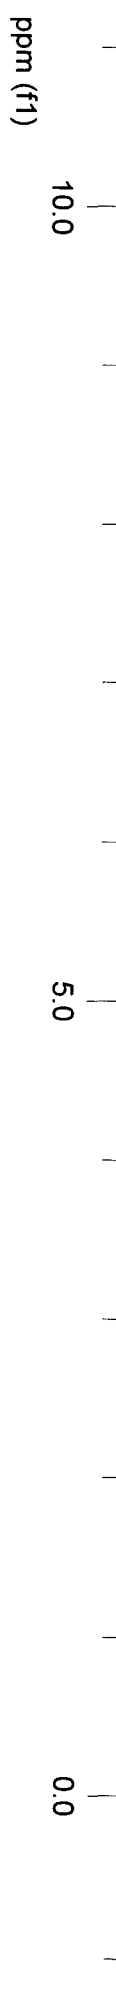

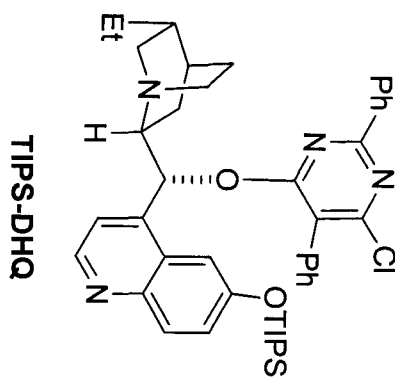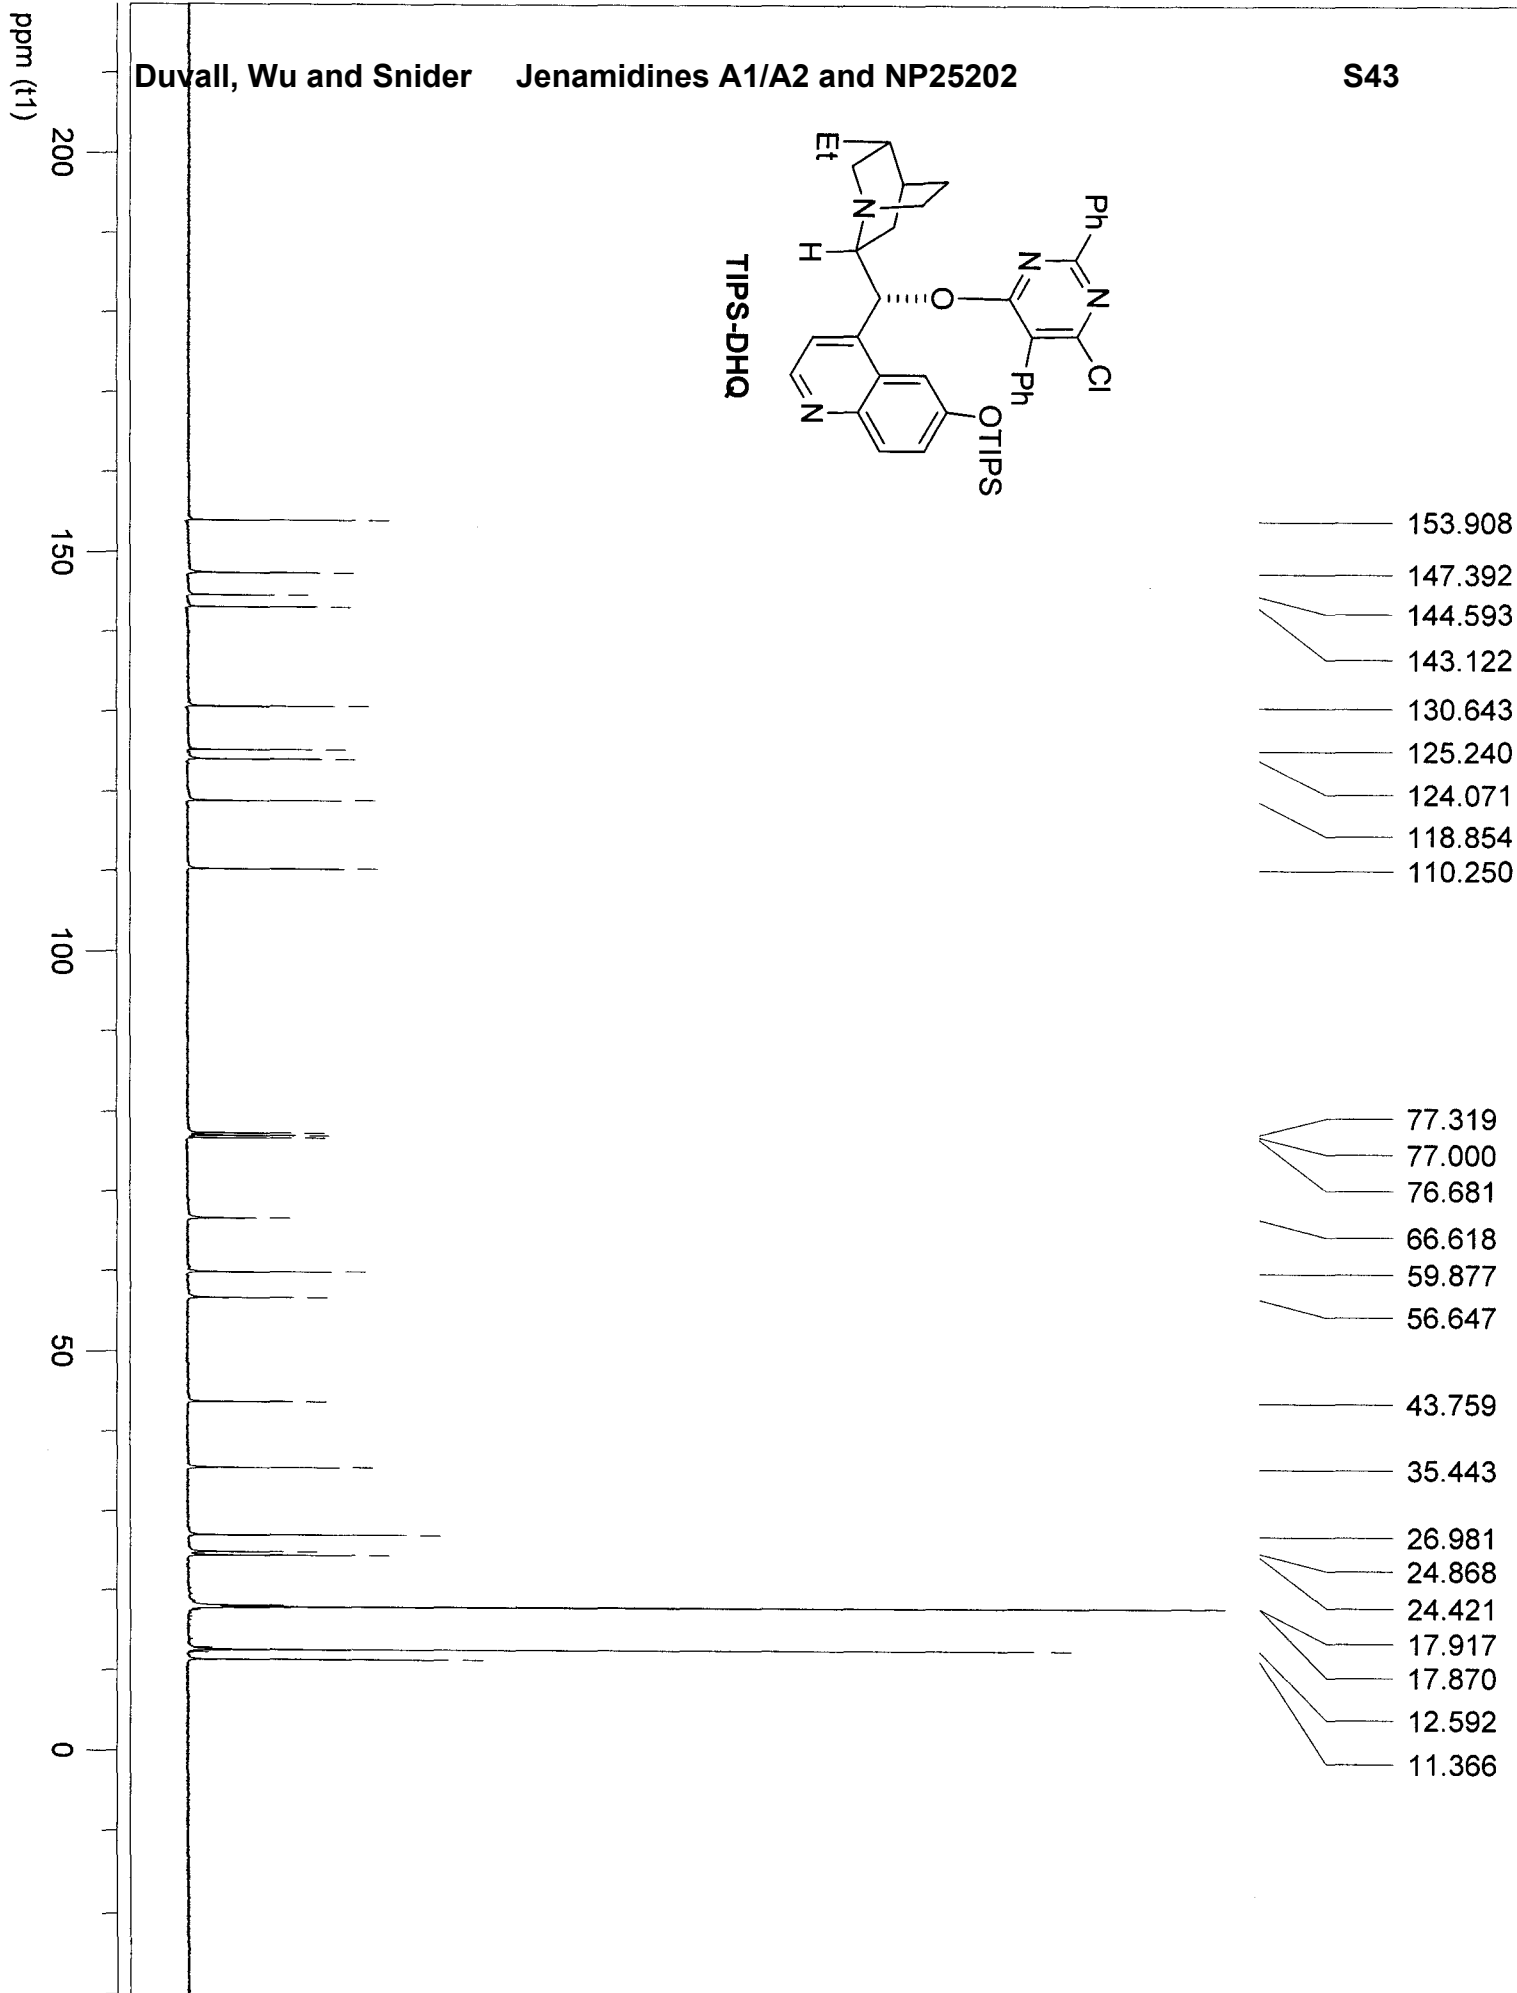

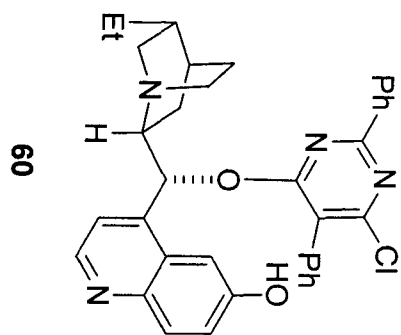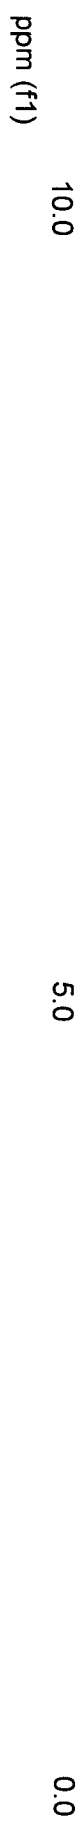

ppm (t1)

200

150

100

50

0

60

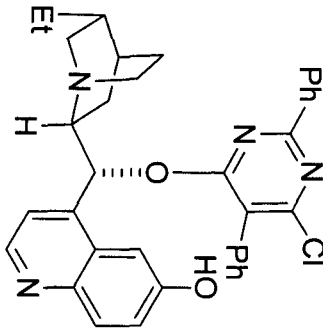

- 165.934
- 162.703
- 159.669
- 157.045
- 146.348
- 143.766
- 143.609
- 135.069
- 132.154
- 131.168
- 130.933
- 129.859
- 128.630
- 128.600
- 128.270
- 128.101
- 127.201
- 123.028
- 118.517
- 117.095
- 107.523
- 77.318
- 77.000
- 76.682
- 76.231
- 58.387
- 58.177
- 43.360
- 36.660
- 27.182
- 26.458
- 24.807
- 20.274
- 11.786

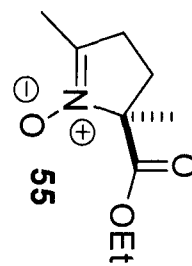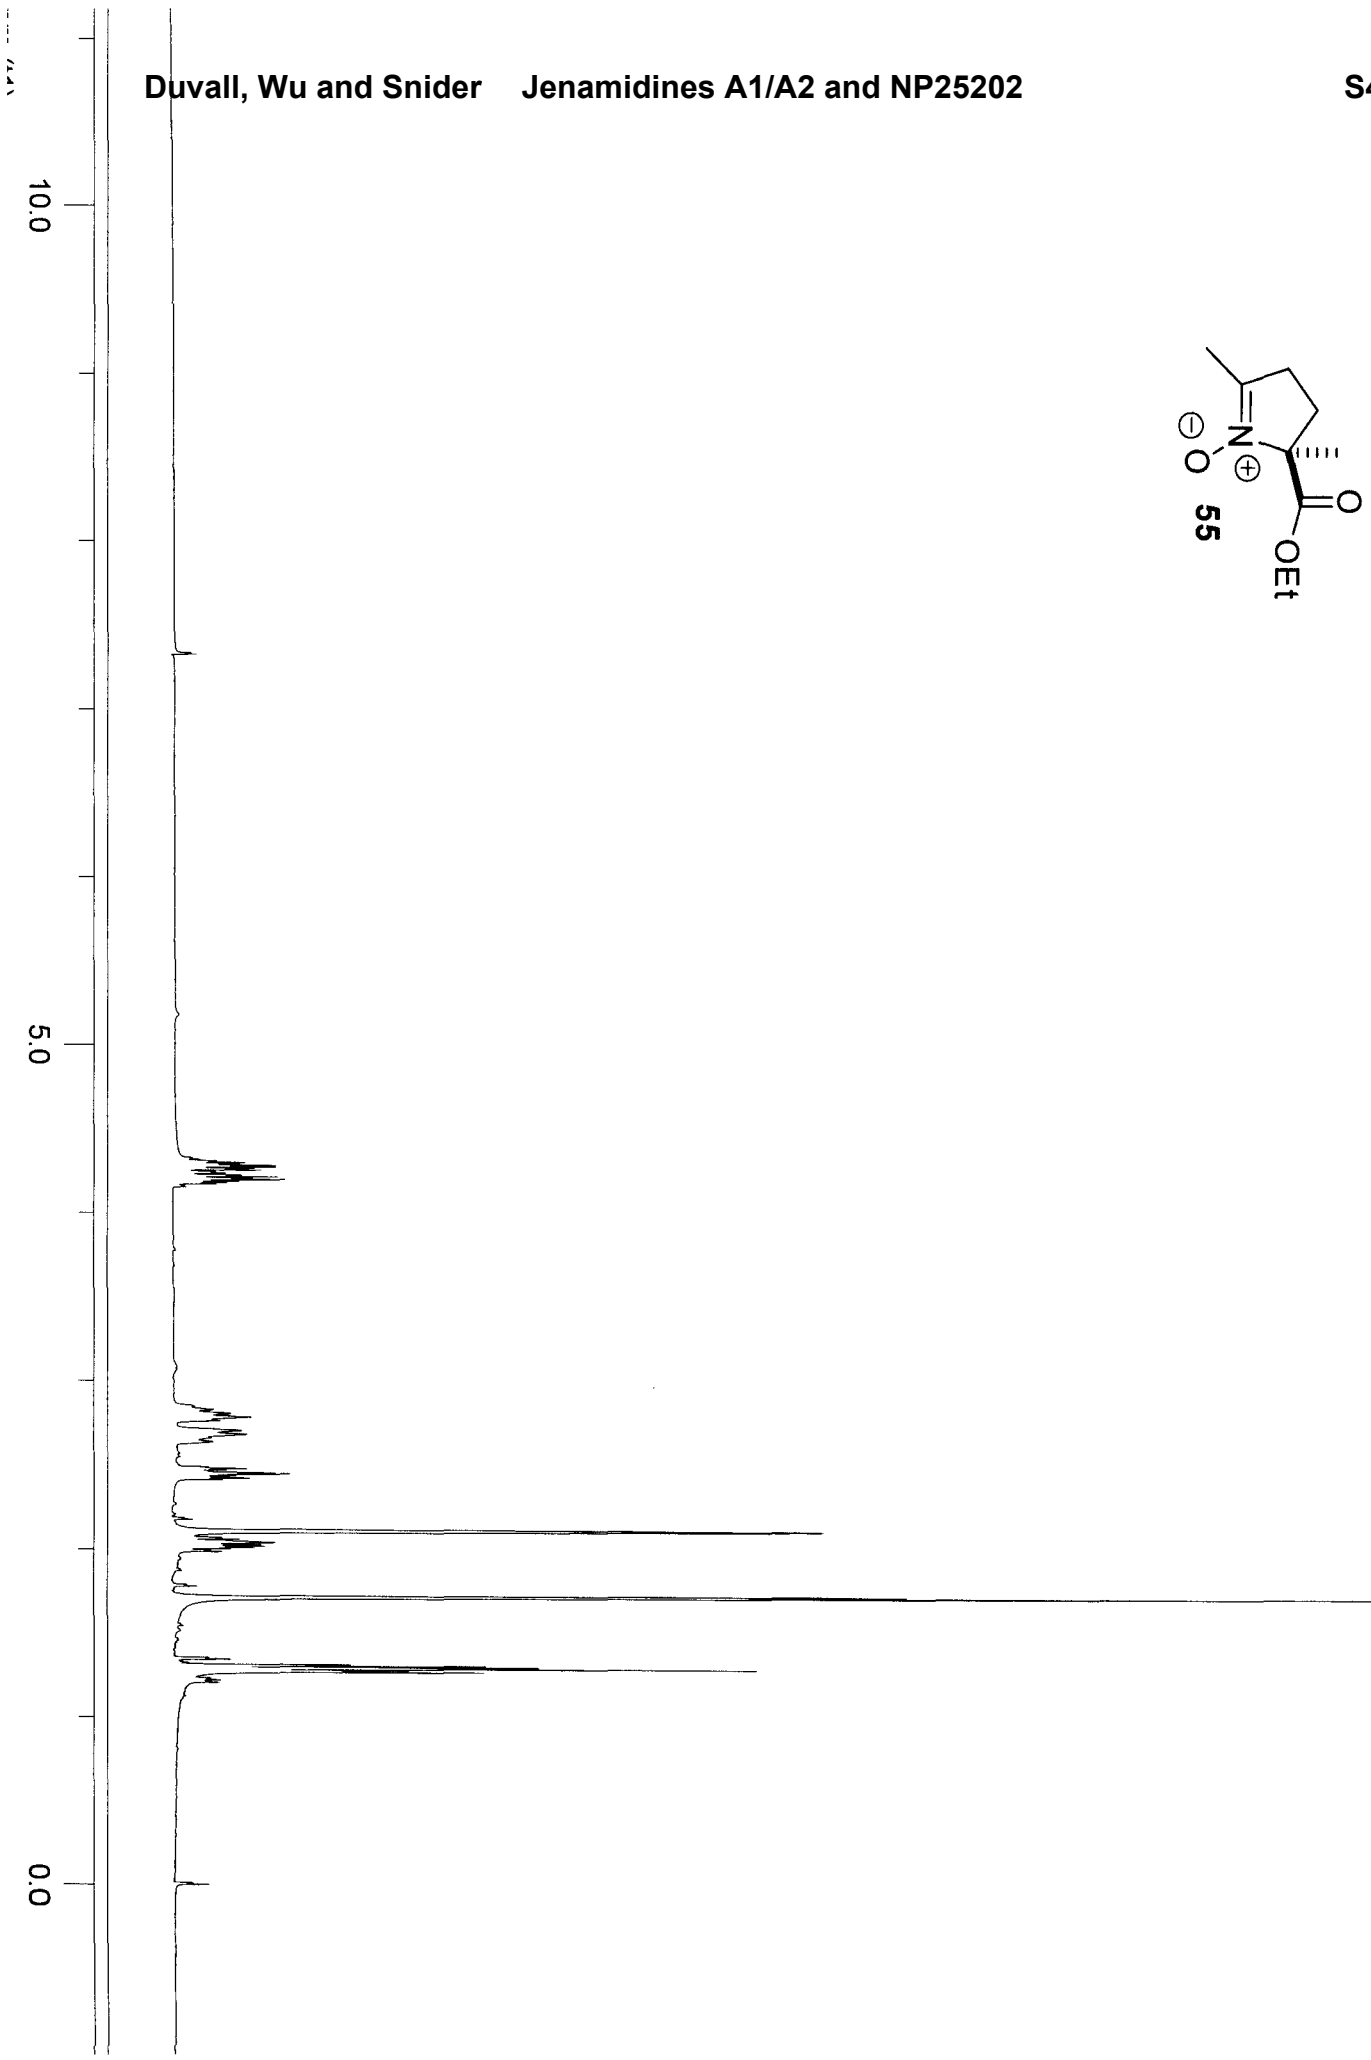

nm (f1)

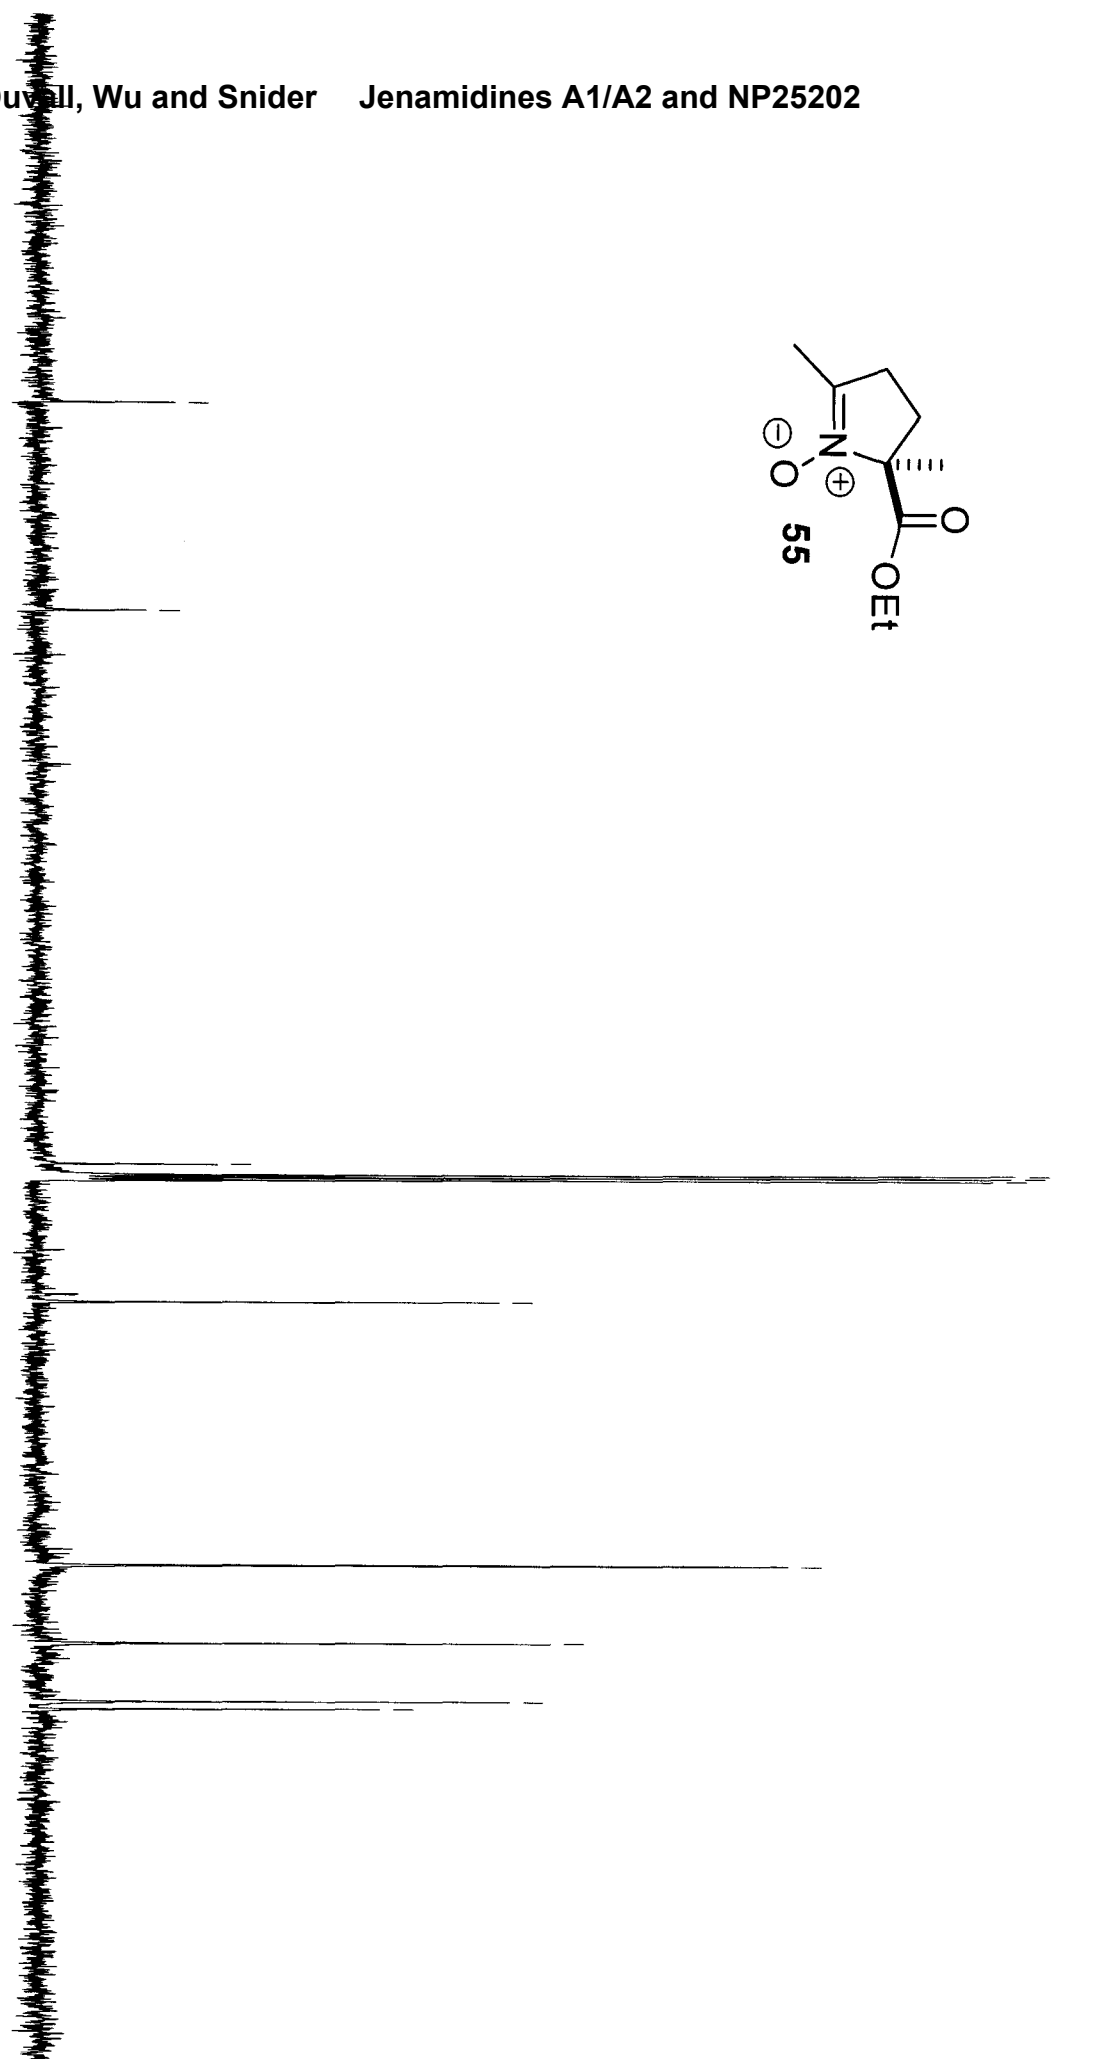

- 170.366
- 145.243
- 78.608
- 77.318
- 77.000
- 76.682
- 61.985
- 30.351
- 30.294
- 20.902
- 13.898
- 13.003

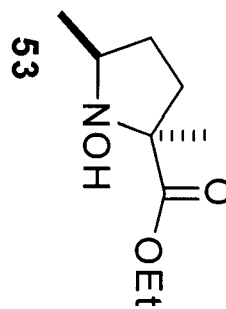

ppm (t1)

10.0

5.0

0.0

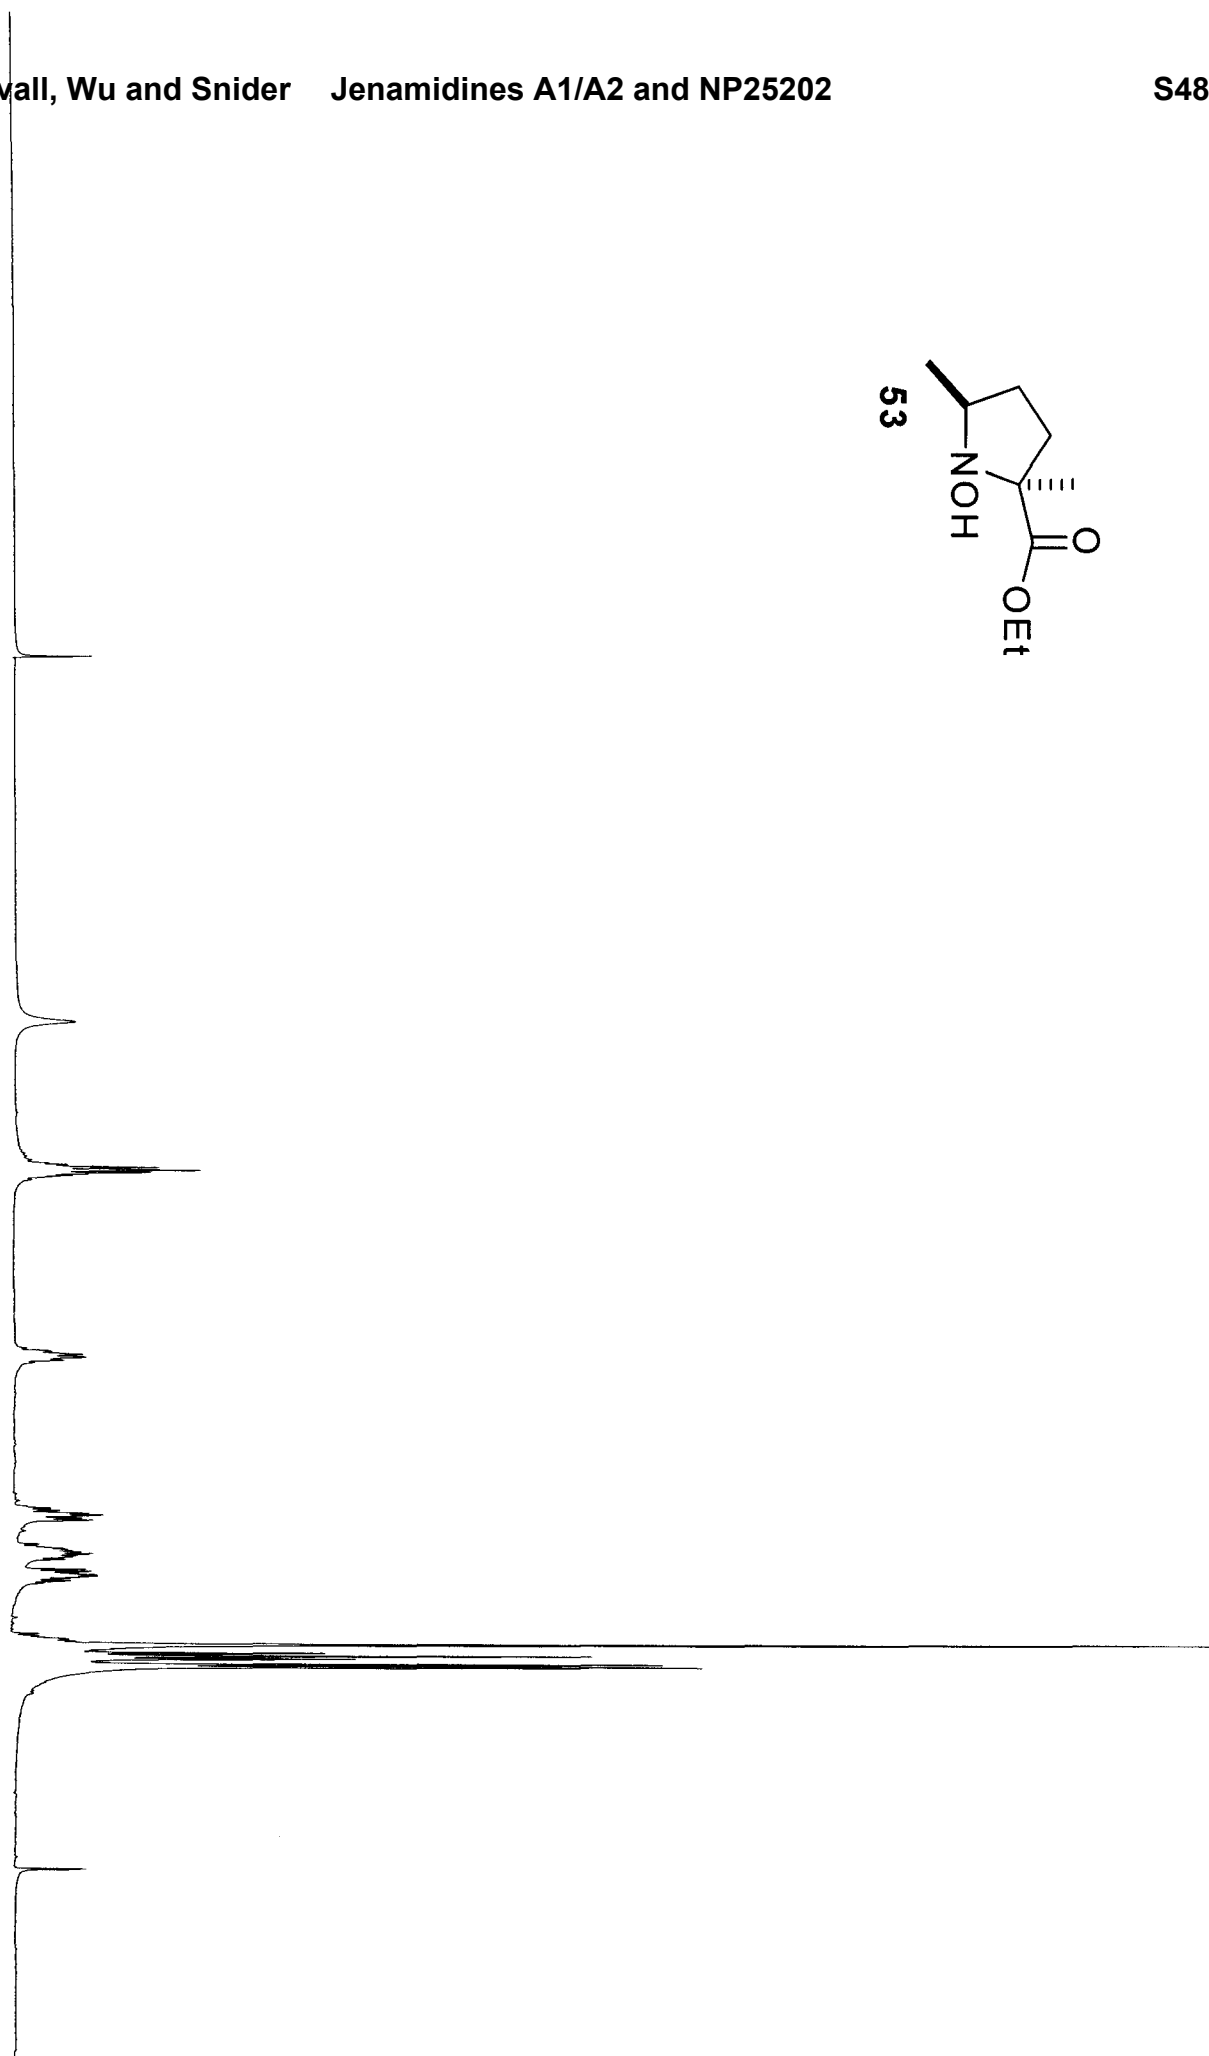



200  
150  
100  
50  
0

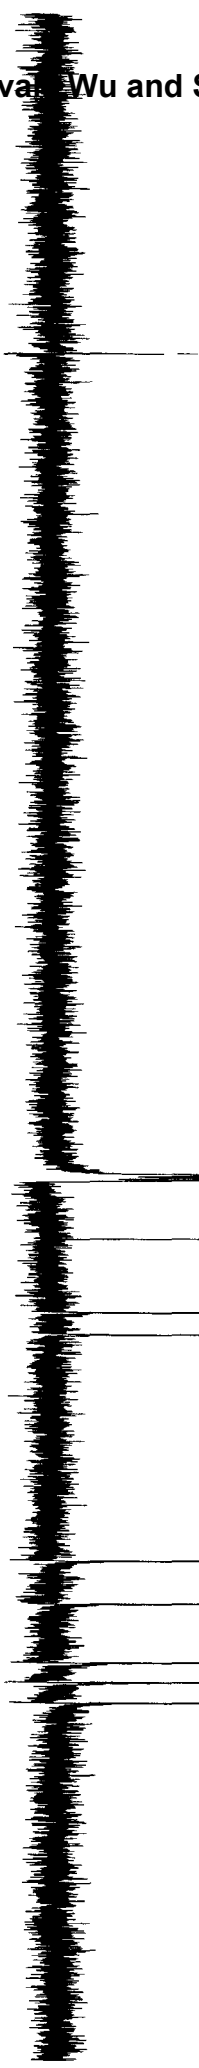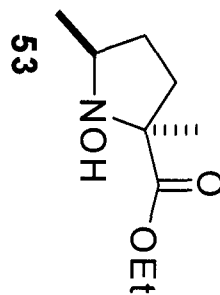

175.522

77.318

77.000

76.682

69.628

60.833

58.185

31.155

25.996

18.953

16.616

14.174

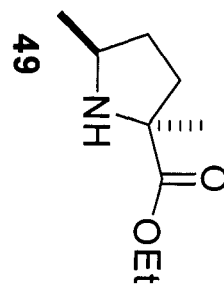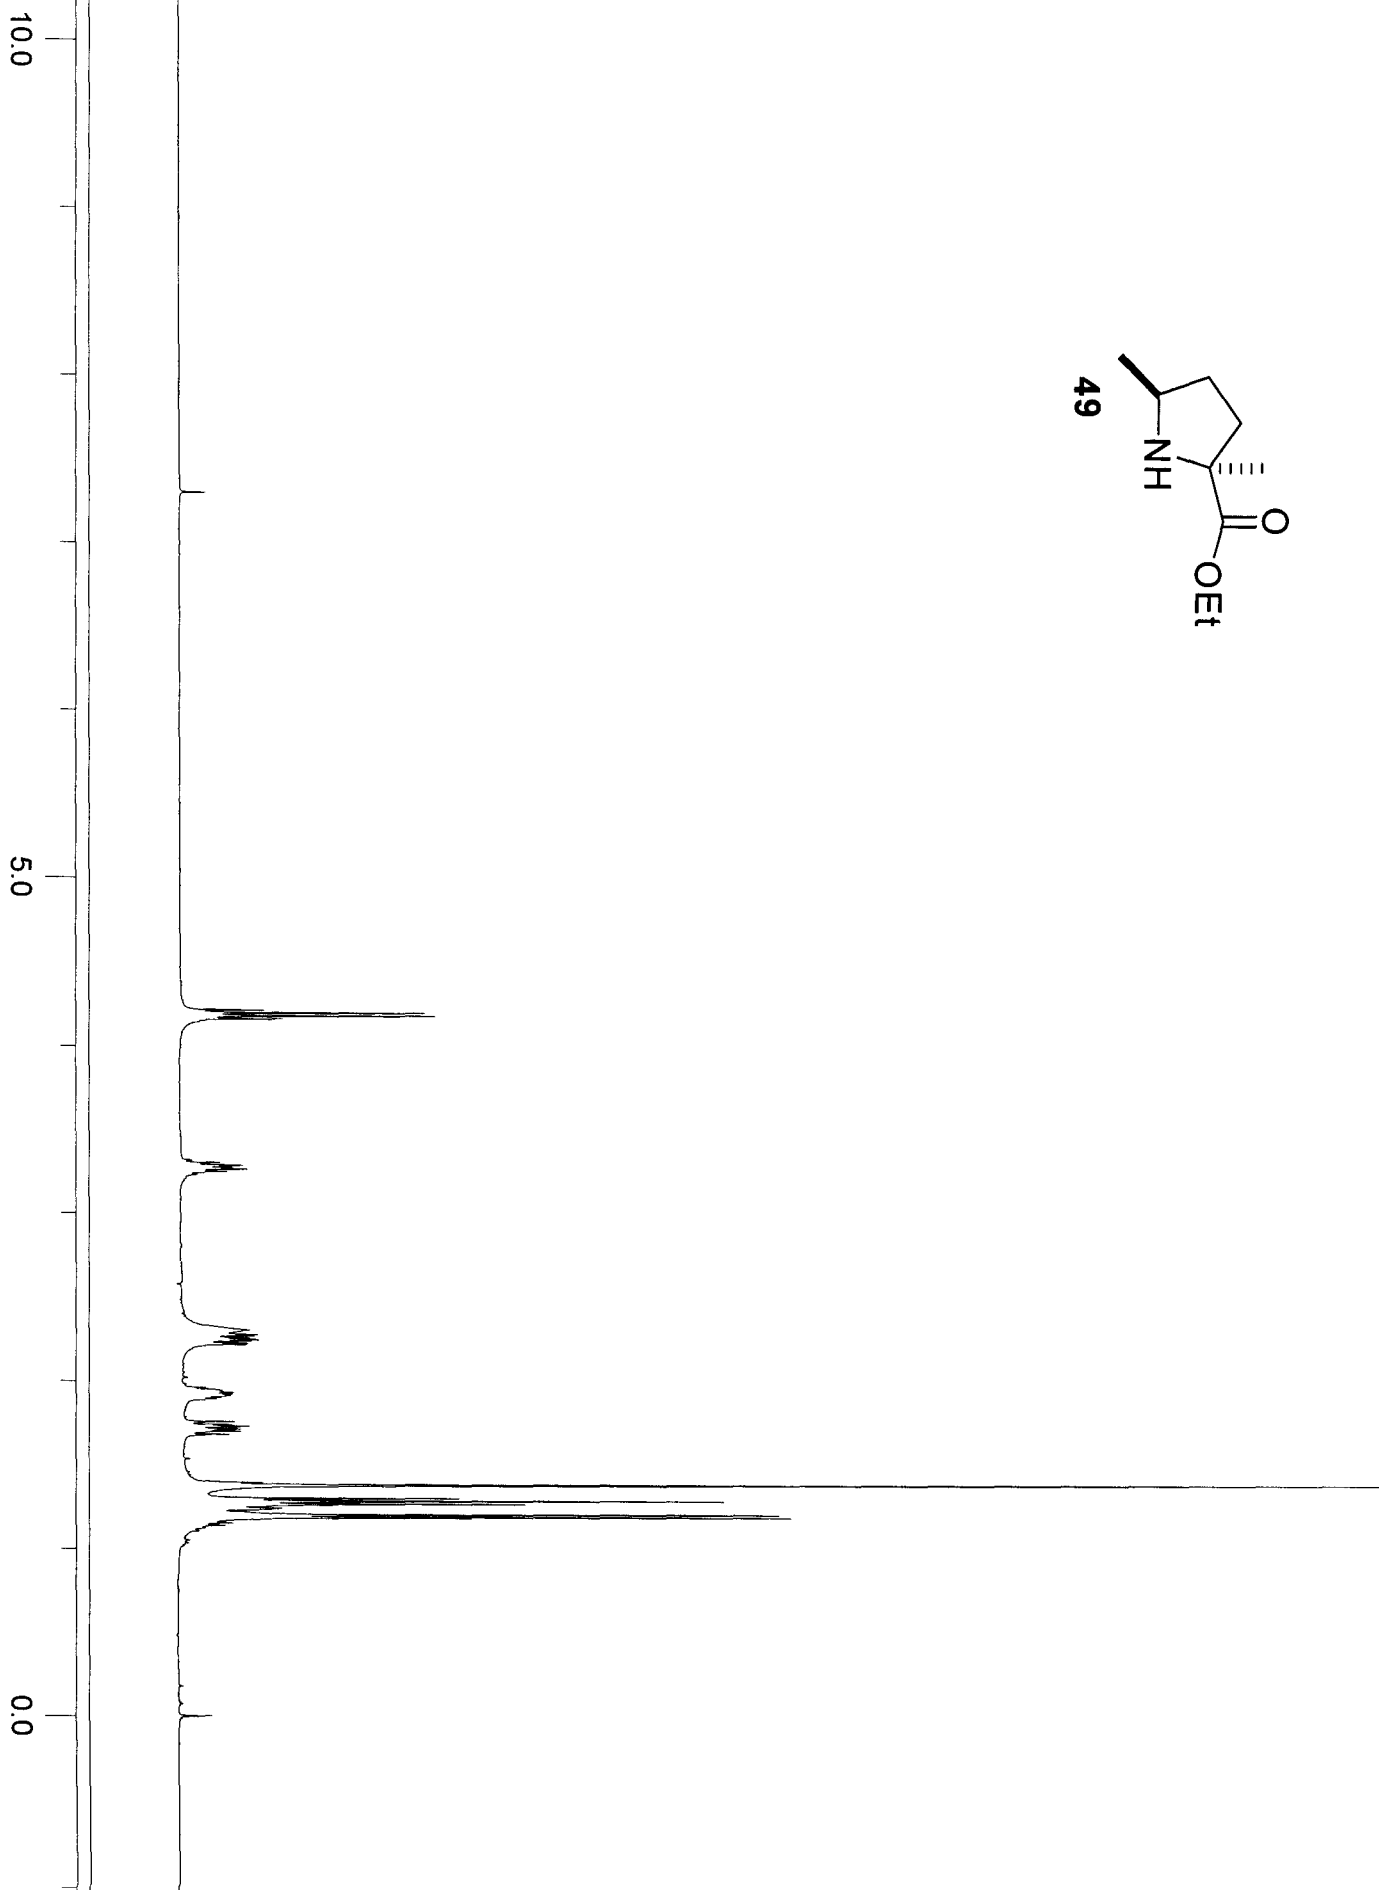

200  
150  
100  
50  
0

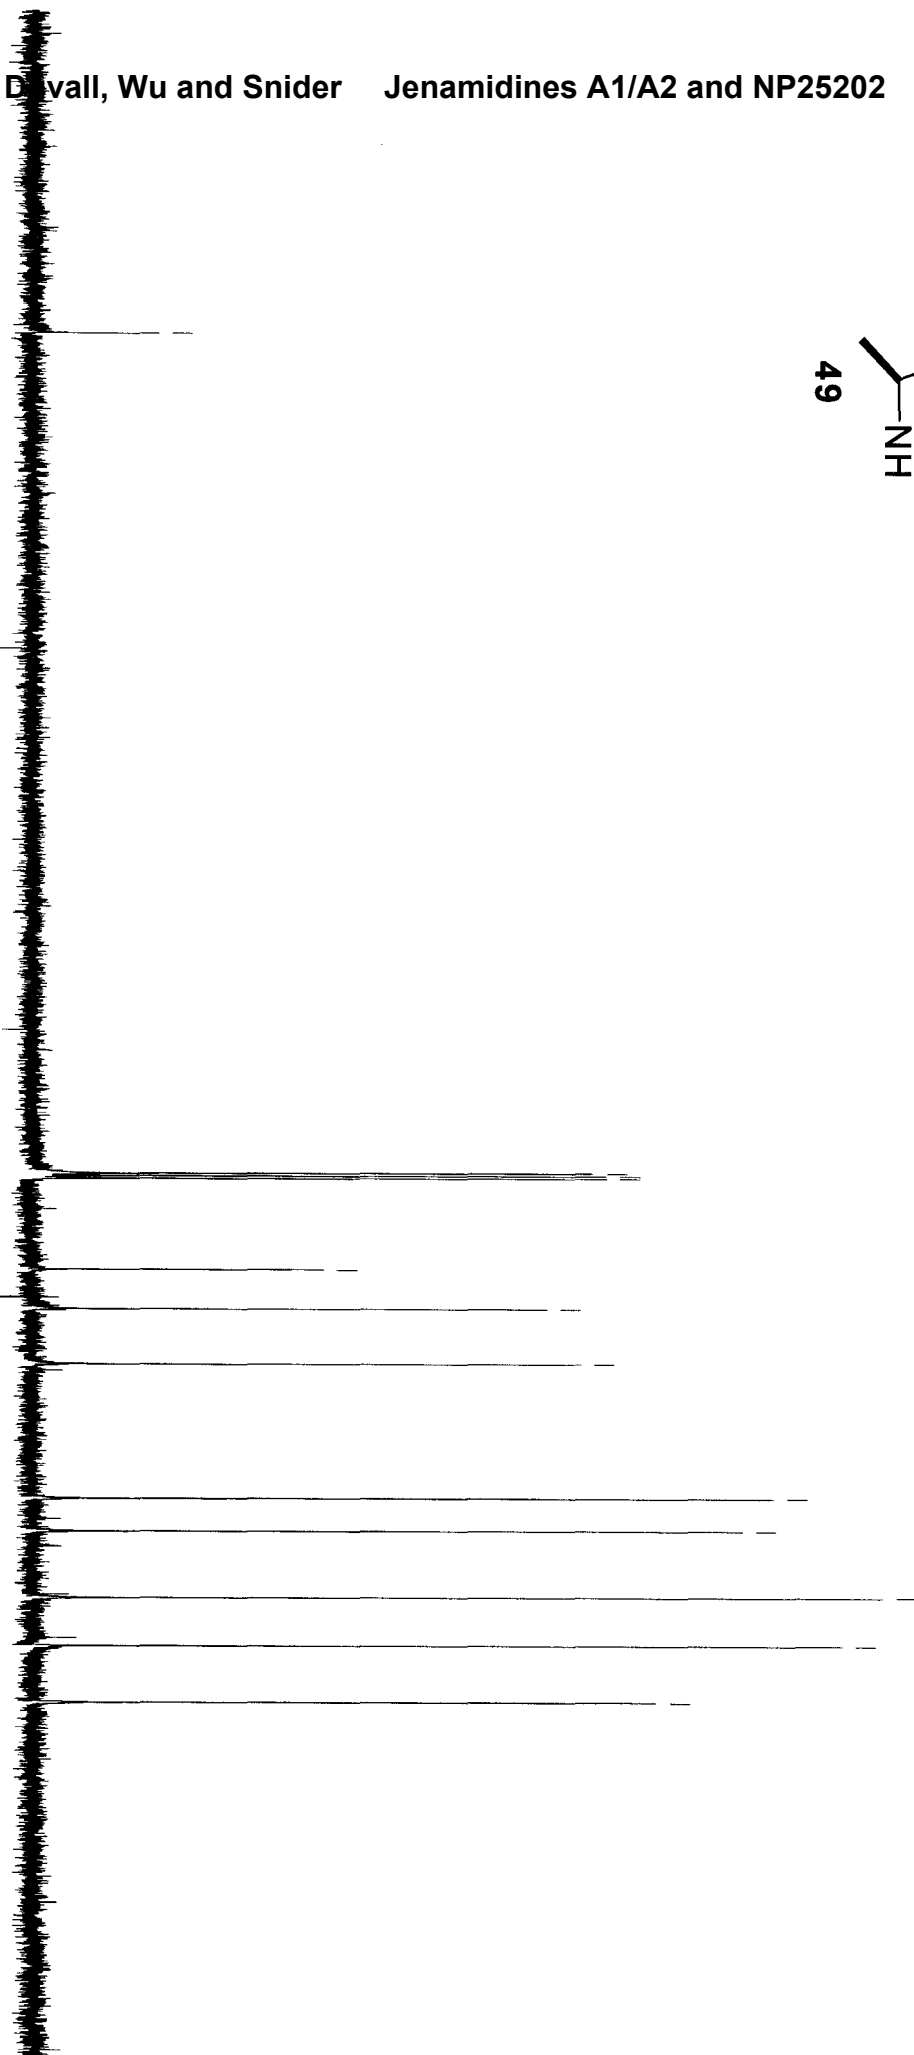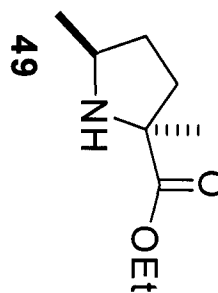

- 177.606
- 77.318
- 77.000
- 76.682
- 65.780
- 61.078
- 54.505
- 38.481
- 34.611
- 26.646
- 20.870
- 14.105

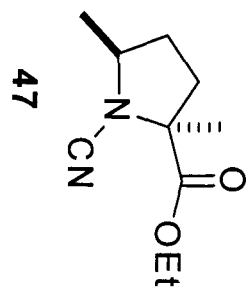

10.0

5.0

0.0

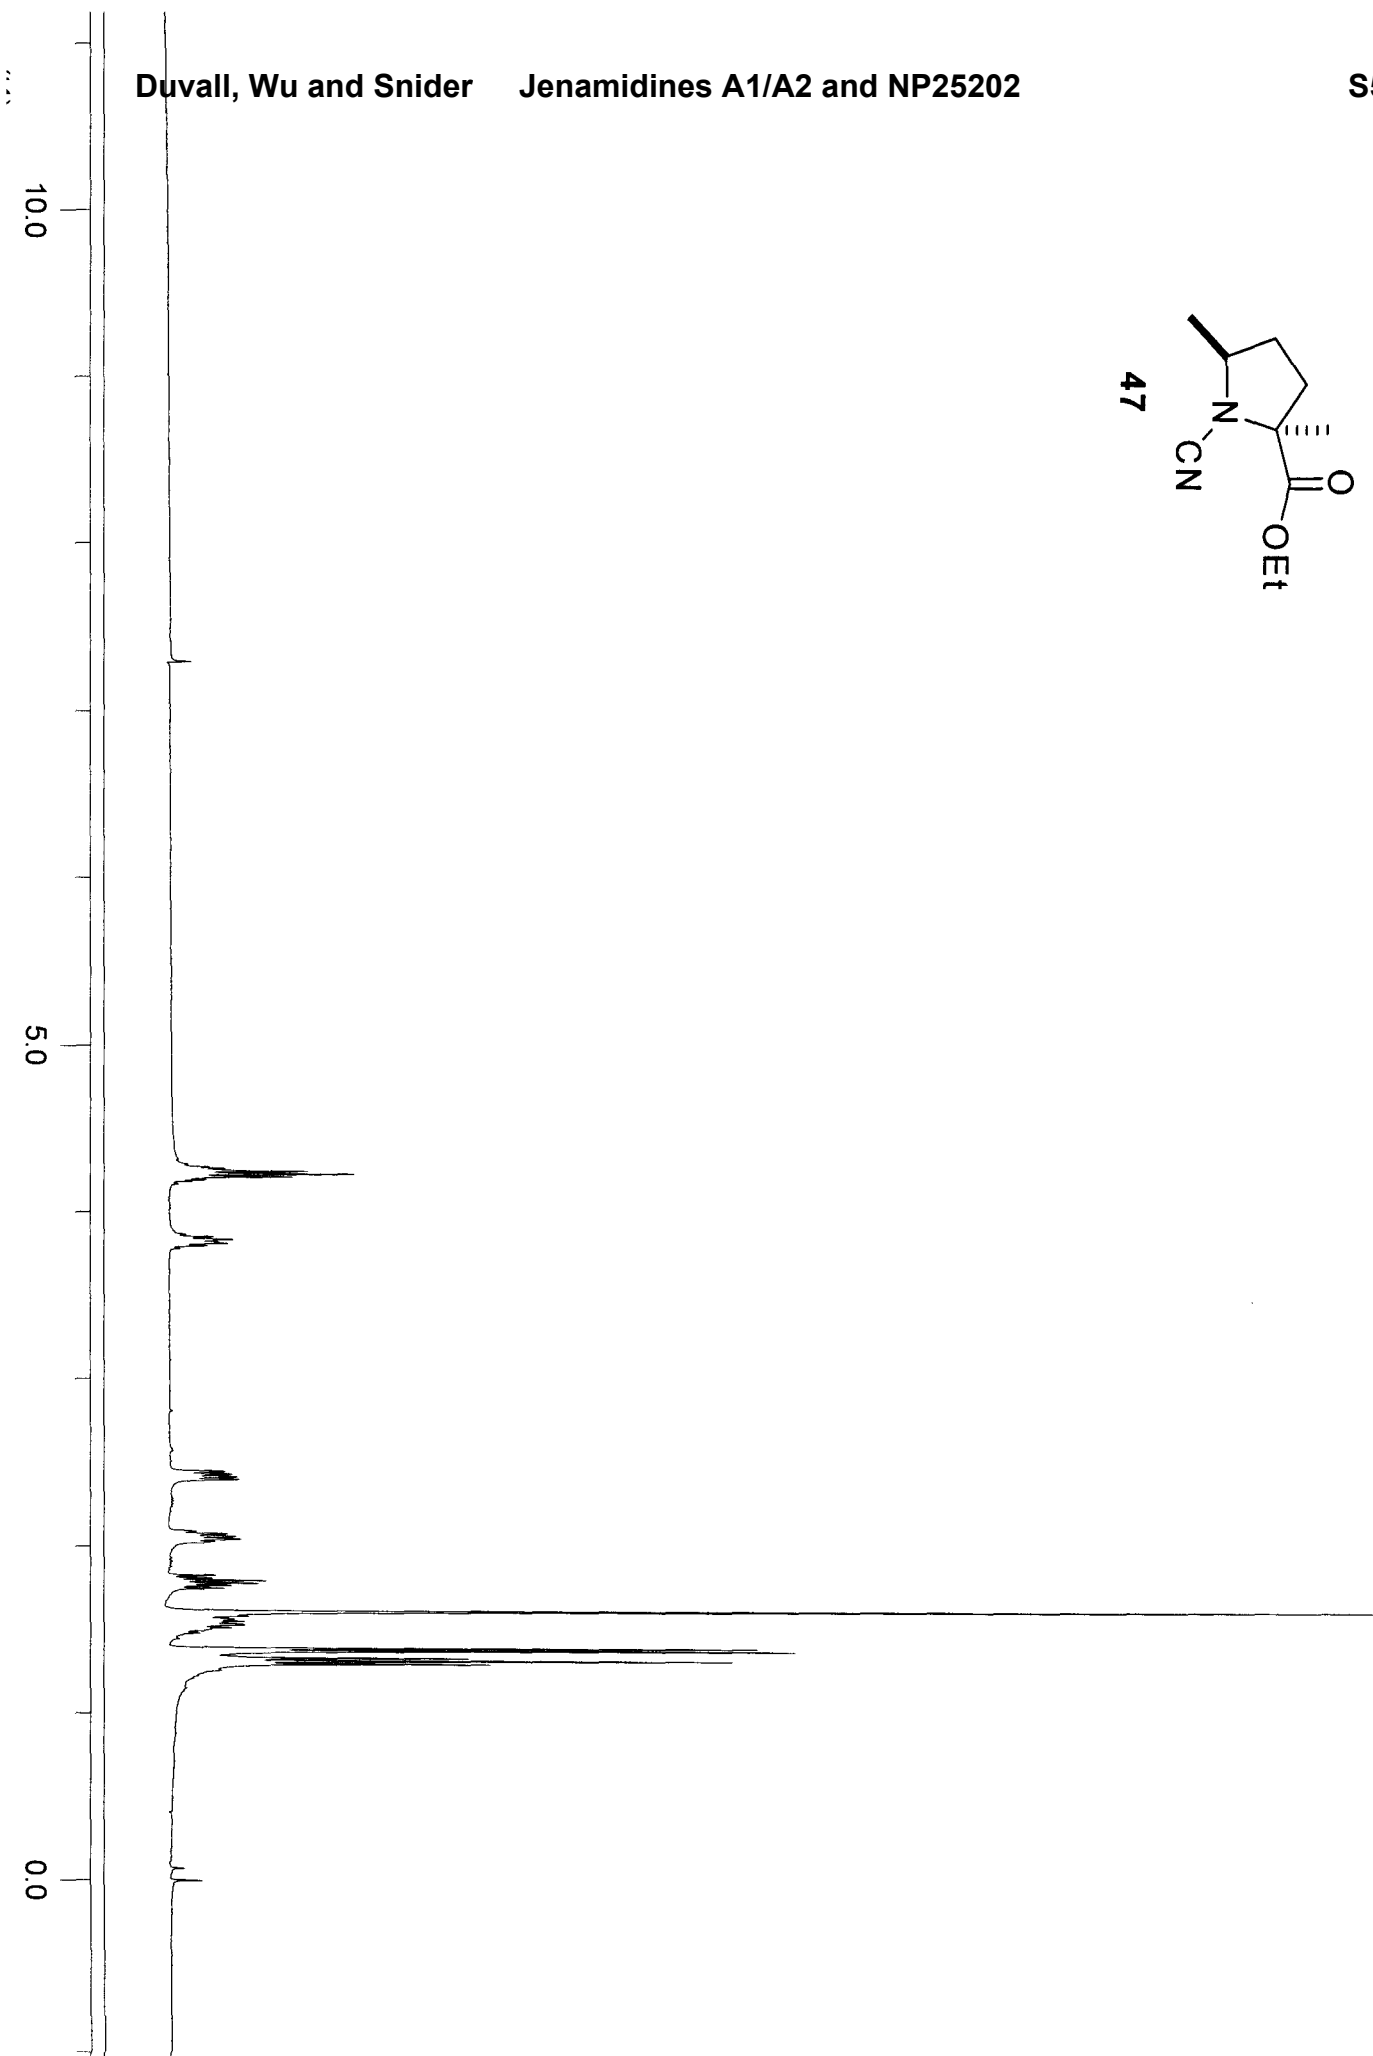

200  
150  
100  
50  
0

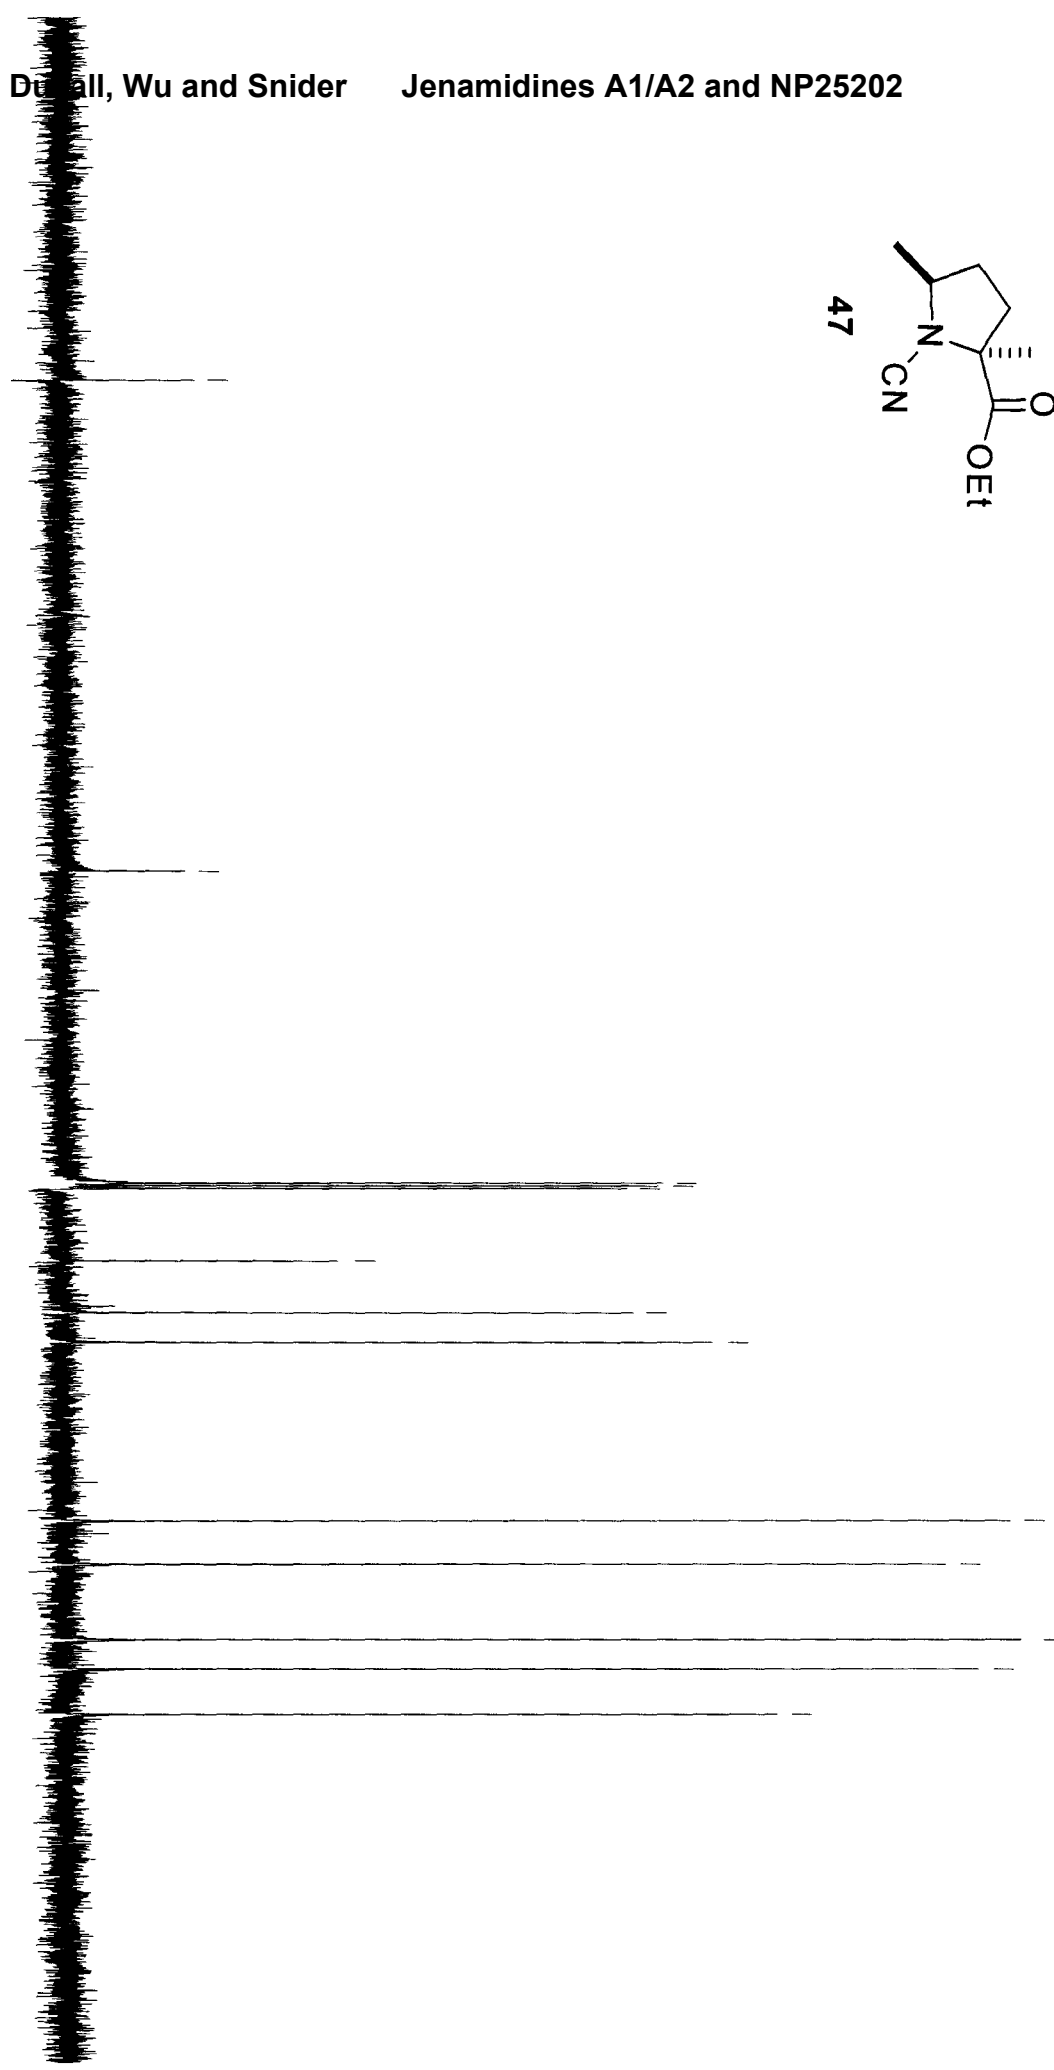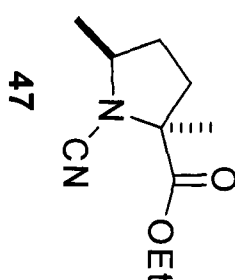

- 172.875
- 114.466
- 77.319
- 77.000
- 76.683
- 68.025
- 61.819
- 58.311
- 37.149
- 31.959
- 22.963
- 19.471
- 14.036

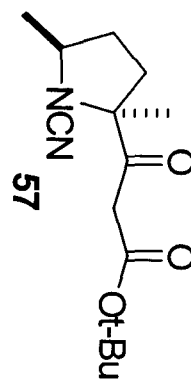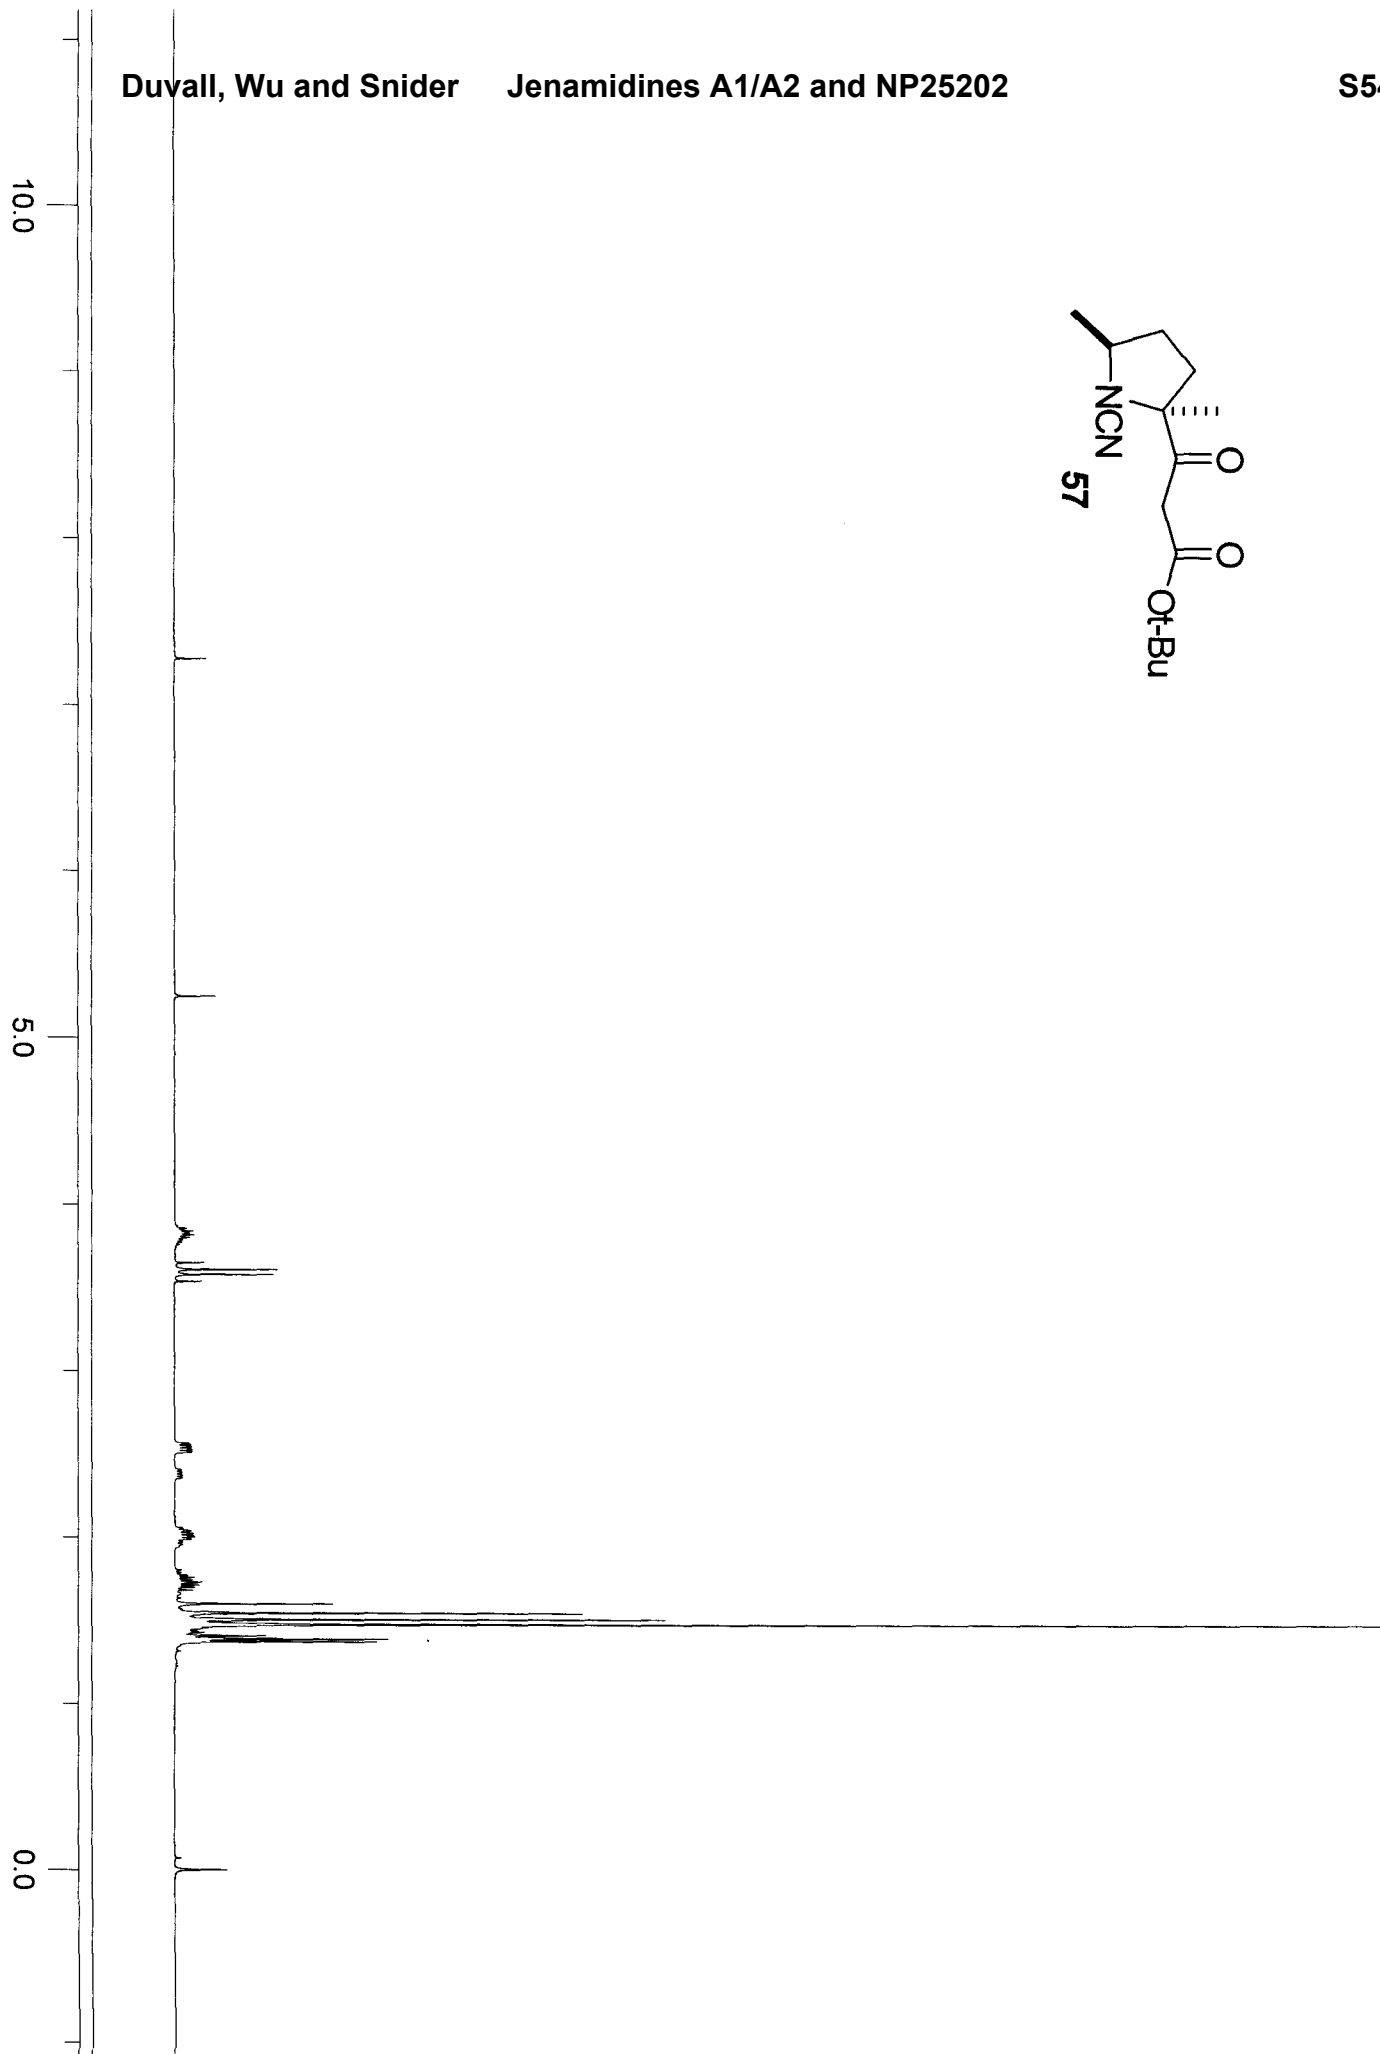

200  
150  
100  
50  
0

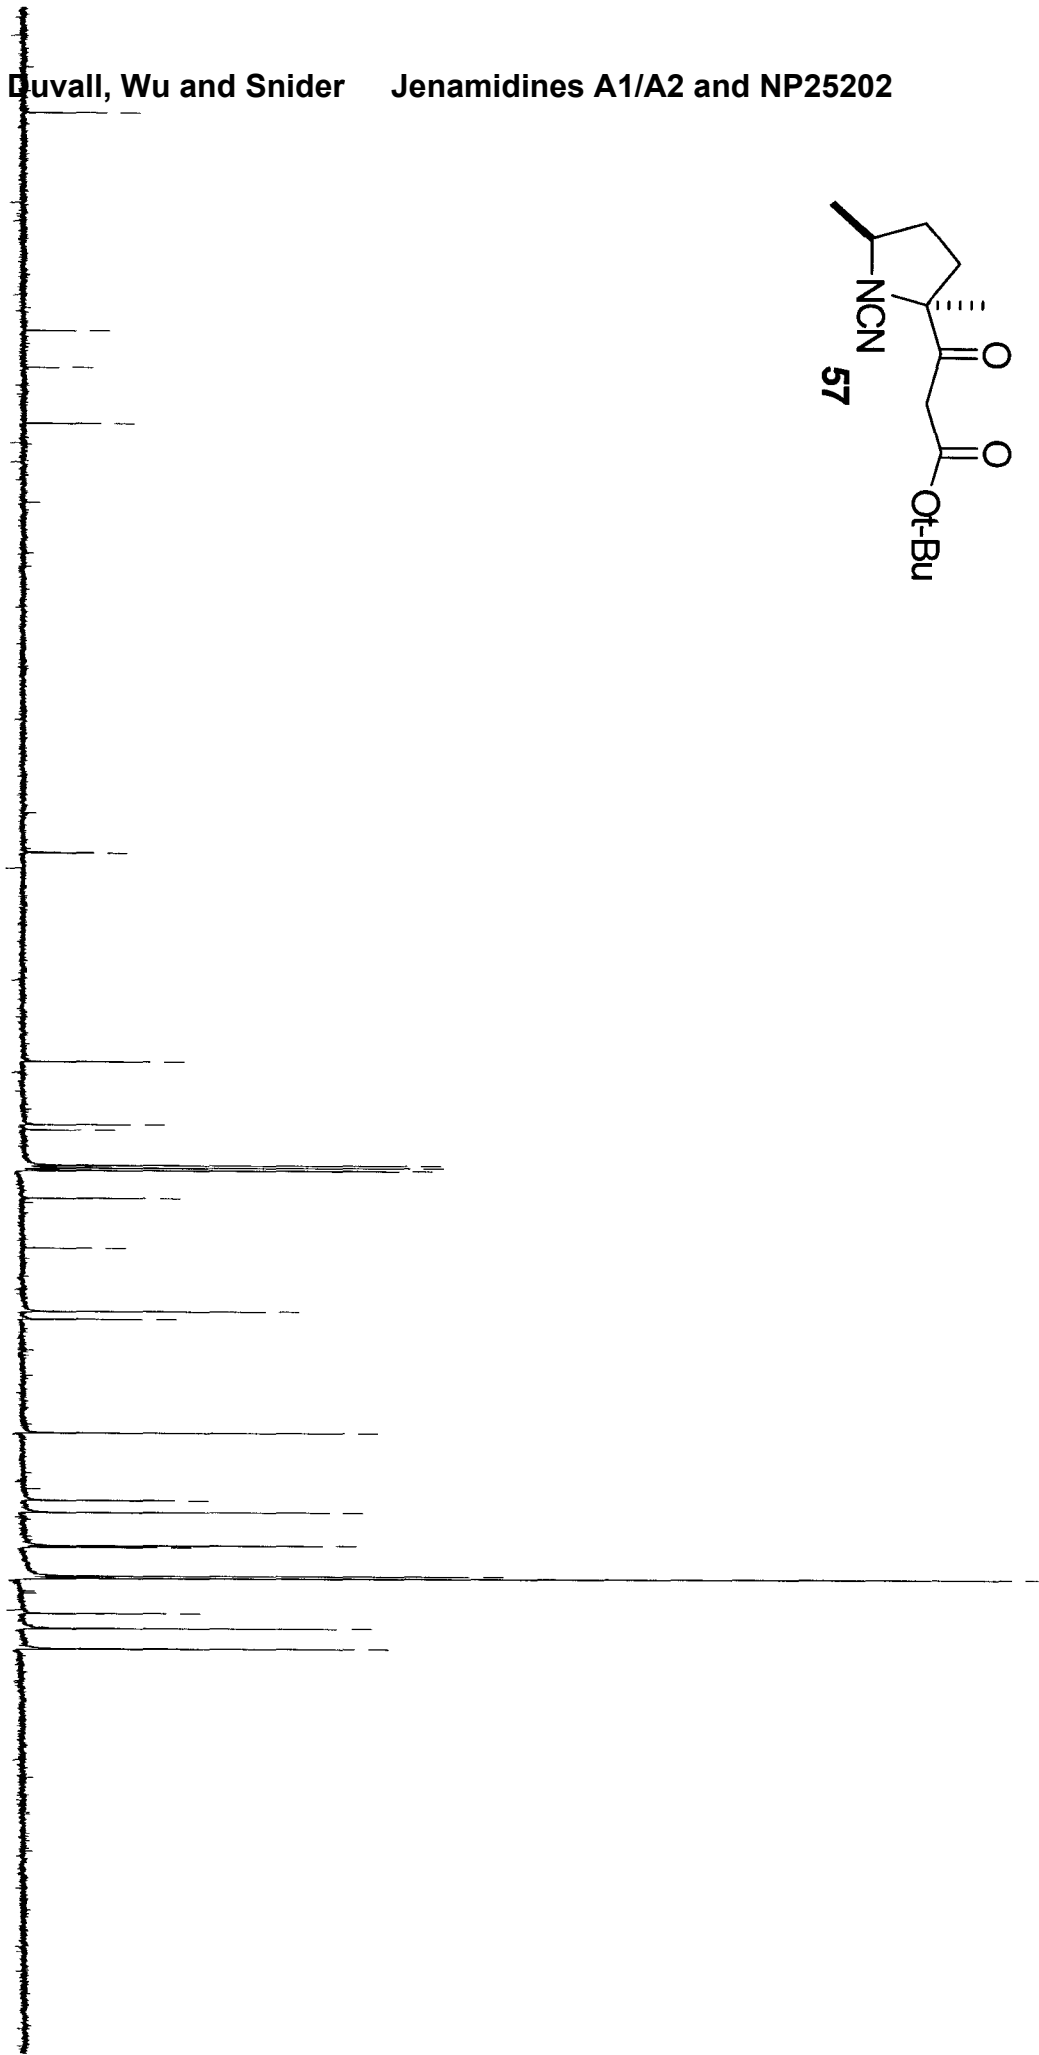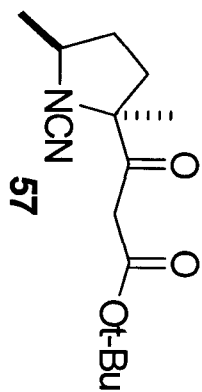

- 203.118
- 177.067
- 172.592
- 165.975
- 114.671
- 114.587
- 89.653
- 82.153
- 81.522
- 77.318
- 77.000
- 76.682
- 73.368
- 67.400
- 59.804
- 58.880
- 45.300
- 37.224
- 35.768
- 31.798
- 31.592
- 28.143
- 27.856
- 23.669
- 21.896
- 19.452
- 19.413

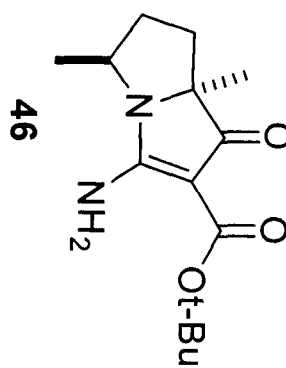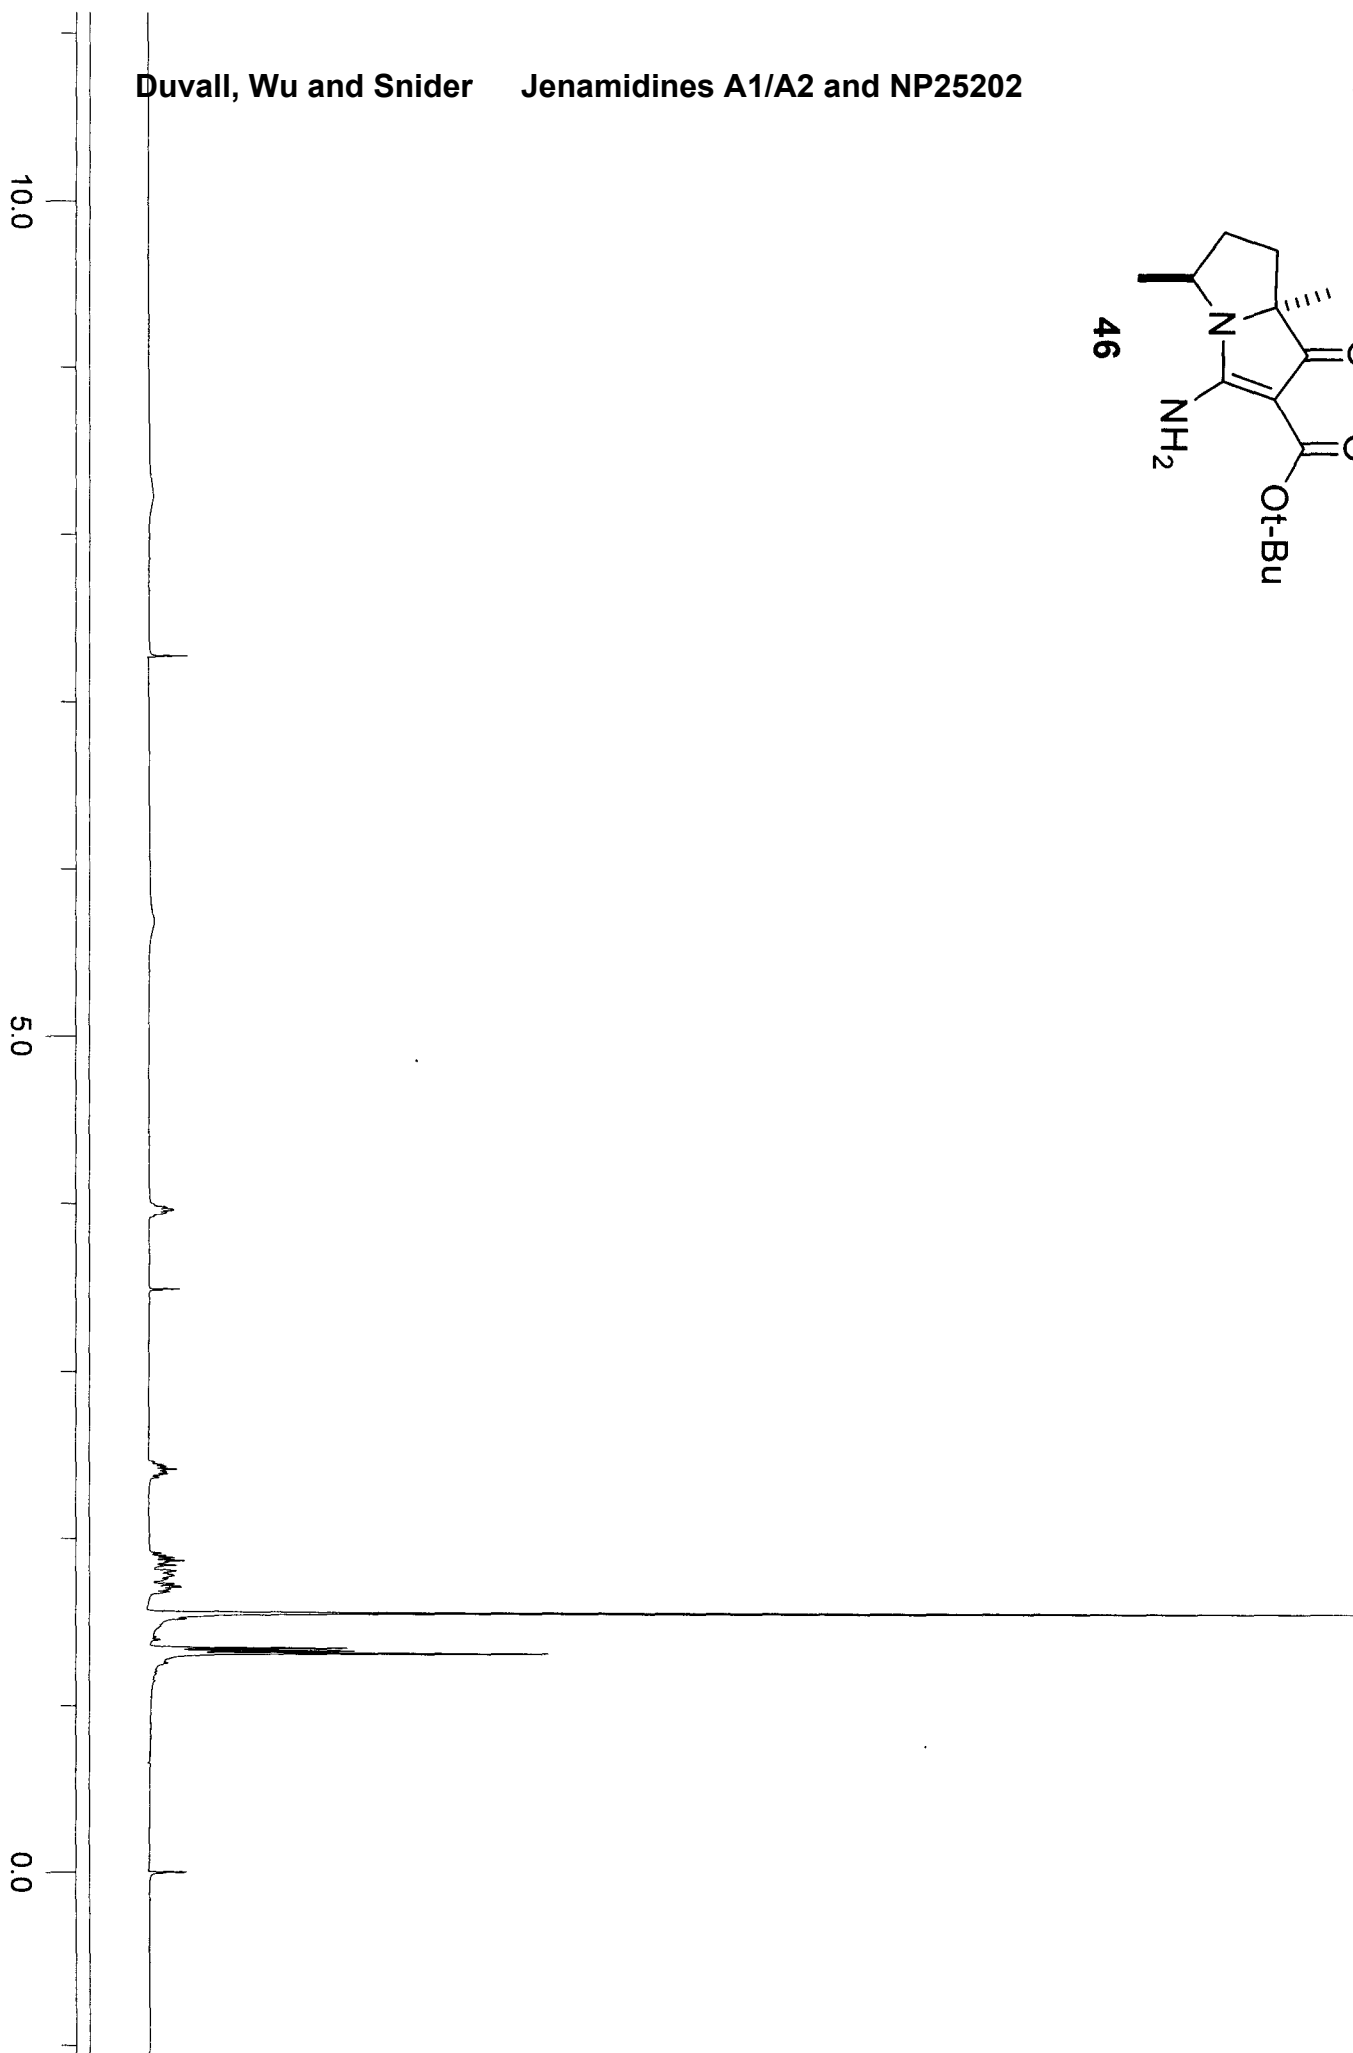



200  
150  
100  
50  
0

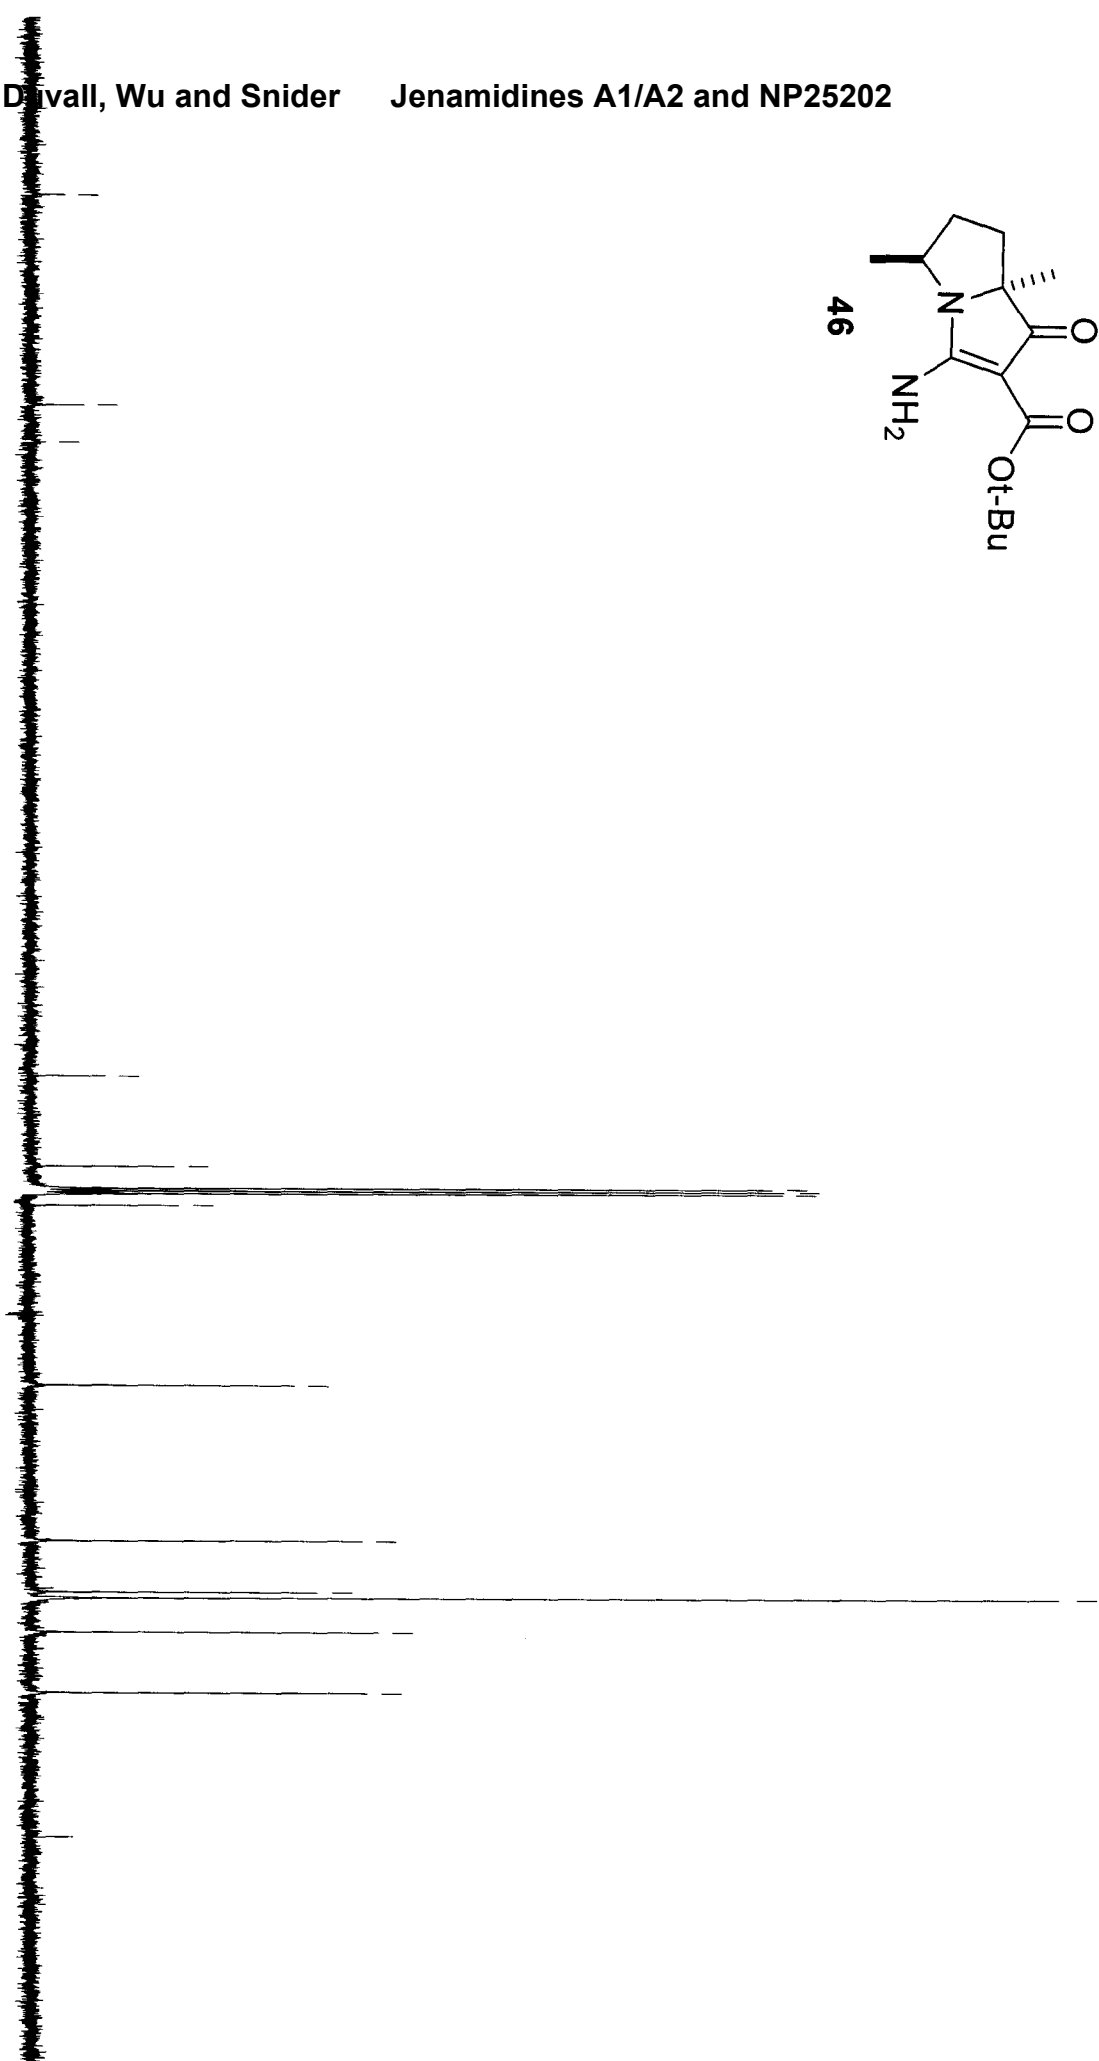

- 195.805
- 170.621
- 166.152
  
- 90.675
- 79.921
- 77.318
- 77.000
- 76.682
- 75.291
  
- 53.862
  
- 35.324
- 29.210
- 28.526
- 24.442
- 17.250

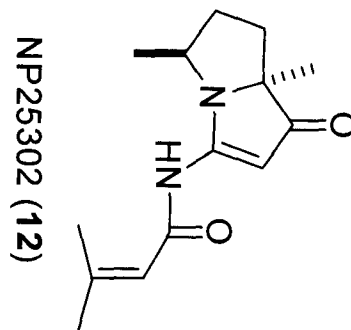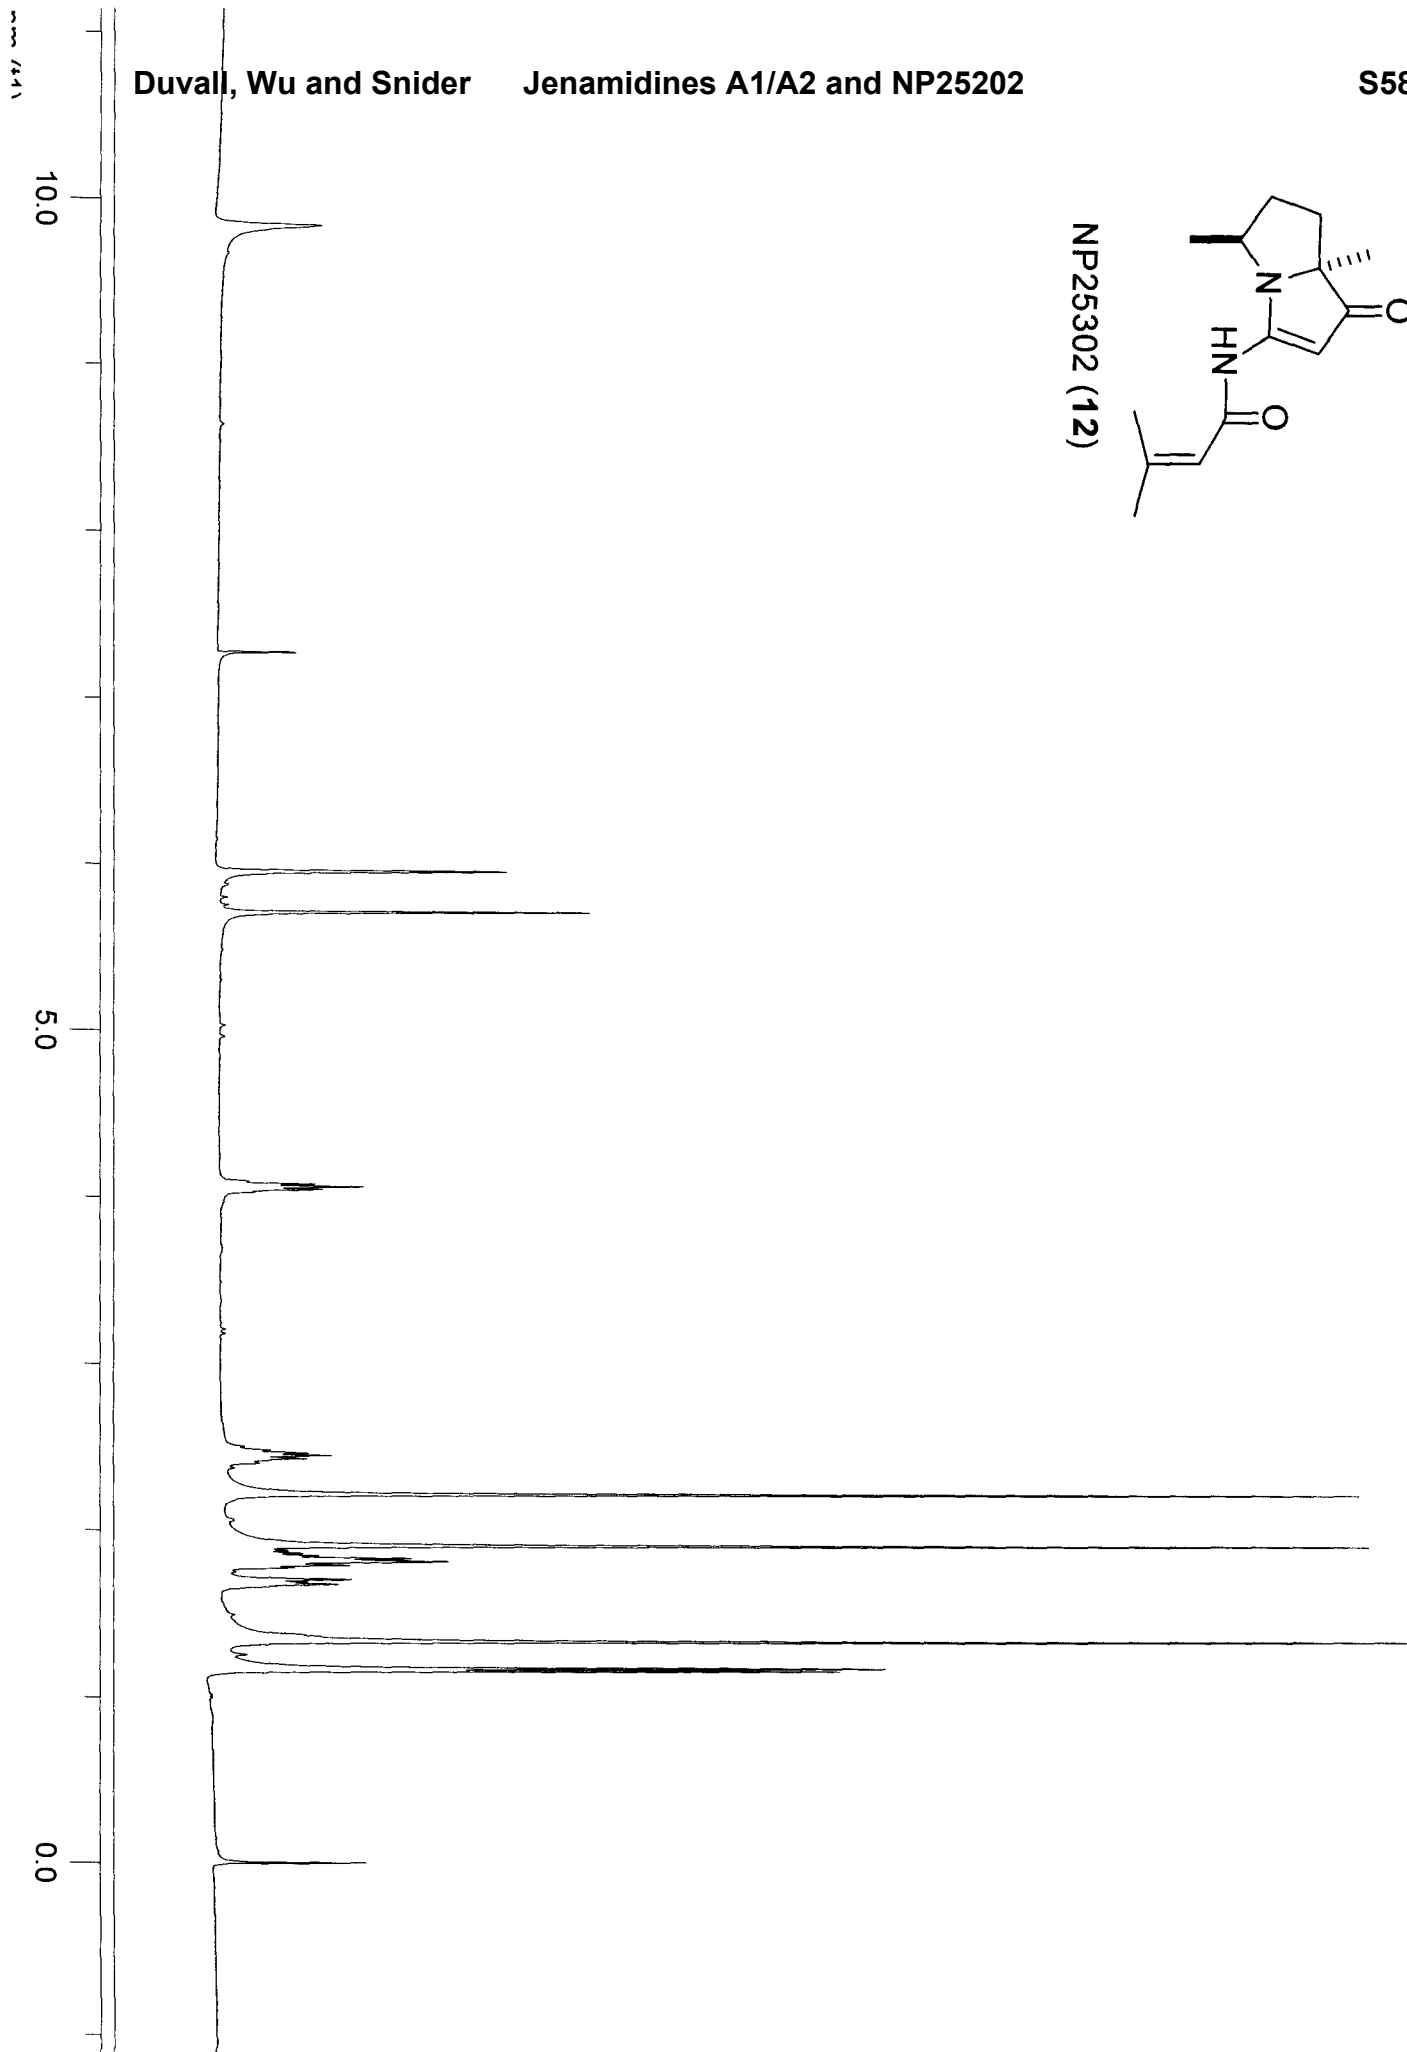

200  
150  
100  
50  
0

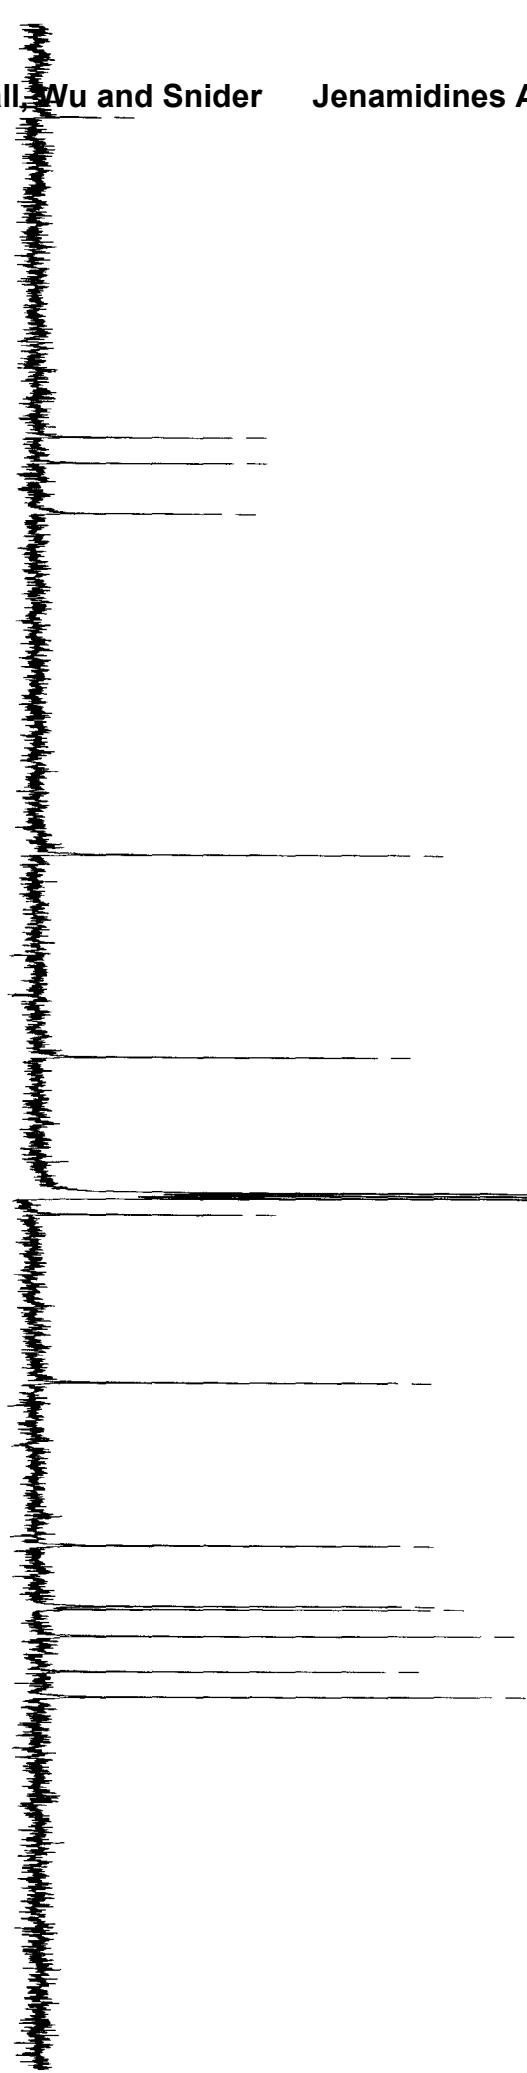

NP25302 (12)

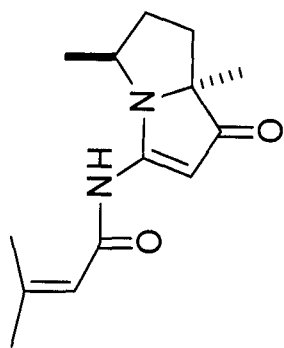

- 205.447
- 167.281
- 164.193
- 158.211
- 117.587
- 93.509
- 77.318
- 77.000
- 76.682
- 74.750
- 54.757
- 35.412
- 28.188
- 27.793
- 24.625
- 20.447
- 17.437

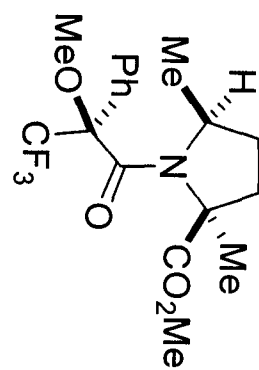

63 (S-Mosher amide)

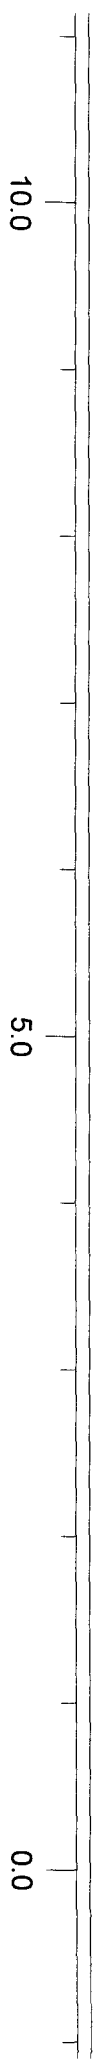

63 (S-Mosher amide)

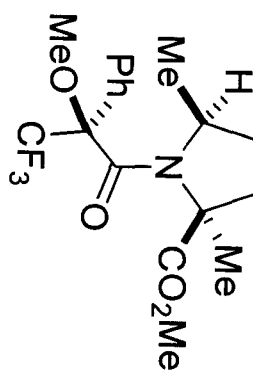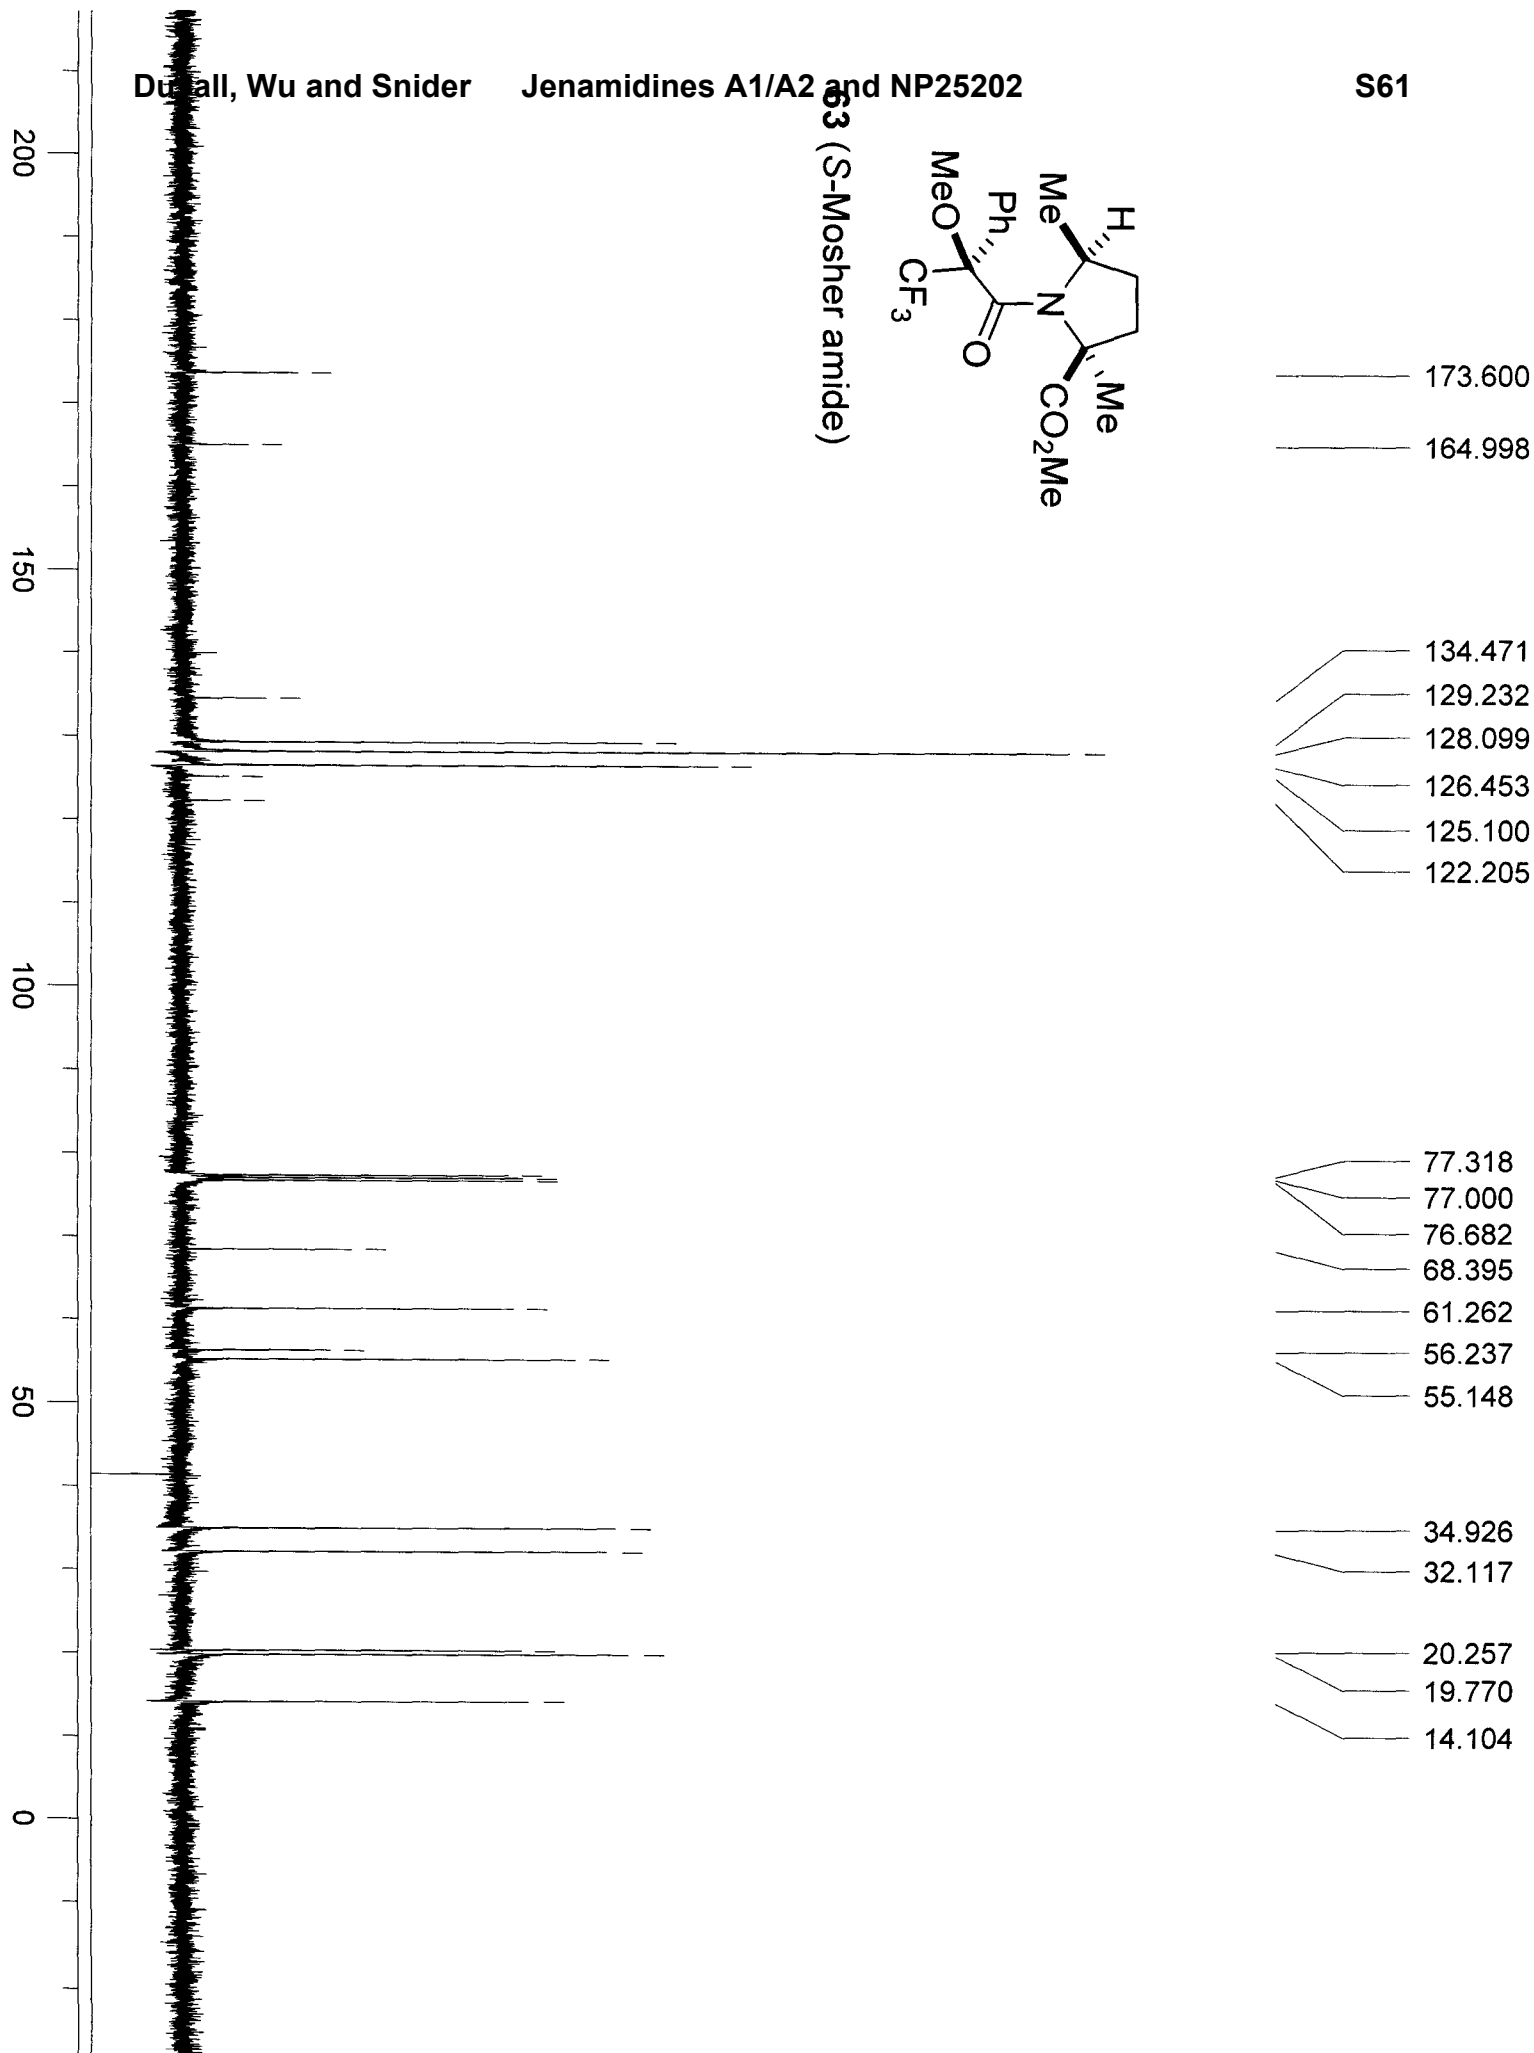

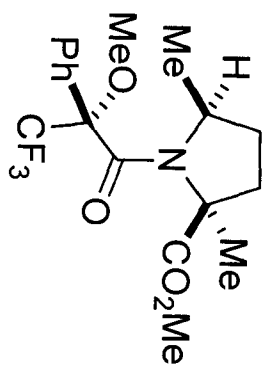**64** (*R*-Mosher amide)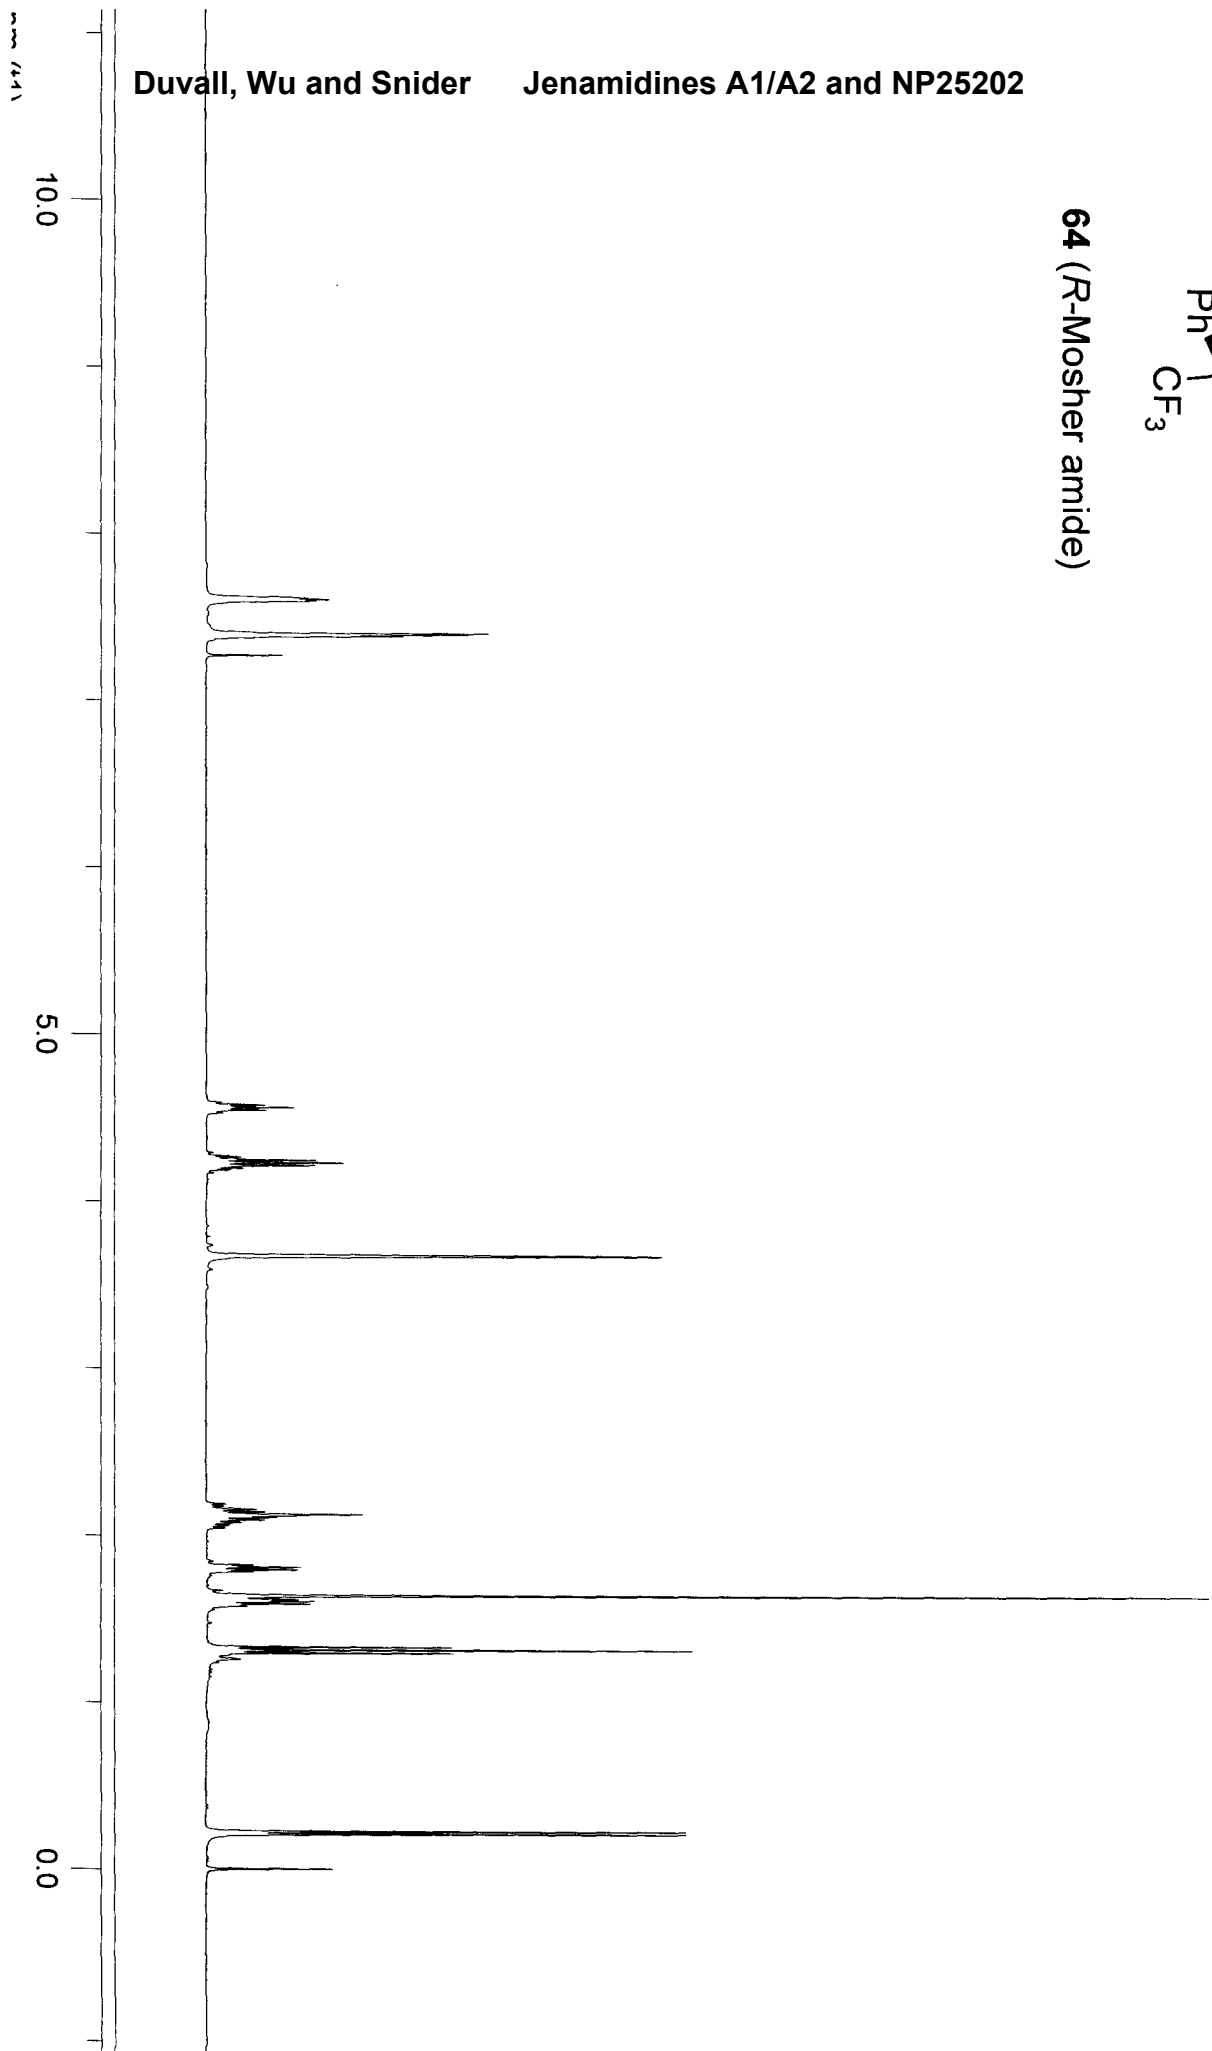

64 (*R*-Mosher amide)

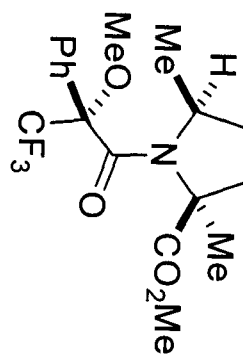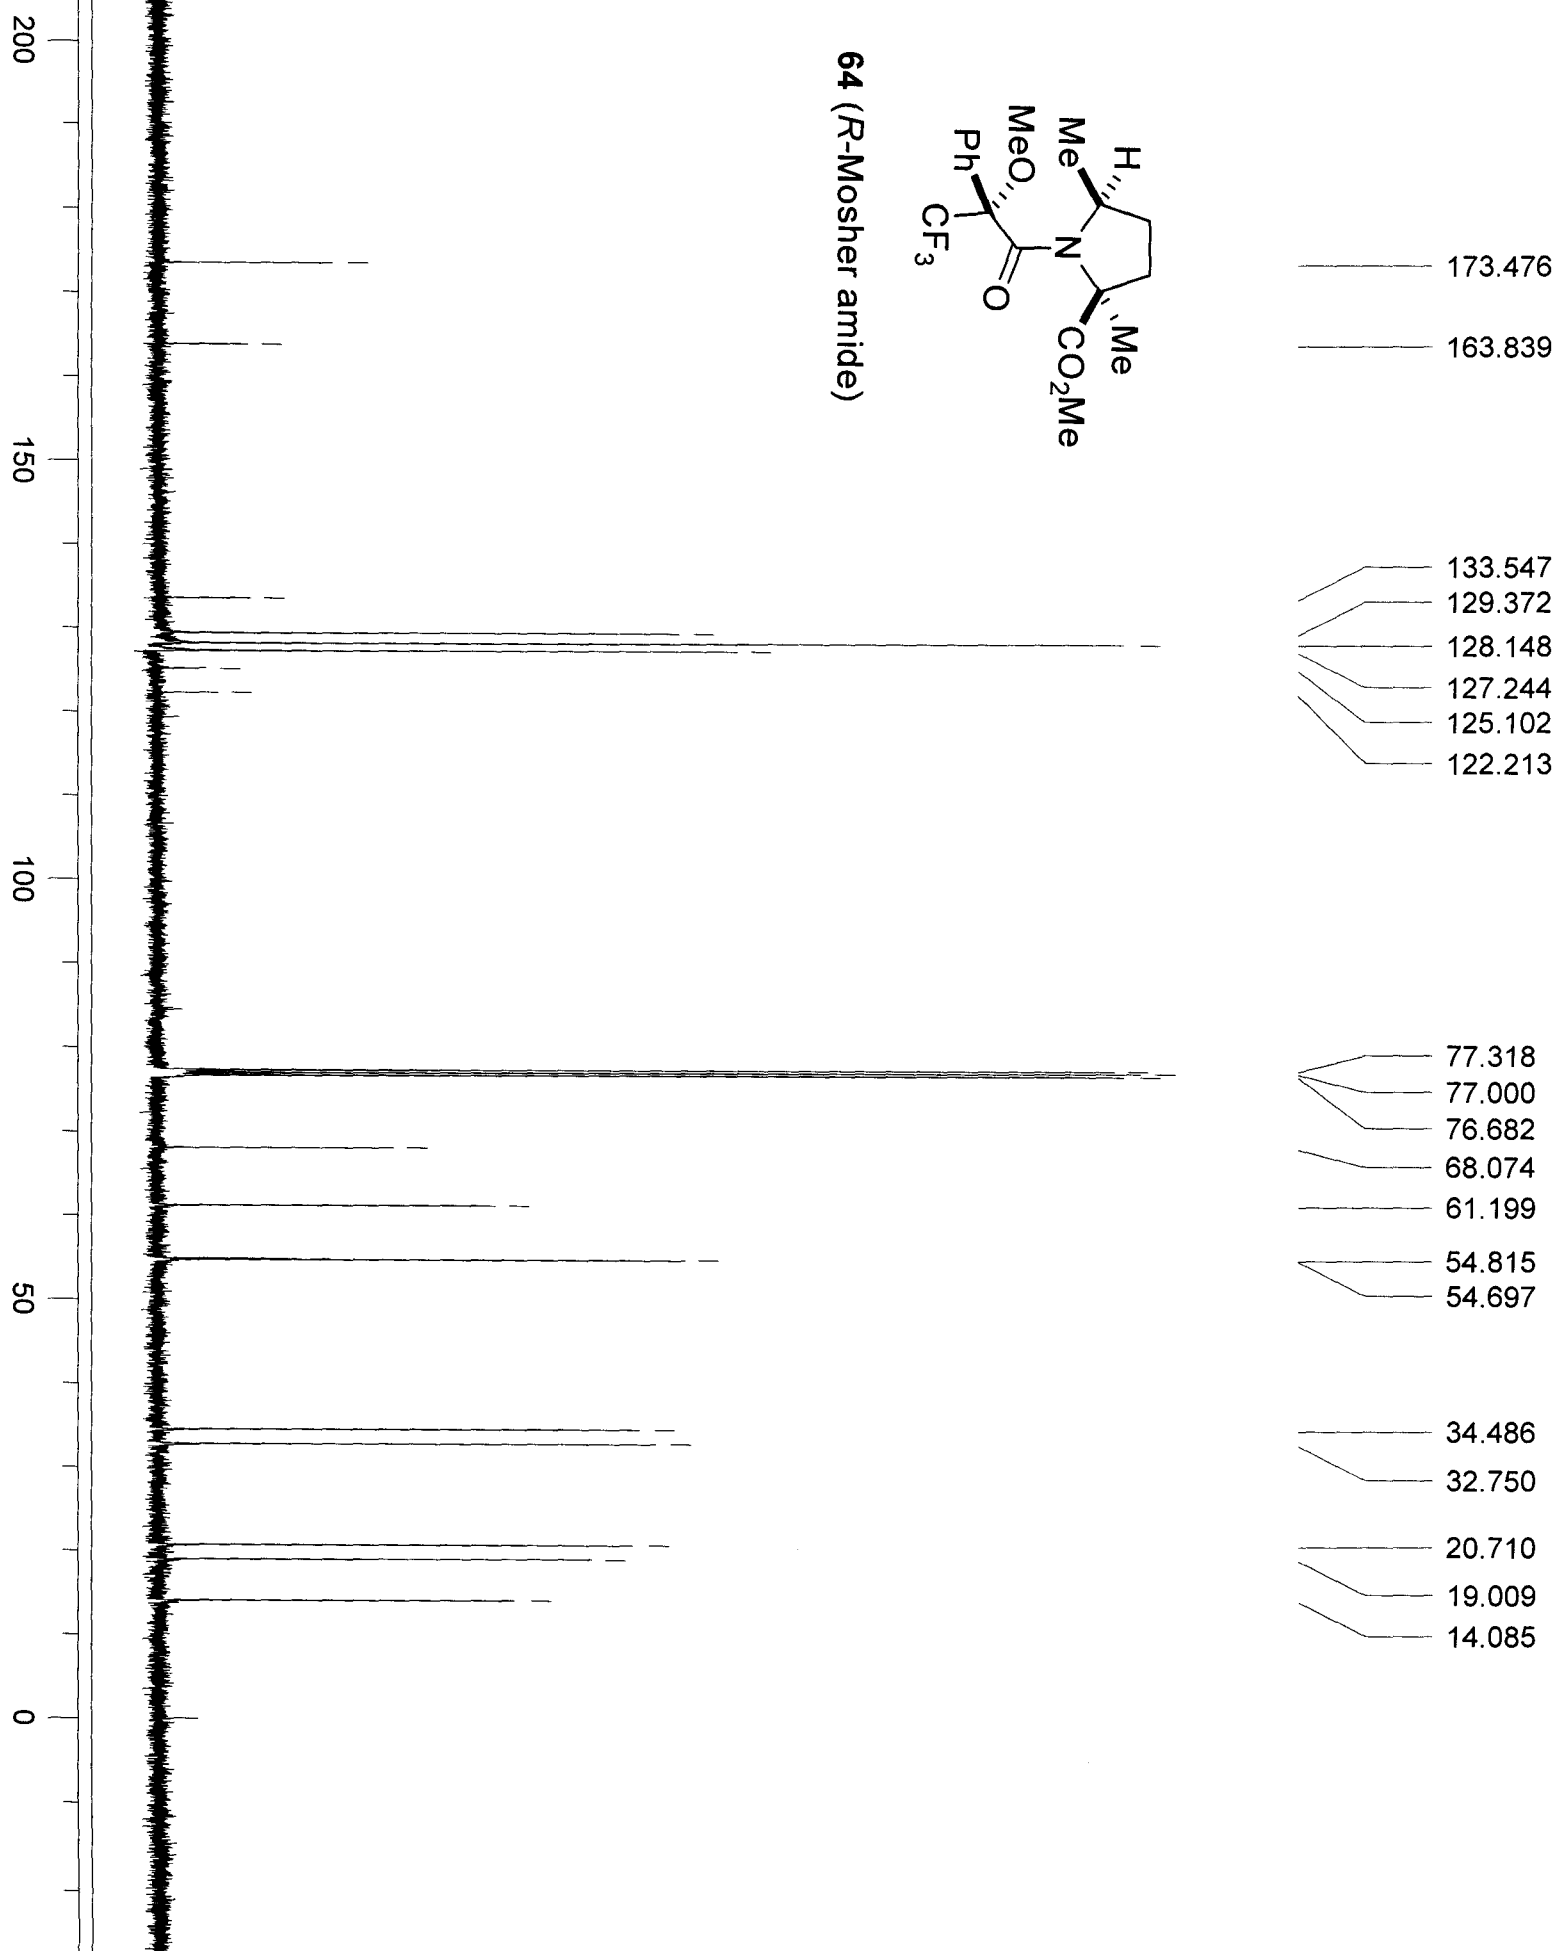

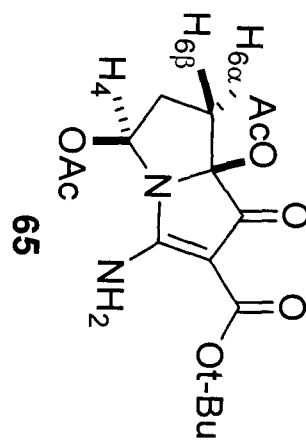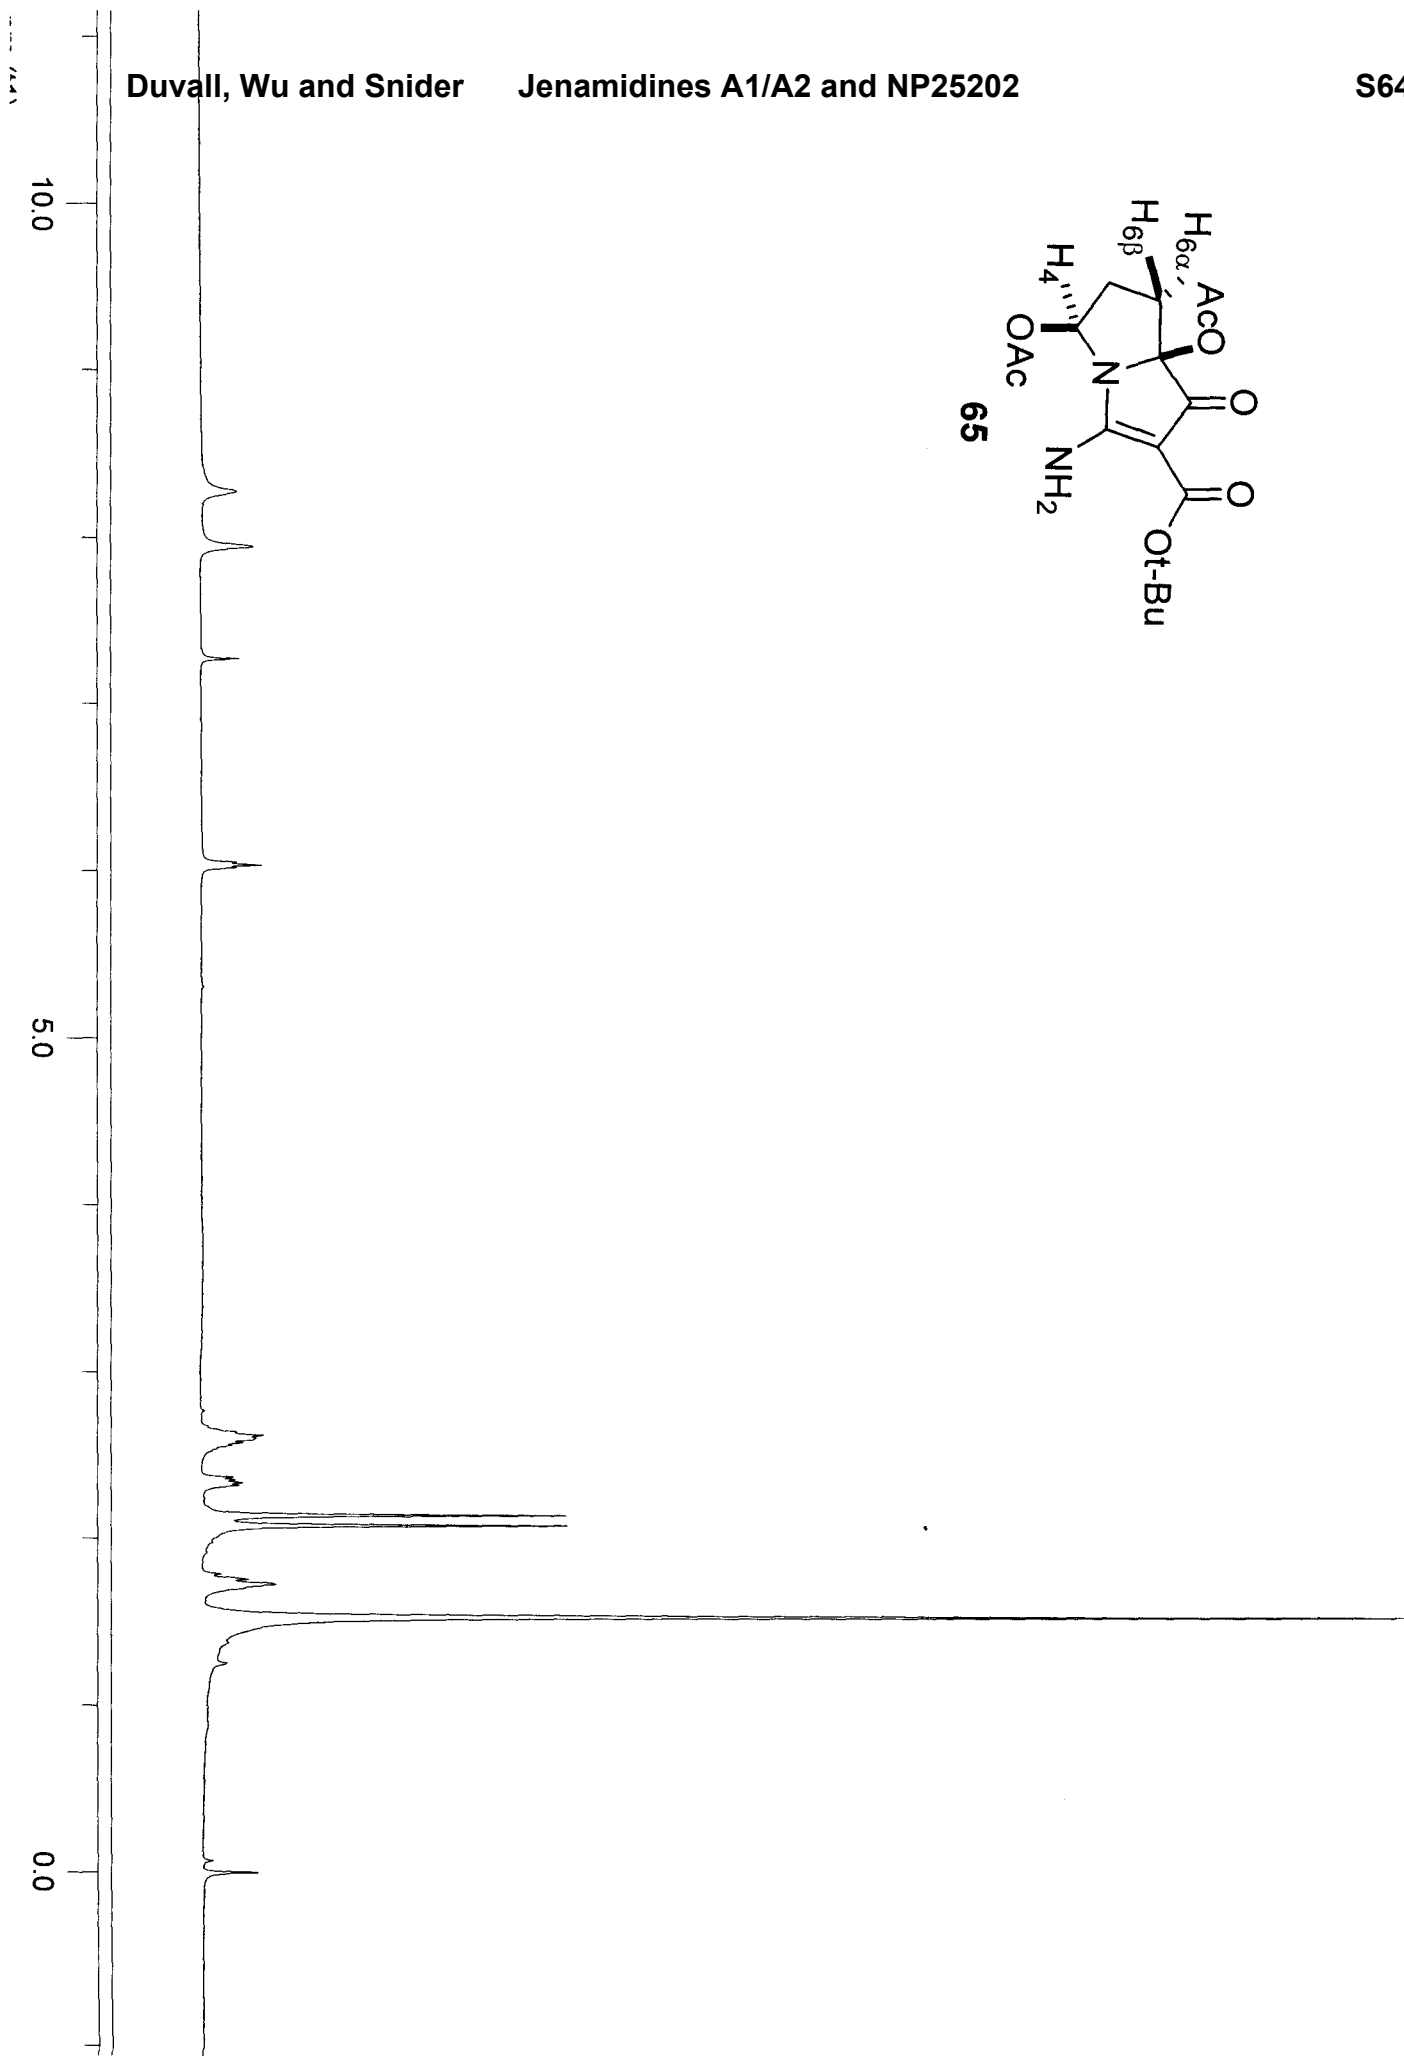



200  
150  
100  
50  
0

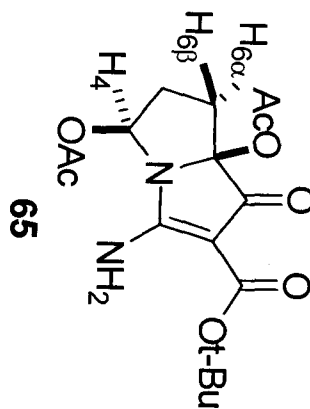

- 184.982
- 173.176
- 171.282
- 168.247
- 165.201
  
- 97.613
- 88.185
- 84.202
- 80.430
- 77.318
- 77.000
- 76.682
  
- 32.162
- 31.868
- 28.427
- 21.262
- 20.972

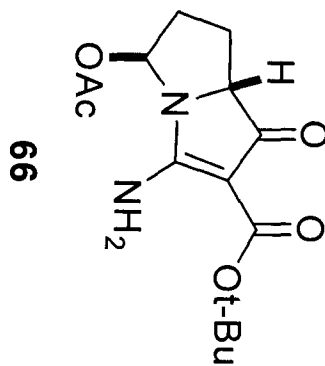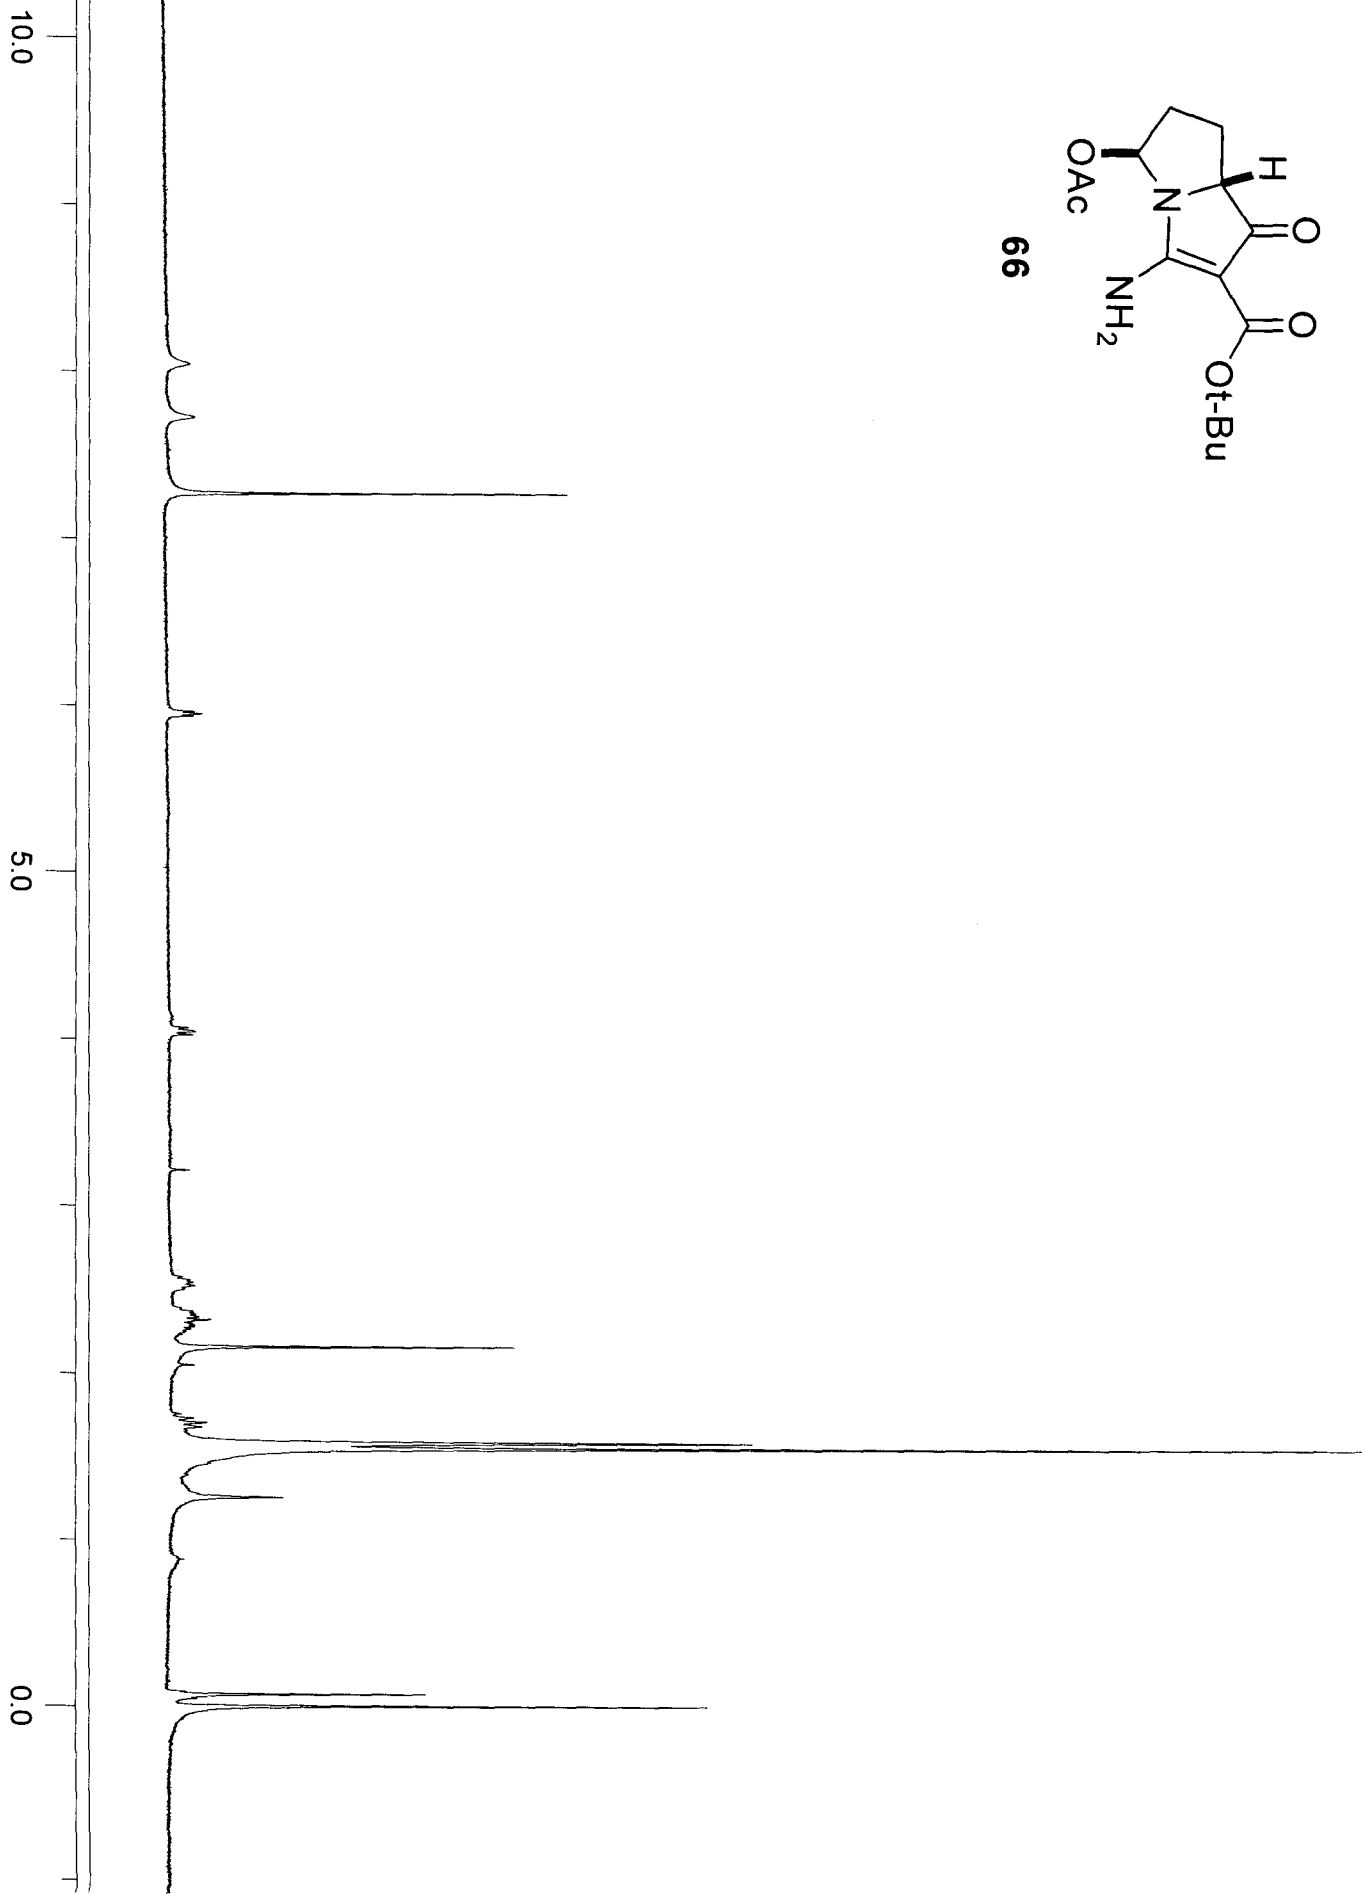

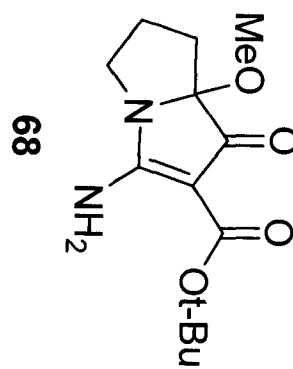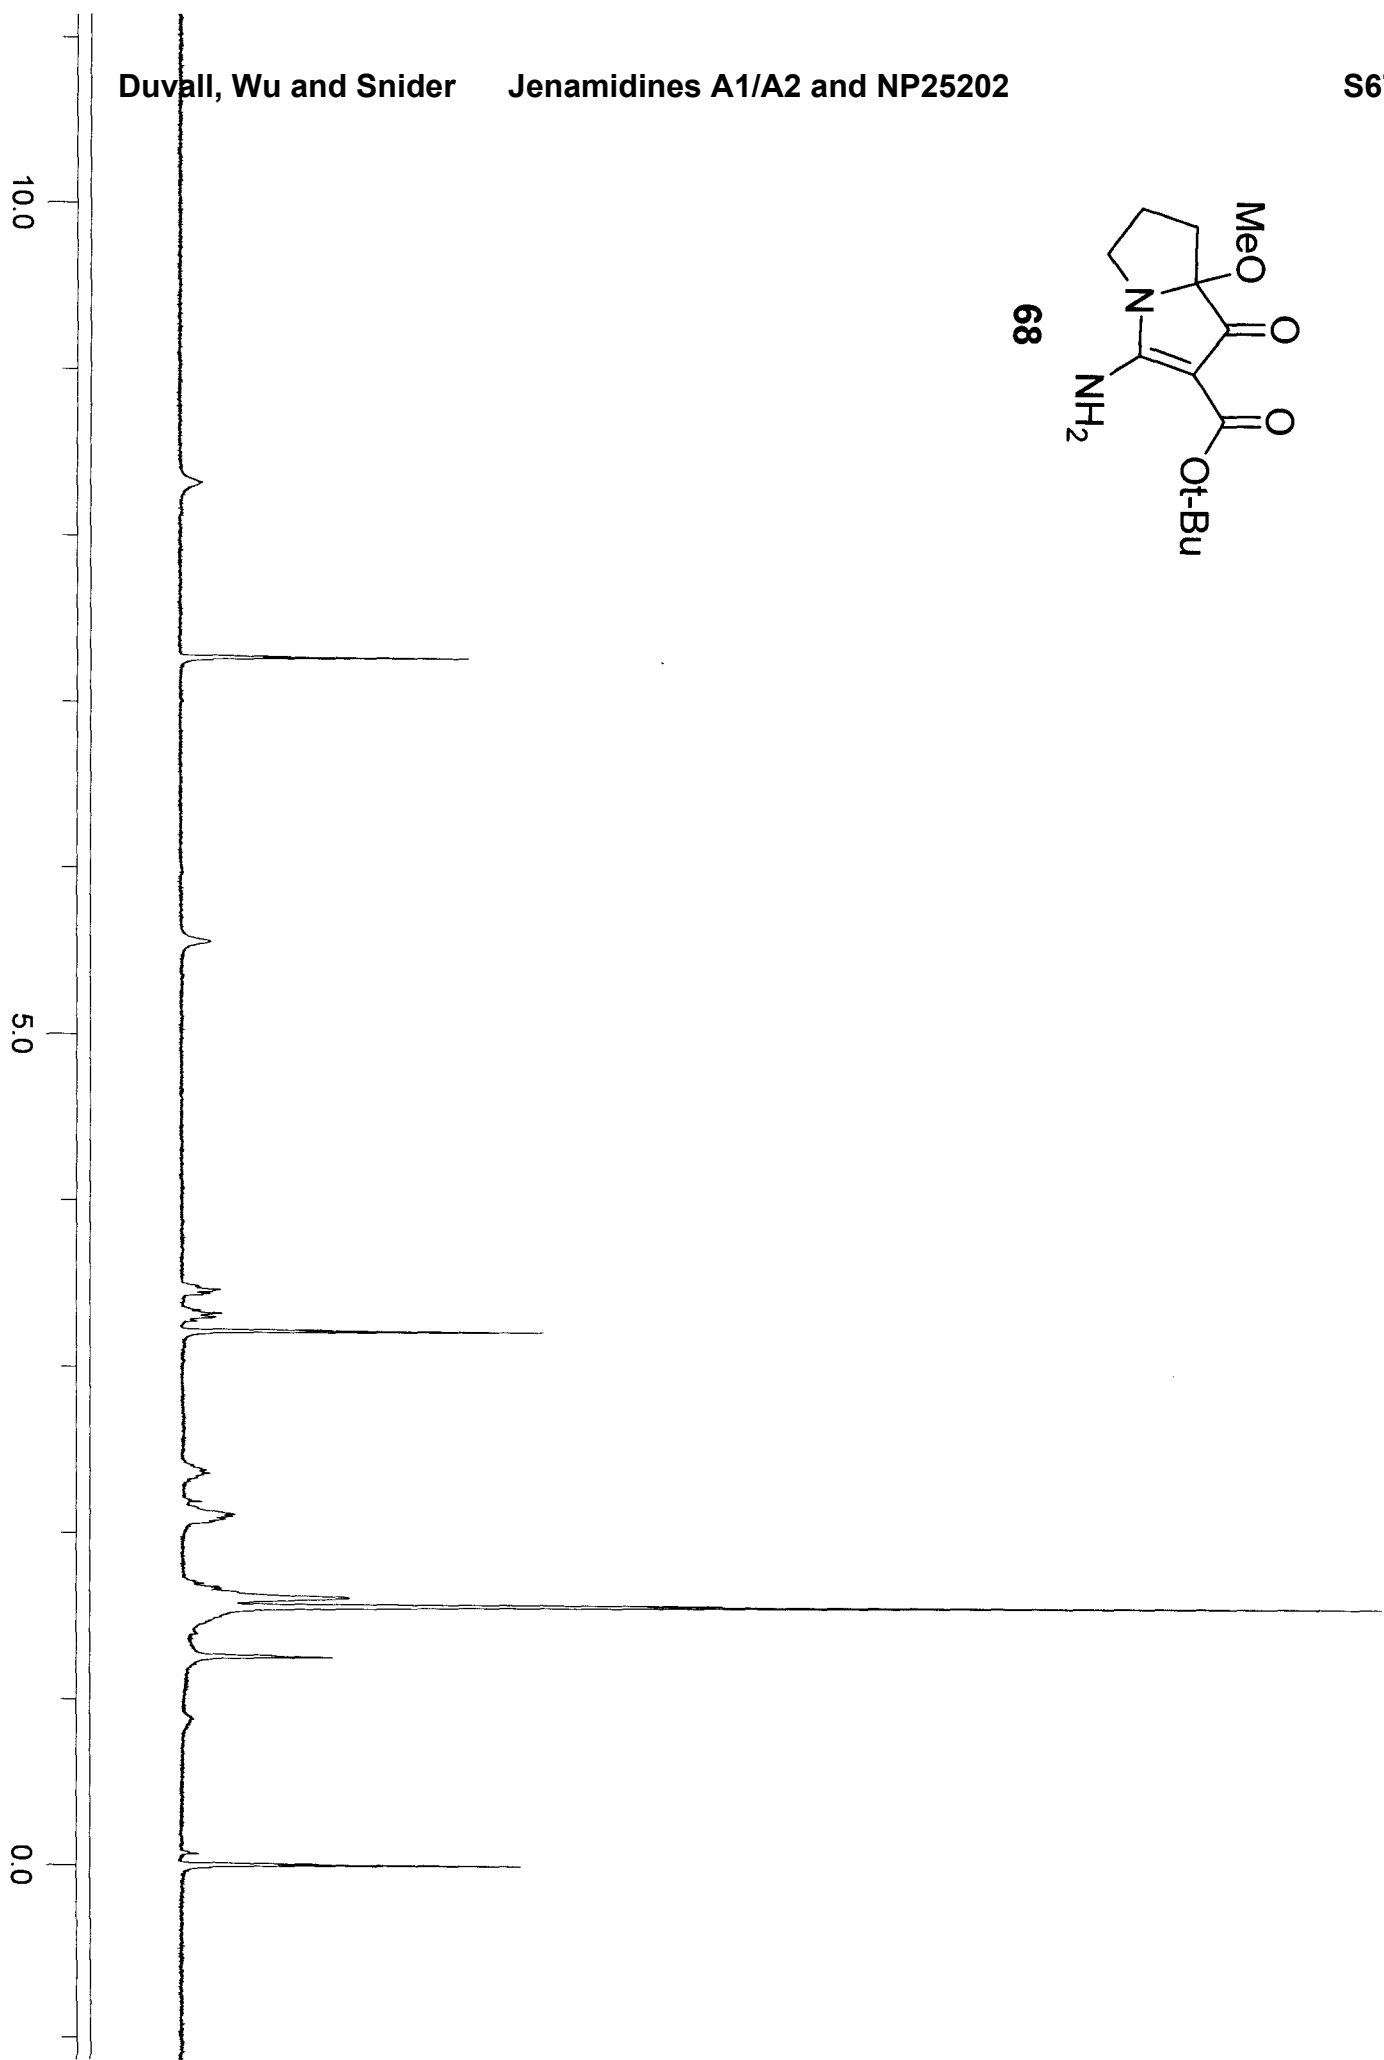

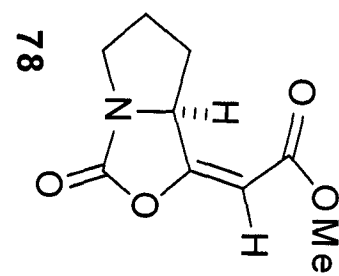

ppm (t1)

10.0

5.0

0.0

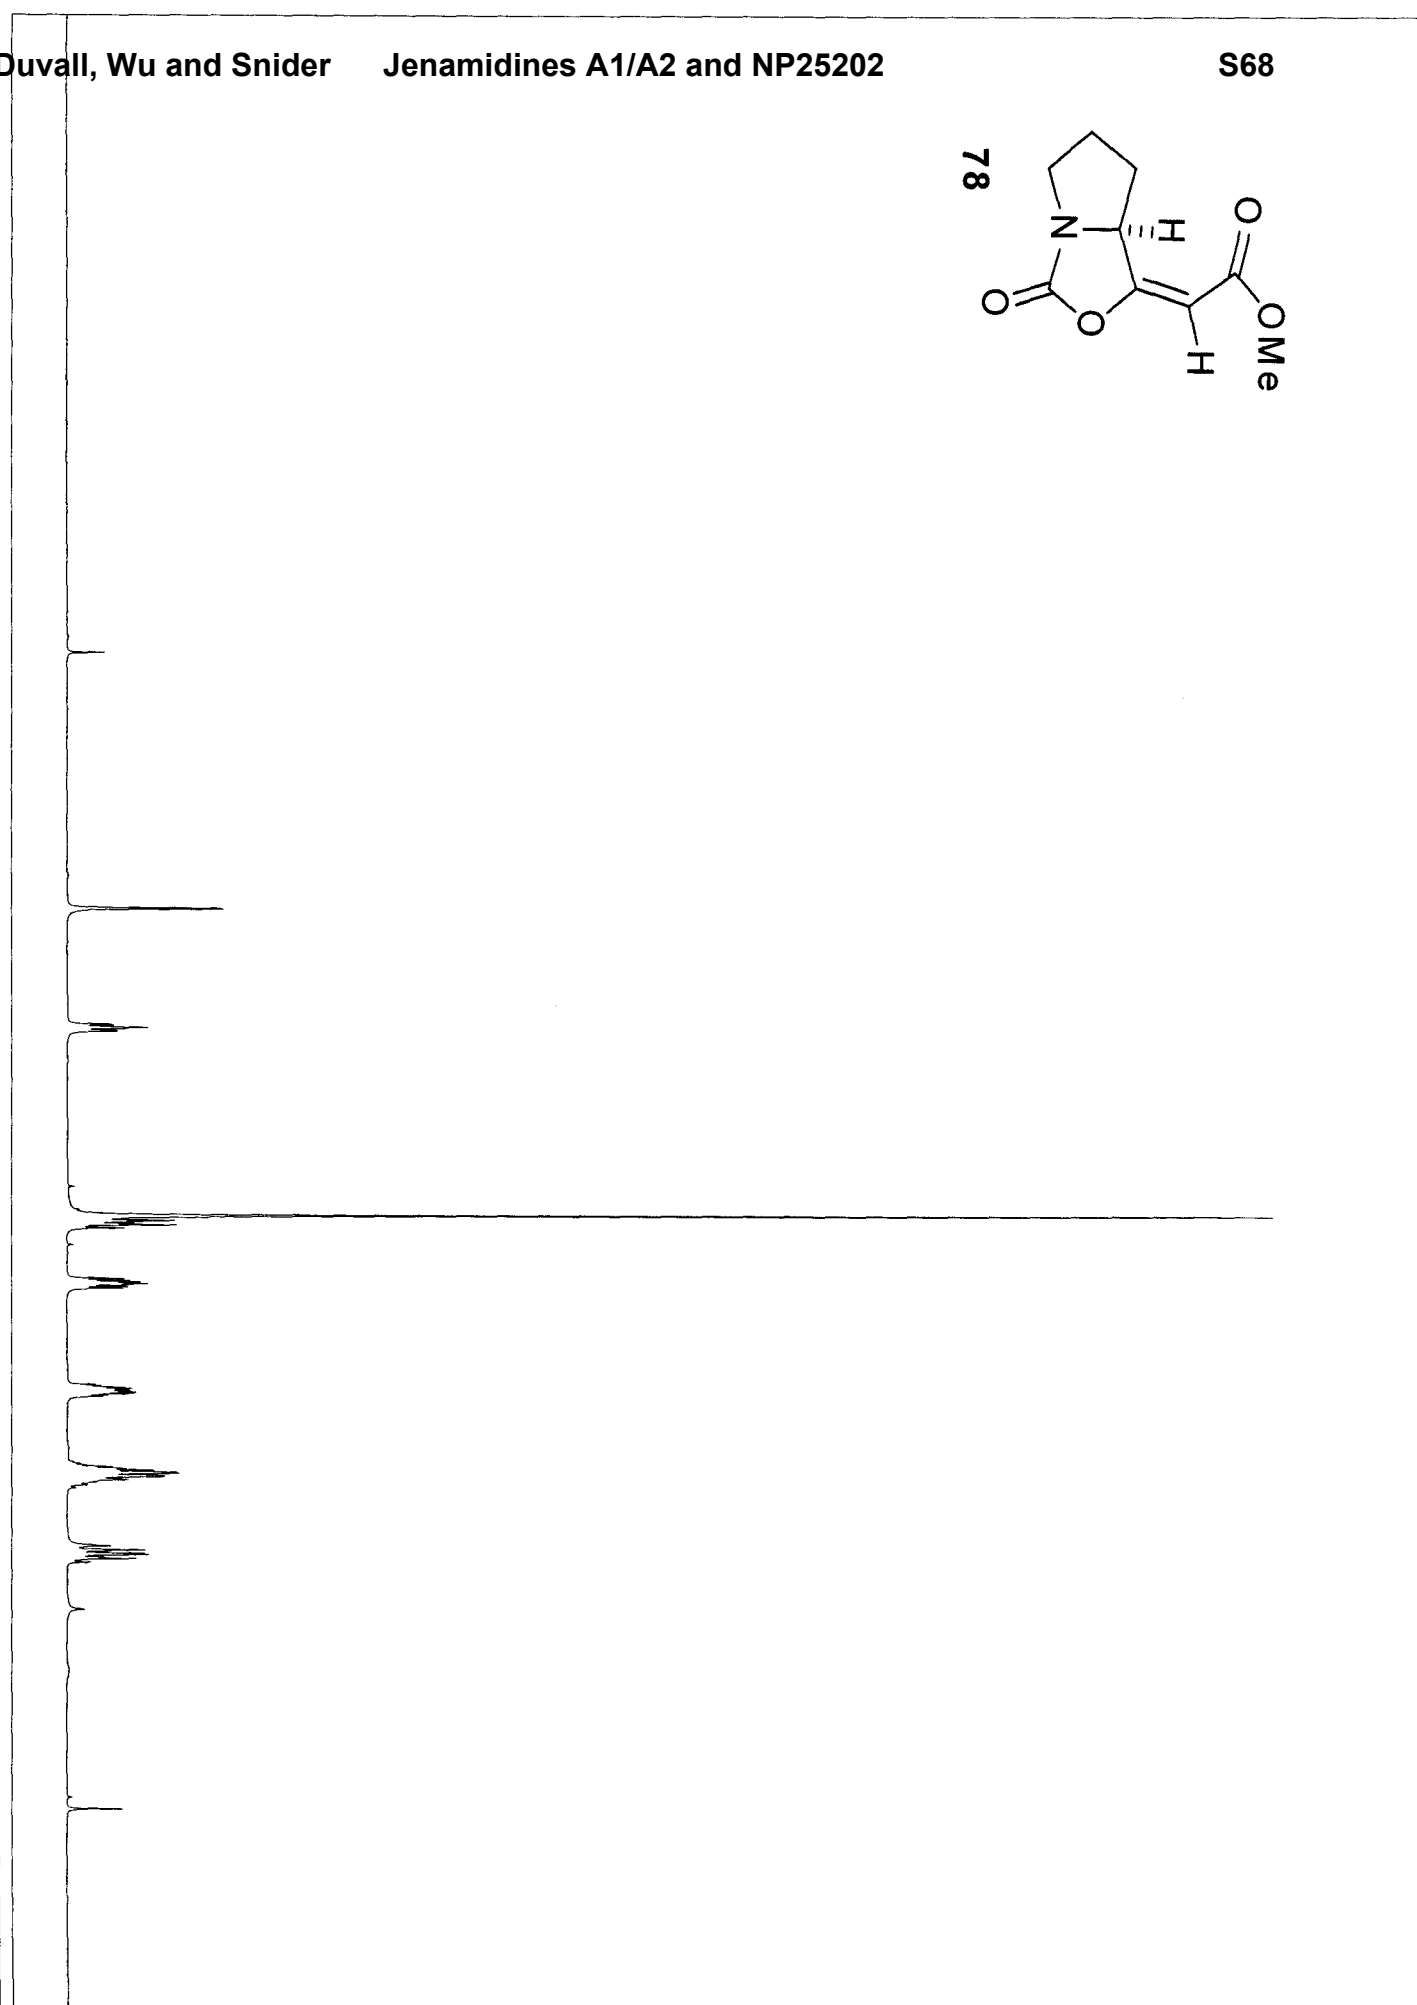

200  
150  
100  
50  
0

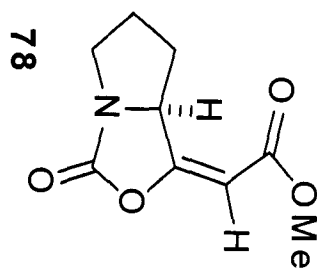

- 166.557
- 165.640
- 156.643
  
- 95.270
  
- 77.318
- 77.000
- 76.682
- 64.186
  
- 51.417
- 45.914
  
- 30.216
- 26.233

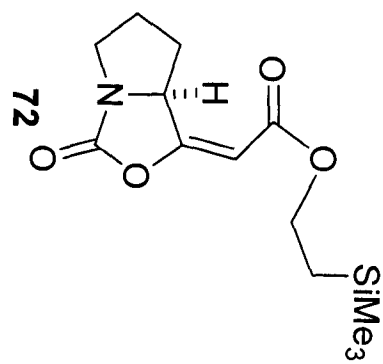

ppm (t1)

10.0

5.0

0.0

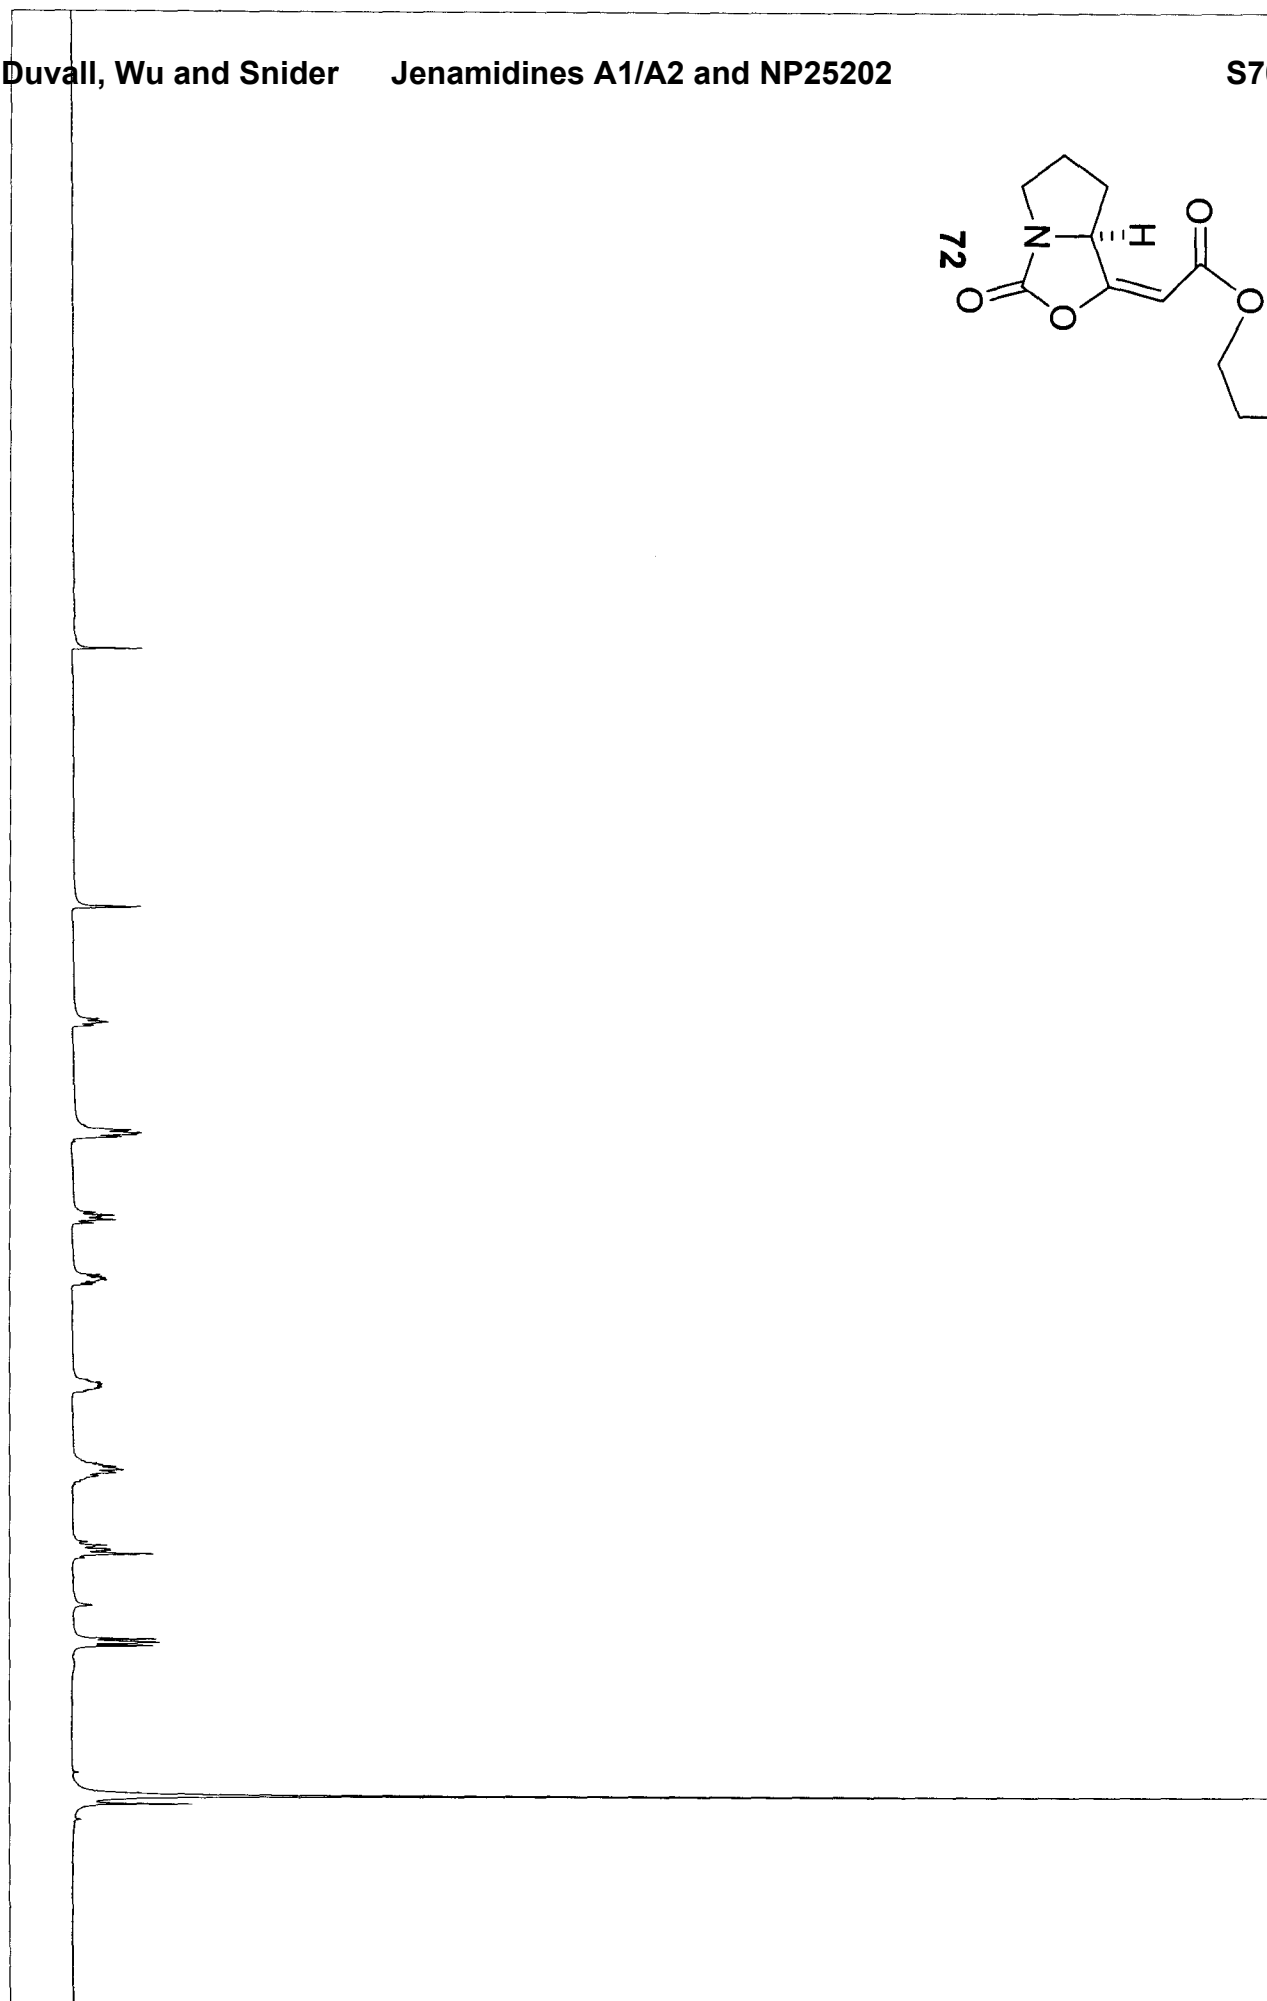

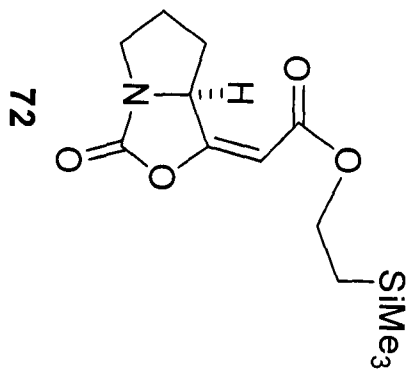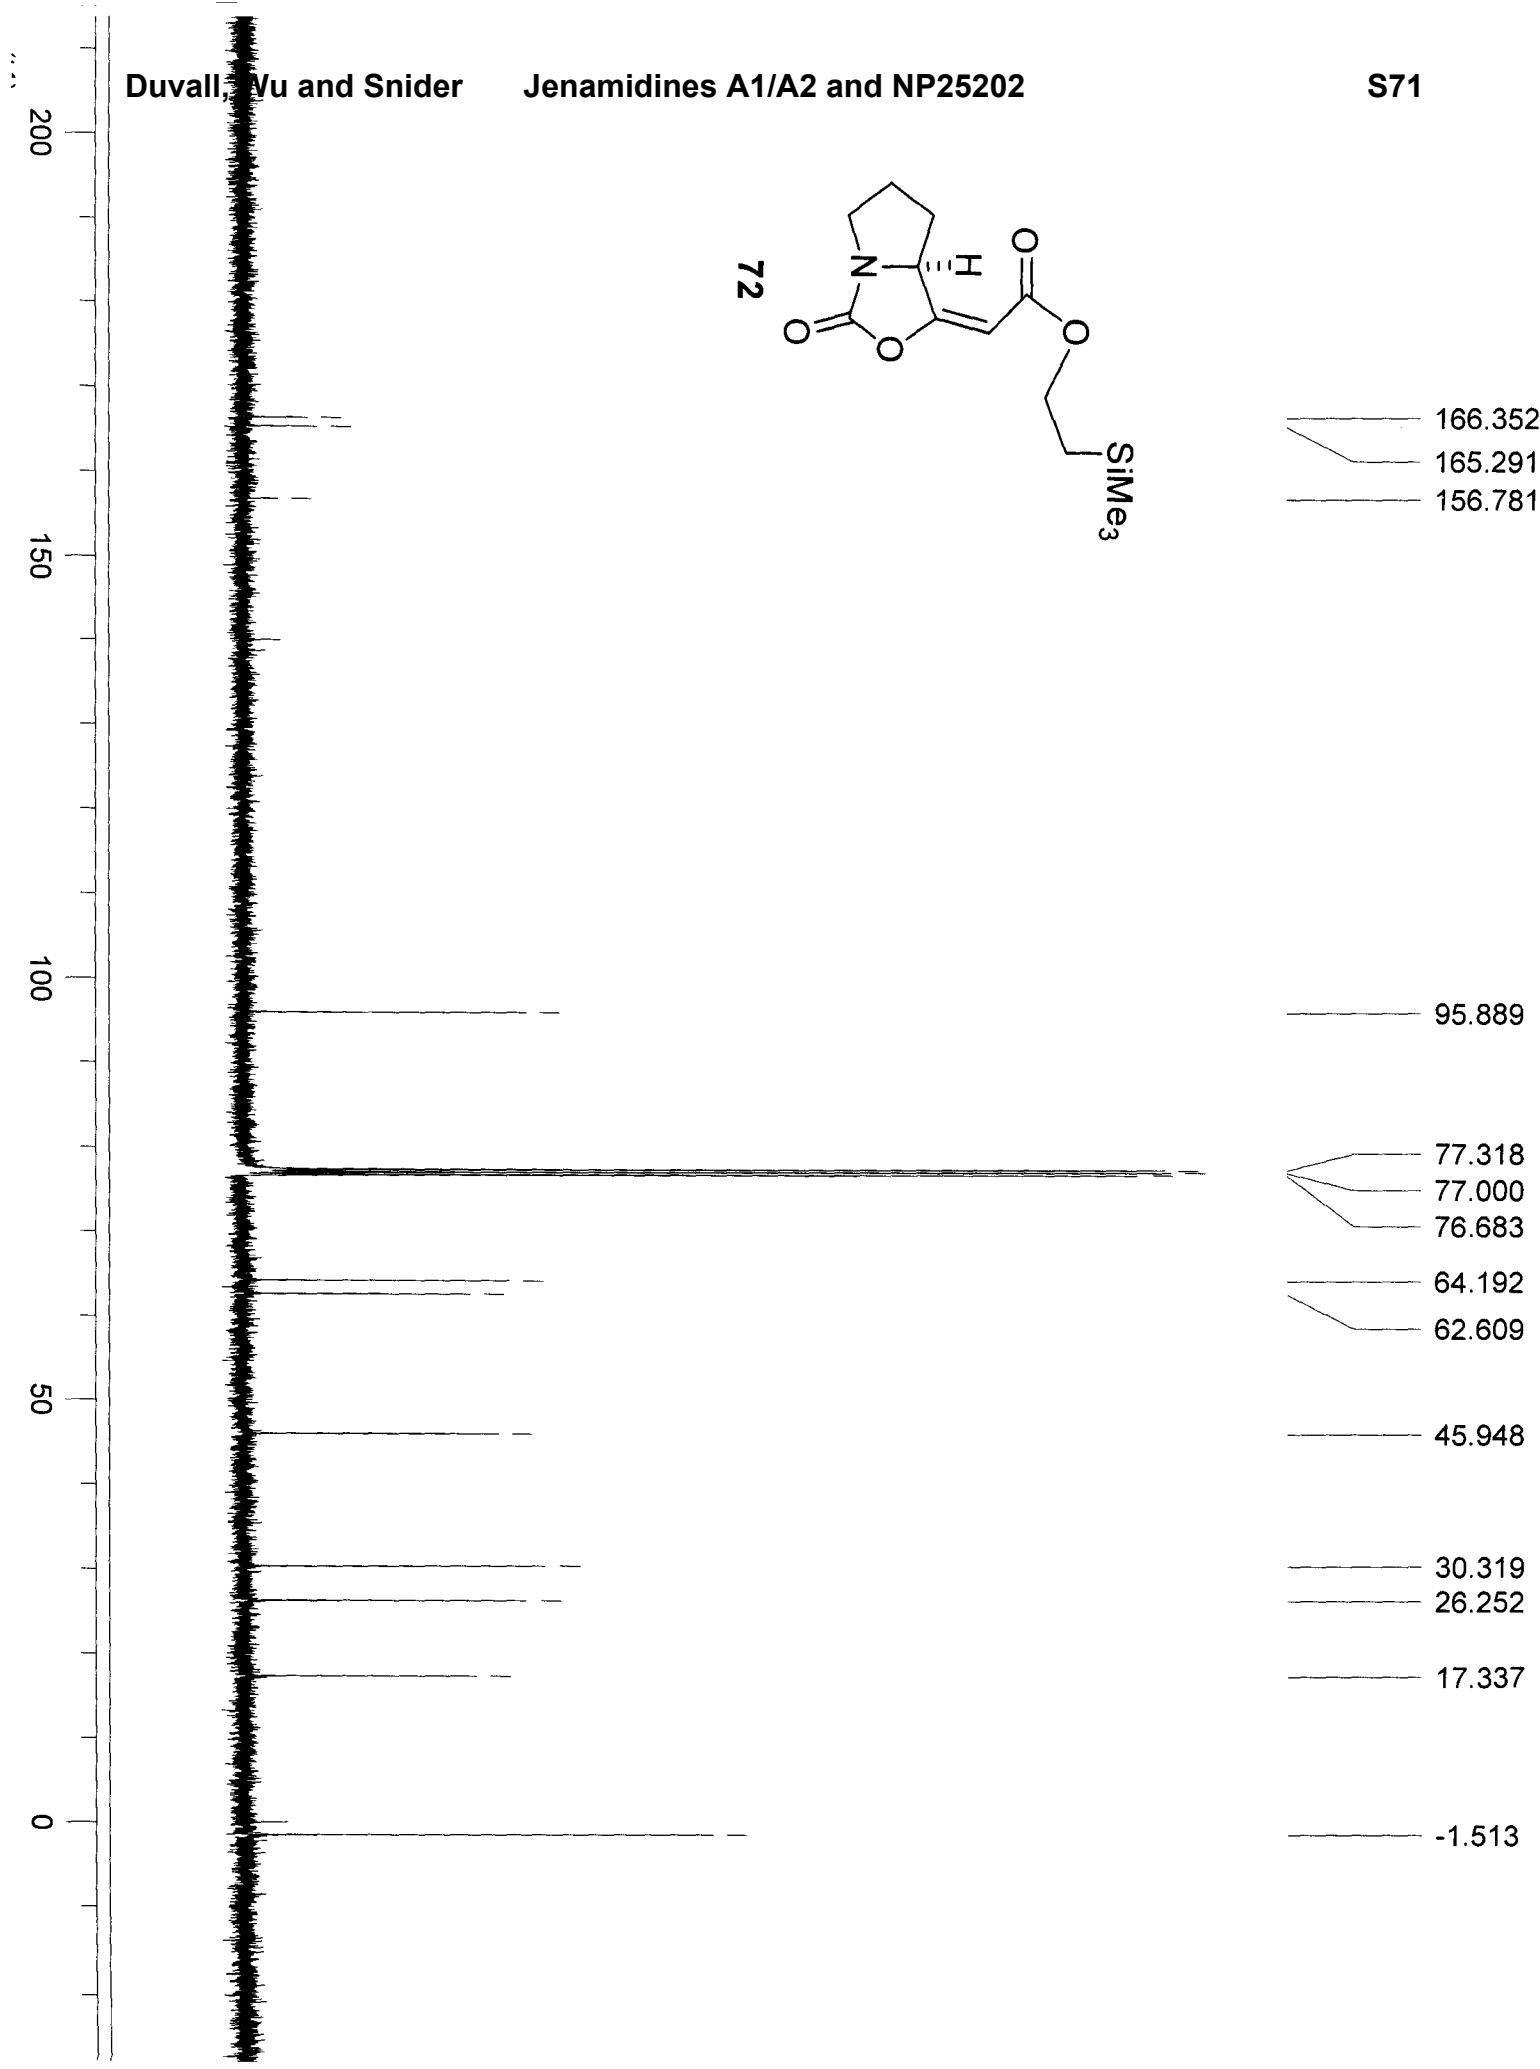

Supplement: NIHMS61489-supplement-supp.pdf [file NIHMS61489-supplement-supp.pdf]
